# Supplementary material for: Structural insights into the activation of human calcium-sensing receptor
Source: eLife. 2021 Sep 1;10:e68578. doi: 10.7554/eLife.68578 (PMC8476121; doi:10.7554/eLife.68578)
Supplement: Figure 1—source data 1. [file elife-68578-fig1-data1.xlsx]

## Sheet: Sheet1
Figure 1-Source Data 1 Intracellular Ca2+ flux assay on CaSR-NB-2D11 and CaSR-NB88 complex.
log[NB-2D11] mM	WT				log[NB88] mM	NB88
-5	22.0962	21.0975	21.5969		-6	1.16732	1.16732	-0.389105
-5.52288	14.1066	12.9831	12.8582		-6.30103	1.94552	0.77821	0.77821
-6	13.3576	12.6086	12.4837		-6.60206	39.2996	6.22568	24.1245
-6.52288	13.2328	12.6086	12.6086		-6.90309	74.3191	72.3735	85.9922
-7	32.7074	26.2158	19.4746		-7.22185	121.401	89.1051	103.113
-7.52288	55.1781	69.2848	64.9155		-7.52288	103.502	109.338	113.619
-8	81.1443	76.8998	70.658		-7.82391	115.953	107.782	98.8327
-8.52288	90.1326	89.1339	90		-8.1549	100.778	114.008	112.841
