# Supplementary material for: Structural insights into the activation of human calcium-sensing receptor
Source: eLife. 2021 Sep 1;10:e68578. doi: 10.7554/eLife.68578 (PMC8476121; doi:10.7554/eLife.68578)
Supplement: Figure 1—source data 2. [file elife-68578-fig1-data2.xlsx]

## Sheet: Sheet1
Figure 1-Source Data 2 SPR sensorgram of NB-2D11 and NB88 binding affinity
time (s)	Response Unit (NB-2D11)						time (s)	Response Unit (NB-88)
-57.36	0.113647	0.060486	0.744812	0.384338	0.52948	0.469971	-60.06	0.042603	0.21936	0.768555	1.05383	1.36206	1.16663	1.4148	1.34521
-57.26	0.086306	0.021423	0.64325	0.440615	0.46387	0.434024	-59.96	0.05127	0.222412	0.77478	1.04993	1.39172	1.22363	1.4281	1.46716
-57.16	0.074585	0.060486	0.647156	0.549194	0.544312	0.454346	-59.86	-0.01685	0.187256	0.700562	0.982788	1.35022	1.19775	1.39758	1.46863
-57.06	0.10504	0.189392	0.674498	0.593688	0.564635	0.448851	-59.76	-0.04102	0.158325	0.651245	0.983521	1.33313	1.20874	1.40613	1.46716
-56.96	0.137086	0.216736	0.64325	0.571839	0.552125	0.434815	-59.66	-0.06909	0.135742	0.609985	0.971069	1.28162	1.15723	1.38513	1.46008
-56.86	0.153503	0.197205	0.631531	0.584351	0.528687	0.434814	-59.56	-0.07617	0.130127	0.600464	0.967896	1.26111	1.17822	1.37329	1.46008
-56.76	0.156617	0.197205	0.619019	0.571046	0.494324	0.415284	-59.46	-0.06372	0.144287	0.612183	0.977173	1.27917	1.21729	1.3866	1.47961
-56.66	0.155823	0.208923	0.608887	0.571838	0.474792	0.41687	-59.36	-0.03003	0.15918	0.638062	1.0094	1.30261	1.25415	1.41711	1.50623
-56.56	0.160522	0.197205	0.599487	0.564026	0.479492	0.422302	-59.26	-0.04175	0.156738	0.629395	1.0116	1.30579	1.26343	1.43665	1.49915
-56.46	0.165222	0.182373	0.592468	0.571838	0.481812	0.44342	-59.16	-0.03564	0.162964	0.616821	1.01086	1.30725	1.26489	1.44519	1.47644
-56.36	0.174561	0.172974	0.587769	0.578857	0.474792	0.448853	-59.06	-0.03003	0.160645	0.614624	1.00378	1.29797	1.26575	1.43201	1.47498
-56.26	0.166016	0.169861	0.589355	0.580444	0.488098	0.462952	-58.96	-0.03247	0.18335	0.627075	1.01868	1.29553	1.27588	1.43665	1.49207
-56.16	0.159729	0.148743	0.583069	0.578857	0.496643	0.453552	-58.86	-0.01831	0.19043	0.643433	1.04529	1.30652	1.28687	1.453	1.51404
-56.06	0.152711	0.126892	0.565919	0.557007	0.474793	0.443421	-58.76	-0.01611	0.204346	0.658325	1.04675	1.31433	1.29932	1.4679	1.50842
-55.96	0.14801	0.126892	0.568237	0.564026	0.491211	0.438721	-58.66	0.00122	0.218506	0.658325	1.05774	1.32996	1.3291	1.48279	1.53357
-55.86	0.140991	0.131592	0.561218	0.564026	0.486511	0.438721	-58.56	0.00659	0.225586	0.662231	1.06165	1.34094	1.33057	1.47961	1.5343
-55.76	0.137878	0.138611	0.558105	0.564026	0.489624	0.438721	-58.46		0.217773	0.658325	1.07263	1.33459	1.3291	1.47253	1.52332
-55.66	0.125366	0.11908	0.540894	0.551514	0.486511	0.434021	-58.36		0.227783	0.670044	1.078	1.34558	1.33838	1.49133	1.5343
-55.56	0.105835	0.112061	0.519043	0.544495	0.474793	0.42389	-58.26	0.0083	0.22168	0.670044	1.06946	1.33704	1.34399	1.49915	1.53284
-55.46	0.101135	0.130798	0.514343	0.537476	0.479492	0.430908	-58.16	0.00342	0.219238	0.677856	1.08118	1.32678	1.35083	1.50696	1.52795
-55.36	0.089417	0.126099	0.509644	0.551514	0.481812	0.426208	-58.06	0.0083	0.236572	0.681763	1.08118	1.33386	1.34082	1.50623	1.53748
-55.26	0.09021	0.122192	0.510437	0.552307	0.482605	0.427002	-57.96	0.00732	0.230957	0.678589	1.07336	1.32605	1.33374	1.49915	1.52258
-55.16	0.091797	0.112061	0.507324	0.552307	0.479492	0.427002	-57.86	0.00513	0.242676	0.660645	1.06628	1.3175	1.33374	1.49207	1.5304
-55.06	0.082398	0.112061	0.502625	0.552307	0.477905	0.427002	-57.76	0.00122	0.23645	0.655151	1.06873	1.31897	1.33838	1.49451	1.52258
-54.96	0.077698	0.11908	0.502625	0.540588	0.482605	0.434814	-57.66	0.013672	0.237305	0.653687	1.07971	1.32068	1.34399	1.49915	1.53357
-54.86	0.067566	0.11908	0.502625	0.540588	0.482605	0.434814	-57.56	0.013672	0.246582	0.646606	1.06702	1.3197	1.34302	1.49524	1.52332
-54.76	0.074585	0.130798	0.514343	0.552307	0.502929	0.446533	-57.46	0.015137	0.247314	0.65979	1.08118	1.31897	1.34546	1.50061	1.53503
-54.66	0.069885	0.130798	0.514343	0.552307	0.49823	0.446533	-57.36	0.016113	0.249023	0.649048	1.06946	1.31287	1.34399	1.49292	1.52576
-54.56	0.062866	0.126099	0.514343	0.552307	0.49353	0.446533	-57.26	0.021485	0.268555	0.653687	1.08118	1.32214	1.34619	1.49207	1.53357
-54.46	0.058167	0.11438	0.509644	0.547608	0.486511	0.441834	-57.16	0.030029	0.274658	0.655884	1.08899	1.33459	1.35327	1.48743	1.53967
-54.36	0.055847	0.107361	0.502625	0.540588	0.474792	0.434814	-57.06	0.041748	0.280273	0.665405	1.09753	1.34558	1.35791	1.49207	1.53748
-54.26	0.070678	0.115173	0.502625	0.548401	0.477905	0.454345	-56.96	0.04419	0.2771	0.658325	1.09143	1.33704	1.34399	1.48987	1.51794
-54.16	0.067566	0.112061	0.507324	0.545288	0.467773	0.451233	-56.86	0.056641	0.280151	0.670044	1.08899	1.35022	1.35474	1.49207	1.51868
-54.06	0.058167	0.107361	0.490113	0.528077	0.463074	0.441834	-56.76	0.048828	0.266846	0.651978	1.08264	1.3385	1.33765	1.48889	1.51233
-53.96	0.051148	0.102661	0.483093	0.521057	0.463074	0.434815	-56.66	0.056641	0.275635	0.649048	1.0719	1.34412	1.33691	1.48987	1.5094
-53.86	0.051148	0.103455	0.483093	0.521057	0.463074	0.434814	-56.56	0.068359	0.274658	0.65979	1.07874	1.35486	1.34302	1.48889	1.5155
-53.76	0.051148	0.103455	0.483093	0.514038	0.463074	0.439514	-56.46	0.064453	0.280273	0.649048	1.07971	1.35193	1.33228	1.48987	1.50232
-53.66	0.041748	0.098755	0.478394	0.516357	0.458374	0.441833	-56.36	0.071533	0.288086	0.653687	1.08191	1.34631	1.33691	1.48279	1.5155
-53.56	0.024598	0.088623	0.468262	0.509339	0.451355	0.431702	-56.26	0.058105	0.27002	0.648071	1.08118	1.33386	1.32349	1.47717	1.51086
-53.46	0.031616	0.095642	0.475281	0.521057	0.463073	0.43872	-56.16	0.052002	0.265381	0.634155	1.06628	1.32922	1.30957	1.46008	1.51086
-53.36	0.019104	0.090942	0.470581	0.504639	0.450562	0.434021	-56.06	0.056641	0.265381	0.638794	1.0719	1.32532	1.30249	1.45154	1.51868
-53.26	0.012085	0.083923	0.463562	0.49762	0.451355	0.427002	-55.96	0.063721	0.2771	0.634155	1.06165	1.32678	1.29468	1.45544	1.51086
-53.16	0.012085	0.083923	0.463562	0.494507	0.443542	0.427002	-55.86	0.049561	0.265381	0.619995	1.05774	1.31042	1.28296	1.44128	1.51086
-53.06	0.012085	0.090942	0.47528	0.513244	0.455261	0.43872	-55.76	0.062989	0.271729	0.638794	1.05774	1.32532	1.28296	1.43982	1.51404
-52.96	0.00897	0.080811	0.472168	0.510132	0.456848	0.443421	-55.66	0.069092	0.269287	0.634155	1.06482	1.32678	1.28296	1.43982	1.51868
-52.86	-0.01056	0.05658	0.45575	0.493713	0.455261	0.422302	-55.56	0.06128	0.262939	0.616821	1.04749	1.30725	1.26807	1.42639	1.50378
-52.76	-0.02698	0.064392	0.45575	0.493713	0.455261	0.41217	-55.46	0.072998	0.265381	0.619263	1.04993	1.32214	1.28687	1.42883	1.50769
-52.66	-0.01996	0.071411	0.465881	0.500732	0.457581	0.41449	-55.36	0.086426	0.2771	0.634155	1.0531	1.32532	1.29004	1.42883	1.51794
-52.56	-0.02698	0.072998	0.460449	0.481995	0.443543	0.407471	-55.26	0.084717	0.2771	0.626343	1.04675	1.33386	1.29004	1.41638	1.51794
-52.46	-0.03479	0.072998	0.460449	0.486694	0.445129	0.41217	-55.16	0.072998	0.265381	0.609009	1.04211	1.32361	1.27588	1.40222	1.50061
-52.36	-0.02698	0.076111	0.475281	0.501526	0.455261	0.427002	-55.06	0.074707	0.256836	0.602905	1.03357	1.31287	1.27124	1.39758	1.50159
-52.26	-0.02698	0.076111	0.475281	0.501526	0.455261	0.427002	-54.96	0.064453	0.253662	0.606812	1.0304	1.31042	1.25879	1.38513	1.48816
-52.16	-0.03168	0.08313	0.454163	0.489014	0.450562	0.422302	-54.86	0.077637	0.266846	0.601196	1.03967	1.32361	1.25317	1.37952	1.48352
-52.06	-0.0387	0.076111	0.440125	0.481995	0.438843	0.415283	-54.76	0.068359	0.260742	0.58728	1.02576	1.30969	1.2439	1.37341	1.47961
-51.96	-0.0387	0.076111	0.440125	0.481995	0.424011	0.415283	-54.66	0.063721	0.24585	0.5802	1.00623	1.30652	1.2478	1.35852	1.46716
-51.86	-0.05042	0.076111	0.440125	0.470276	0.431824	0.415283	-54.56	0.066894	0.244385	0.5802	1.01404	1.30188	1.24634	1.35706	1.46008
-51.76	-0.05042	0.071411	0.440125	0.470276	0.424011	0.415283	-54.46	0.049561	0.241943	0.575562	1.00378	1.29089	1.23218	1.35461	1.45544
-51.66	-0.05823	0.064392	0.440125	0.470276	0.431824	0.415283	-54.36	0.057373	0.251221	0.57312	1.01868	1.29089	1.24463	1.35608	1.44983
-51.56	-0.06134	0.061279	0.437012	0.459351	0.420899	0.412171	-54.26	0.055176	0.249023	0.570923	1.01086	1.28308	1.2439	1.35388	1.44763
-51.46	-0.06604	0.053467	0.432312	0.454651	0.416199	0.402771	-54.16	0.045654	0.253662	0.569214	1.00378	1.28308	1.23218	1.3468	1.44836
-51.36	-0.06293	0.05188	0.427612	0.457764	0.419312	0.410583	-54.06	0.06128	0.250488	0.57312	1.01794	1.29089	1.23218	1.34363	1.44836
-51.26	-0.04651	0.068298	0.444031	0.474182	0.435729	0.427001	-53.96	0.061279	0.262207	0.584839	1.0155	1.29236	1.23364	1.35144	1.46155
-51.16	-0.04651	0.075317	0.451843	0.474182	0.43573	0.423889	-53.86	0.063721	0.2771	0.591919	1.02722	1.2948	1.23145	1.35852	1.46399
-51.06	-0.04651	0.068298	0.444031	0.474182	0.432617	0.419189	-53.76	0.048096	0.263916	0.586548	1.0094	1.29333	1.21582	1.35706	1.45862
-50.96	-0.05121	0.068298	0.444031	0.474182	0.423218	0.419189	-53.66	0.053467	0.262207	0.57312	0.999146	1.28308	1.21265	1.3468	1.44373
-50.86	-0.05353	0.069885	0.44873	0.474182	0.420898	0.423889	-53.56	0.05664	0.265381	0.584839	1.0155	1.28455	1.21729	1.34827	1.44983
-50.76	-0.05042	0.063599	0.451843	0.465576	0.419312	0.422302	-53.46	0.041748	0.253662	0.575562	1.00623	1.27844	1.20801	1.33435	1.44055
-50.66	-0.05353	0.060486	0.460449	0.455444	0.420898	0.423889	-53.36	0.040283	0.265381	0.571655	1.00696	1.27454	1.20093	1.33044	1.43909
-50.56	-0.05511	0.05188	0.458862	0.470276	0.419312	0.425415	-53.26	0.04419	0.257568	0.565308	0.999146	1.26672	1.20483	1.31238	1.43738
-50.46	-0.04651	0.077698	0.472168	0.481994	0.432617	0.440307	-53.16	0.041748	0.265381	0.57312	1.01086	1.26111	1.20483	1.30774	1.44055
-50.36	-0.06995	0.063599	0.463562	0.470276	0.424011	0.419189	-53.06	0.052002	0.275635	0.570923	1.01404	1.27844	1.20801	1.3031	1.44373
-50.26	-0.06995	0.05188	0.458862	0.465576	0.419312	0.41449	-52.96	0.040283	0.258301	0.553589	1.00378	1.26672	1.18921	1.29138	1.43347
-50.16	-0.06995	0.05658	0.451843	0.458557	0.40918	0.410583	-52.86	0.034668	0.266113	0.553589	0.999146	1.26111	1.20239	1.28577	1.42883
-50.06	-0.06995	0.053467	0.451843	0.470276	0.39978	0.403564	-52.76	0.03711	0.268555	0.55603	0.999146	1.26355	1.18848	1.28821	1.42566
-49.96	-0.07465	0.048767	0.451843	0.470276	0.40448	0.403564	-52.66	0.037109	0.262939	0.553589	1.00061	1.26355	1.19775	1.28821	1.42102
-49.86	-0.08478	0.048767	0.44873	0.455444	0.401367	0.400452	-52.56	0.032471	0.260742	0.55603	0.998413	1.25574	1.1853	1.2804	1.41638
-49.76	-0.07776	0.037048	0.444031	0.455445	0.396668	0.404358	-52.46	0.033936	0.272461	0.560669	1.00305	1.25574	1.19702	1.27576	1.41638
-49.66	-0.07776	0.044067	0.431519	0.457764	0.391968	0.394958	-52.36	0.017578	0.258301	0.553589	0.991333	1.24402	1.1853	1.2616	1.39905
-49.56	-0.07776	0.032349	0.4245	0.450745	0.389649	0.38324	-52.26	0.028565	0.265381	0.547485	0.991333	1.24255	1.18848	1.27185	1.40002
-49.46	-0.07465	0.02533	0.4245	0.450745	0.396667	0.387939	-52.16	0.026856	0.269287	0.538696	0.983521	1.23376	1.18677	1.27014	1.39441
-49.36	-0.08167	0.02533	0.4198	0.450745	0.384949	0.387939	-52.06	0.017578	0.254395	0.541138	0.971802	1.22449	1.17749	1.25623	1.39832
-49.26	-0.09259	0.022217	0.412781	0.450745	0.380249	0.387939	-51.96	0.016113	0.248291	0.539673	0.982788	1.22302	1.17603	1.25232	1.39685
-49.16	-0.08948	0.012817	0.409668	0.446045	0.37323	0.376221	-51.86	0.015137	0.250488	0.54187	0.979614	1.2135	1.17822	1.2616	1.4093
-49.06	-0.08087	0.019104	0.421387	0.455444	0.384948	0.392639	-51.76	0.00586	0.249023	0.537231	0.967896	1.20569	1.15723	1.25232	1.39758
-48.96	-0.06293	0.024536	0.426819	0.462463	0.388062	0.398071	-51.66	0.00439	0.245117	0.54895	0.967896	1.21594	1.15332	1.23352	1.39758
-48.86	-0.05823	0.029236	0.4245	0.457764	0.389648	0.392639	-51.56		0.243408	0.553589	0.972534	1.21277	1.15161	1.23035	1.38977
-48.76	-0.05823	0.029236	0.404968	0.447632	0.380249	0.387939	-51.46		0.25293	0.55603	0.979614	1.21277	1.15405	1.22961	1.38977
-48.66	-0.07385	0.029236	0.39325	0.434326	0.362305	0.380127	-51.36		0.247314	0.553589	0.979614	1.21741	1.15405	1.23425	1.39124
-48.56	-0.08636	0.037048	0.405762	0.458557	0.361511	0.372315	-51.26		0.249023	0.54895	0.967896	1.21594	1.14233	1.22815	1.38049
-48.46	-0.08948	0.024536	0.404968	0.455444	0.36853	0.371521	-51.16		0.253662	0.565308	0.972534	1.22205	1.14697	1.22717	1.38269
-48.36	-0.09259	0.00269	0.404968	0.450745	0.37323	0.364502	-51.06	0.01294	0.249023	0.56311	0.974976	1.21985	1.14478	1.22498	1.38904
-48.26	-0.09418	0.0011	0.399475	0.46167	0.381042	0.364502	-50.96	0.00586	0.266846	0.57312	0.991333	1.23694	1.14697	1.23425	1.37488
-48.16	-0.1059	-0.01062	0.405762	0.482788	0.385742	0.344971	-50.86	0.00586	0.25293	0.563843	0.979614	1.22766	1.13916	1.22498	1.3656
-48.06	-0.12384	-0.02856	0.38623	0.474976	0.377137	0.317627	-50.76	0.00586	0.244385	0.559937	0.979614	1.22375	1.1377	1.22107	1.36169
-47.96	-0.15277	-0.0528	0.389343	0.473389	0.336487	0.286377	-50.66		0.23877	0.561401	0.971802	1.22522	1.13452	1.21082	1.3717
-47.86	-0.16211	-0.0567	0.421387	0.514832	0.31543	0.274658	-50.56		0.242676	0.565308	0.971802	1.2323	1.13452	1.21472	1.36243
-47.76	-0.17389	-0.03796	0.446351	0.570252	0.310731	0.253541	-50.46	0.00122	0.249023	0.563843	0.971802	1.2323	1.13306	1.22034	1.36096
-47.66	-0.24493	-0.0481	0.41748	0.560916	0.259952	0.173098	-50.36	0.00342	0.241943	0.568481	0.960083	1.22058	1.12036	1.1991	1.35144
-47.56	-0.26526	-0.08014	0.385437	0.533507	0.324767	0.14337	-50.26	0.012939	0.250488	0.568481	0.955444	1.22058	1.12988	1.203	1.35535
-47.46	-0.22229	-0.07153	0.356567	0.507813	0.453735	0.115295	-50.16		0.230957	0.558228	0.930298	1.20105	1.10791	1.18347	1.33118
-47.36	-0.21838	-0.03015	0.326843	0.398376	0.356812	0.053528	-50.06		0.241211	0.560669	0.944458	1.20105	1.11182	1.19055	1.33118
-47.26	-0.17616	0.017517	0.365895	0.384328	0.289662	0.233266	-49.96	-0.01367	0.225586	0.559204	0.939087	1.18933	1.09399	1.17737	1.31799
-47.16	-0.19337	0.084717	0.445618	0.377313	0.269342	0.397333	-49.86		0.243408	0.561401	0.941284	1.20569	1.09619	1.19128	1.32874
-47.06	-0.12775	0.147217	0.554993	0.444517	0.299803	0.498106	-49.76	0.00122	0.241211	0.563843	0.952271	1.20349	1.10327	1.19373	1.3219
-46.96	-0.09412	0.165222	0.554993	0.481262	0.309998	0.555176	-49.66	0.00122	0.241211	0.565308	0.947632	1.19788	1.09863	1.19373	1.31946
-46.86	-0.08948	0.130798	0.500244	0.470276	0.319336	0.513733	-49.56		0.235596	0.561401	0.933472	1.18616	1.08447	1.17639	1.3092
-46.76	-0.06604	0.092529	0.493229	0.486698	0.316959	0.489506	-49.46		0.233398	0.55603	0.929565	1.18542	1.07593	1.16638	1.30383
-46.66	-0.02618	0.099548	0.471375	0.489017	0.302921	0.492618	-49.36	0.00122	0.229492	0.563843	0.931274	1.1886	1.06738	1.1593	1.30701
-46.56	-0.01916	0.118286	0.456543	0.470279	0.307621	0.494205	-49.26	0.017578	0.23877	0.57312	0.933472	1.19324	1.07202	1.16394	1.31628
-46.46	-0.03168	0.131531	0.431519	0.457764	0.317749	0.47229	-49.16	0.010498	0.234131	0.568481	0.928833	1.19788	1.07349	1.1593	1.31165
-46.36	-0.06445	0.135498	0.377625	0.436707	0.311523	0.424683	-49.06	0.014404	0.234863	0.569214	0.917847	1.18542	1.06812	1.15149	1.30383
-46.26	-0.09887	0.11908	0.326054	0.382755	0.28809	0.3512	-48.96	0.01294	0.22168	0.551392	0.900024	1.17688	1.05957	1.13977	1.29211
-46.16	-0.1004	0.098755	0.320618	0.35779	0.287294	0.309816	-48.86	0.00122	0.217773	0.545044	0.88269	1.17834	1.04785	1.12805	1.27576
-46.06	-0.13013	0.063599	0.32605	0.344483	0.270875	0.289491	-48.76		0.204346	0.538696	0.874878	1.17053	1.0376	1.12024	1.26233
-45.96	-0.12775	0.061279	0.338562	0.366394	0.276367	0.298889	-48.66		0.198242	0.532593	0.868774	1.16907	1.03296	1.11169	1.25623
-45.86	-0.10901	0.076111	0.350281	0.387451	0.290405	0.305908	-48.56	0.00586	0.195068	0.541138	0.858521	1.16125	1.02515	1.10535	1.24841
-45.76	-0.11762	0.079224	0.345581	0.388245	0.283386	0.309021	-48.46	0.00732	0.195068	0.541138	0.859985	1.15881	1.02515	1.10071	1.24597
-45.66	-0.10822	0.083923	0.350281	0.395263	0.287292	0.310608	-48.36	0.00122	0.198242	0.532593	0.849243	1.15735	1.0166	1.09216	1.22815
-45.56	-0.09729	0.089417	0.358887	0.408569	0.284179	0.314514	-48.26	0.00269	0.199707	0.530884	0.840454	1.14392	1.01489	1.09363	1.22253
-45.46	-0.10901	0.08313	0.3573	0.411682	0.285706	0.312927	-48.16	0.00977	0.203613	0.533325	0.842896	1.14636	1.02051	1.09607	1.22961
-45.36	-0.12073	0.076111	0.350281	0.414795	0.276367	0.298096	-48.06	0.00977	0.19043	0.516968	0.826538	1.13464	1.00171	1.07727	1.21472
-45.26	-0.12384	0.076111	0.347168	0.416382	0.291992	0.283264	-47.96	0.016113	0.178711	0.513062	0.834351	1.13782	1.00171	1.07727	1.21326
-45.16	-0.13013	0.071411	0.345581	0.419495	0.278687	0.269959	-47.86	0.00586	0.18335	0.514526	0.826538	1.13464	0.989258	1.06946	1.21008
-45.06	-0.11603	0.065979	0.347168	0.423401	0.280273	0.266846	-47.76	0.010498	0.173096	0.502808	0.812378	1.12756	0.970459	1.04602	1.203
-44.96	-0.12073	0.063599	0.337769	0.411682	0.273987	0.250427	-47.66	0.00903	0.175537	0.505249	0.804565	1.12292	0.967285	1.0343	1.19373
-44.86	-0.12073	0.047974	0.338562	0.411682	0.259949	0.243408	-47.56	0.010499	0.172363	0.502808	0.796753	1.11975	0.959473	1.02795	1.17566
-44.76	-0.12854	0.029236	0.33075	0.40387	0.244324	0.235596	-47.46	0.017578	0.177979	0.520142	0.807007	1.12537	0.969727	1.03357	1.19373
-44.66	-0.12854	0.022217	0.35498	0.411682	0.237304	0.237182	-47.36	0.025391	0.163818	0.505981	0.803101	1.11121	0.958008	1.02649	1.17883
-44.56	-0.12073	0.013611	0.35498	0.419494	0.229492	0.247314	-47.26	0.017578	0.156006	0.509888	0.785034	1.10339	0.954834	1.0304	1.17566
-44.46	-0.12854	0.022217	0.3573	0.420288	0.228699	0.254333	-47.16	0.025391	0.156006	0.514526	0.796753	1.11975	0.964111	1.03503	1.17566
-44.36	-0.12073	0.037048	0.369812	0.426514	0.231812	0.274658	-47.06	0.037109	0.172363	0.529419	0.811646	1.12683	0.966553	1.03748	1.18591
-44.26	-0.1059	0.04718	0.384643	0.434326	0.236511	0.286377	-46.96	0.045654	0.179443	0.537964	0.807007	1.12219	0.966553	1.02722	1.18738
-44.16	-0.09961	0.041748	0.38623	0.440613	0.241211	0.278565	-46.86	0.052002	0.185791	0.53186	0.811646	1.11511	0.981445	1.02576	1.18591
-44.06	-0.1051	0.048767	0.381531	0.442932	0.24353	0.266846	-46.76	0.044922	0.17627	0.525513	0.795288	1.11121	0.969727	1.01404	1.17883
-43.96	-0.1051	0.040955	0.373718	0.43042	0.228699	0.259033	-46.66	0.053467	0.175537	0.519165	0.785034	1.10339	0.959473	1.00378	1.17102
-43.86	-0.09729	0.037048	0.362	0.431213	0.229492	0.247314	-46.56	0.04419	0.163818	0.509888	0.78894	1.09167	0.959473	1.00696	1.1593
-43.76	-0.10901	0.032349	0.369812	0.416382	0.231811	0.247314	-46.46	0.040283	0.175537	0.520142	0.782837	1.10339	0.958008	1.00549	1.16248
-43.66	-0.10199	0.02533	0.366699	0.411682	0.224792	0.235596	-46.36	0.052734	0.175537	0.5177	0.780396	1.09875	0.958008	0.999878	1.16394
-43.56	-0.12073	0.022217	0.362	0.411682	0.209961	0.232483	-46.26	0.049561	0.180176	0.514526	0.777222	1.08533	0.947754	0.992066	1.15613
-43.46	-0.12384	0.017517	0.362	0.406982	0.205261	0.227783	-46.16	0.068359	0.187256	0.526245	0.772583	1.09558	0.961914	0.999146	1.15857
-43.36	-0.13324	0.00891	0.365112	0.395264	0.200562	0.230896	-46.06	0.076172	0.182617	0.516968	0.784302	1.09094	0.95166	0.994506	1.15149
-43.26	-0.12854	0.012817	0.384643	0.411682	0.216979	0.250427	-45.96	0.072998	0.172363	0.498169	0.767944	1.07214	0.943115	0.972534	1.13977
-43.16	-0.12854	0.00739	0.383118	0.413269	0.205261	0.244202	-45.86	0.063721	0.167725	0.509888	0.75769	1.0675	0.938477	0.967896	1.1366
-43.06	-0.14496		0.376831	0.399171	0.188844	0.223084	-45.76	0.06836	0.167725	0.506714	0.748413	1.05725	0.931396	0.963257	1.12415
-42.96	-0.14728		0.369812	0.380432	0.174011	0.216064	-45.66	0.071533	0.170898	0.505249	0.752319	1.05579	0.943115	0.959351	1.12732
-42.86	-0.14026		0.381531	0.380432	0.170898	0.204346	-45.56	0.076172	0.178711	0.505249	0.753784	1.0675	0.938477	0.960816	1.13196
-42.76	-0.14026	-0.01062	0.381531	0.380432	0.166199	0.216064	-45.46	0.085449	0.17627	0.51062	0.749146	1.06189	0.947754	0.972534	1.13196
-42.66	-0.14026	-0.01764	0.376831	0.383545	0.166199	0.216064	-45.36	0.087891	0.195068	0.5177	0.760864	1.06433	0.95166	0.974976	1.13977
-42.56	-0.13635		0.381531	0.399963	0.18103	0.227783	-45.26	0.09253	0.187988	0.514526	0.749146	1.05725	0.943115	0.960816	1.13269
-42.46	-0.13947	-0.01996	0.390137	0.382019	0.182617	0.22467	-45.16	0.094971	0.195068	0.509888	0.749146	1.05969	0.943115	0.967896	1.12732
-42.36	-0.15118	-0.02625	0.373718	0.37262	0.174805	0.208252	-45.06	0.098877	0.195068	0.52478	0.756958	1.0636	0.943115	0.97107	1.12341
-42.26	-0.14417	-0.02155	0.385437	0.384338	0.165405	0.219971	-44.96	0.103516	0.202881	0.52478	0.756958	1.06506	0.943115	0.972534	1.12805
-42.16	-0.14417	-0.03638	0.390137	0.384338	0.146667	0.219971	-44.86	0.091065	0.19043	0.5177	0.744507	1.04797	0.935303	0.960083	1.11707
-42.06	-0.14105	-0.01453	0.411987	0.402282	0.166198	0.234802	-44.76	0.083985	0.18335	0.514526	0.745972	1.04089	0.947021	0.963257	1.11243
-41.96	-0.13324		0.4198	0.411682	0.177917	0.239502	-44.66	0.088623	0.199707	0.509888	0.745972	1.04553	0.947021	0.960815	1.11707
-41.86	-0.13324	-0.01843	0.432312	0.407776	0.18103	0.223083	-44.56	0.095703	0.206787	0.509888	0.748413	1.04944	0.947021	0.967895	1.12415
-41.76	-0.14337	-0.01294	0.440918	0.419495	0.174011	0.19812	-44.46	0.087158	0.193604	0.498169	0.732788	1.03625	0.94165	0.954712	1.12341
-41.66	-0.13947	-0.03717	0.458862	0.435913	0.170898	0.203552	-44.36	0.092529	0.187988	0.490356	0.72644	1.02844	0.928223	0.944458	1.1156
-41.56	-0.14496	-0.04657	0.466675	0.421814	0.14508	0.199646	-44.26	0.087891	0.206787	0.497437	0.705444	1.03308	0.923584	0.941284	1.10535
-41.46	-0.13635	-0.02386	0.48468	0.408569	0.146667	0.205933	-44.16	0.087891	0.202148	0.490356	0.710083	1.03308	0.923584	0.928833	1.0929
-41.36	-0.14575	-0.01843	0.481506	0.395264	0.142761	0.226196	-44.06	0.092529	0.204346	0.490356	0.714722	1.03308	0.928223	0.941284	1.09753
-41.26	-0.14258		0.490906	0.380432	0.142761	0.239502	-43.96	0.083252	0.195068	0.483276	0.706909	1.02136	0.918945	0.936646	1.08826
-41.16	-0.12073	0.026123	0.487793	0.373413	0.134949	0.26062	-43.86	0.087891	0.206787	0.490356	0.709351	1.02991	0.92041	0.948364	1.0929
-41.06	-0.10901	0.05426	0.476074	0.385132	0.140442	0.279358	-43.76	0.095703	0.213867	0.490356	0.702271	1.02527	0.915771	0.948364	1.0929
-40.96	-0.12854	0.035461	0.450256	0.371033	0.141174	0.262146	-43.66	0.095703	0.2146	0.490356	0.713989	1.02527	0.915771	0.943726	1.0929
-40.86	-0.12384	0.026917	0.441711	0.3703	0.15686	0.252014	-43.56	0.095703	0.206787	0.485718	0.709351	1.02063	0.911133	0.936646	1.0929
-40.76	-0.10199	0.040161	0.443238	0.375733	0.176331	0.259034	-43.46	0.091065	0.209961	0.481812	0.710083	1.01672	0.904053	0.939819	1.0929
-40.66	-0.10901	0.037048	0.441711	0.362489	0.166993	0.227785	-43.36	0.100342	0.222412	0.494995	0.710083	1.02136	0.904053	0.941284	1.0929
-40.56	-0.10431	0.041748	0.443237	0.375733	0.189637	0.235596	-43.26	0.100342	0.227051	0.494995	0.714722	1.02283	0.904053	0.941284	1.09753
-40.46	-0.09729	0.05188	0.451843	0.377319	0.217773	0.227783	-43.16	0.102783	0.234131	0.502075	0.717163	1.02527	0.915771	0.948364	1.09998
-40.36	-0.1106	0.044861	0.451843	0.364014	0.227905	0.211365	-43.06	0.095703	0.230957	0.497437	0.706909	1.02527	0.915771	0.943725	1.0929
-40.26	-0.11212	0.048767	0.432313	0.37262	0.232606	0.208253	-42.96	0.083984	0.226318	0.48645	0.690552	1.00891	0.900879	0.924927	1.07654
-40.16	-0.11603	0.049561	0.413574	0.361695	0.242005	0.209046	-42.86	0.088623	0.230957	0.487915	0.702271	1.0033	0.900879	0.929565	1.07092
-40.06	-0.10199	0.04718	0.415894	0.360901	0.251343	0.211365	-42.76	0.104248	0.249756	0.513794	0.713989	1.01746	0.907959	0.94519	1.08508
-39.96	-0.09729	0.038635	0.39325	0.36792	0.256042	0.208252	-42.66	0.111328	0.25293	0.509155	0.718628	1.01282	0.919678	0.940552	1.08044
-39.86	-0.09961	0.040161	0.363586	0.365601	0.252136	0.201233	-42.56	0.114502	0.249023	0.505249	0.717163	1.00891	0.918213	0.939087	1.07654
-39.76	-0.1098	0.037048	0.344789	0.356996	0.252931	0.195741	-42.46	0.114502	0.265381	0.506714	0.733521	1.01355	0.915771	0.948364	1.078
-39.66	-0.11371	0.033142	0.319031	0.332765	0.234926	0.184816	-42.36	0.107422	0.262207	0.509888	0.728882	1.01038	0.915771	0.948364	1.07336
-39.56	-0.11212	0.017517	0.300293	0.338258	0.229493	0.180909	-42.26	0.095703	0.24585	0.49353	0.710083	0.994019	0.904053	0.933472	1.06946
-39.46	-0.12543	0.0058	0.275269	0.320251	0.216187	0.160583	-42.16	0.091065	0.241211	0.498169	0.706909	1.0011	0.899414	0.928833	1.06482
-39.36	-0.10431	0.026123	0.272949	0.346863	0.225586	0.162964	-42.06	0.108155	0.258301	0.514526	0.713989	1.01819	0.908691	0.940552	1.0741
-39.26	-0.10901	0.02063	0.26355	0.336671	0.220093	0.172303	-41.96	0.112061	0.262207	0.516968	0.713989	1.02063	0.92041	0.940552	1.08118
-39.16	-0.11371	0.02533	0.276855	0.31482	0.19043	0.172303	-41.86	0.107422	0.257568	0.506714	0.713989	1.01355	0.915771	0.935913	1.078
-39.06	-0.12854	0.0058	0.286987	0.302307	0.169312	0.150452	-41.76	0.098877	0.244385	0.49353	0.705444	0.994019	0.907227	0.920288	1.06018
-38.96	-0.12073	0.010498	0.296387	0.314026	0.181824	0.157471	-41.66	0.098877	0.241943	0.505249	0.710083	1.00183	0.907227	0.921753	1.05774
-38.86	-0.10431	0.02063	0.311218	0.321838	0.19043	0.160583	-41.56	0.091797	0.241943	0.498169	0.705444	0.98938	0.88916	0.928833	1.05774
-38.76	-0.09808	0.040955	0.333861	0.332763	0.220885	0.197326	-41.46	0.091797	0.237305	0.494995	0.698364	0.990112	0.884521	0.928833	1.05774
-38.66	-0.07776	0.05658	0.342468	0.3562	0.239623	0.227782	-41.36	0.093262	0.243408	0.502808	0.703003	0.994751	0.88916	0.917114	1.06238
-38.56	-0.07697	0.061279	0.35498	0.342163	0.245117	0.228576	-41.26	0.095703	0.24585	0.509888	0.706909	1.00183	0.891602	0.91394	1.06628
-38.46	-0.07776	0.048767	0.354187	0.329651	0.24823	0.242615	-41.16	0.107422	0.24585	0.509888	0.697632	0.990845	0.872803	0.909302	1.05701
-38.36	-0.07306	0.05658	0.358887	0.337463	0.252136	0.264526	-41.06	0.107422	0.241211	0.497437	0.687378	0.986206	0.884521	0.904663	1.04993
-38.26	-0.07074	0.044067	0.326844	0.338257	0.248231	0.26294	-40.96	0.110596	0.237305	0.49353	0.685913	0.98938	0.884521	0.900757	1.04846
-38.16	-0.07465	0.037048	0.310425	0.340577	0.231812	0.249634	-40.86	0.107422	0.250488	0.491821	0.687378	0.990845	0.881348	0.91394	1.03503
-38.06	-0.06995	0.037048	0.303406	0.328858	0.22168	0.232483	-40.76	0.098877	0.24585	0.49353	0.685913	0.98938	0.863525	0.912476	1.03821
-37.96	-0.08087	0.029236	0.300293	0.323425	0.209167	0.219971	-40.66	0.115234	0.24585	0.485718	0.685913	0.98938	0.861084	0.905396	1.0304
-37.86	-0.09729	0.017517	0.310425	0.317139	0.200562	0.211365	-40.56	0.115235	0.24585	0.478638	0.686646	0.9823	0.861084	0.902222	1.0304
-37.76	-0.09729	0.0058	0.315124	0.317138	0.202148	0.208252	-40.46	0.127686	0.258301	0.483276	0.691284	0.986938	0.861084	0.91394	1.0304
-37.66	-0.1012	0.013611	0.315125	0.317932	0.200561	0.204345	-40.36	0.126953	0.257568	0.490356	0.690552	0.986206	0.845459	0.913208	1.01086
-37.56	-0.1012	0.013611	0.298706	0.314819	0.181824	0.204346	-40.26	0.123779	0.257568	0.487183	0.687378	0.983032	0.842285	0.913208	1.00769
-37.46	-0.10901	0.010498	0.296387	0.318726	0.183411	0.194214	-40.16	0.134033	0.260742	0.481079	0.685913	0.981567	0.848633	0.916382	1.01794
-37.36	-0.09729	0.012817	0.303406	0.328857	0.195862	0.206665	-40.06	0.122315	0.249023	0.466919	0.678833	0.974487	0.83374	0.909302	0.994507
-37.26	-0.09259	0.014404	0.303406	0.330445	0.19513	0.205933	-39.96	0.119873	0.246582	0.471558	0.69519	0.979126	0.838379	0.91394	0.988892
-37.16	-0.08246	0.0097	0.298706	0.309327	0.192749	0.198853	-39.86	0.126953	0.253662	0.466187	0.702271	0.981567	0.845459	0.921021	0.991333
-37.06	-0.08557		0.280762	0.294495	0.170106	0.188721	-39.76	0.123779	0.253662	0.459106	0.697632	0.974487	0.845459	0.921021	0.991333
-36.96	-0.09259	-0.01843	0.276062	0.285889	0.158386	0.165283	-39.66	0.131592	0.27002	0.463745	0.69519	0.979126	0.838379	0.921021	0.988159
-36.86	-0.08246	-0.01685	0.264343	0.302307	0.158386	0.16217	-39.56	0.138672	0.2771	0.478638	0.697632	0.986206	0.84082	0.921021	0.990601
-36.76	-0.08246	-0.02625	0.259644	0.297608	0.156799	0.144959	-39.46	0.138672	0.273926	0.478638	0.690552	0.986206	0.825928	0.928833	0.983521
-36.66	-0.09961	-0.03326	0.244812	0.292176	0.151368	0.13794	-39.36	0.145752	0.269287	0.475464	0.690552	0.974487	0.822754	0.921021	0.983521
-36.56	-0.09729	-0.02856	0.233093	0.294495	0.146668	0.142639	-39.26	0.141845	0.275635	0.473999	0.693726	0.973022	0.821289	0.924194	0.974976
-36.46	-0.1051	-0.02936	0.233093	0.299194	0.146667	0.152771	-39.16	0.134766	0.253662	0.466919	0.683472	0.958862	0.814209	0.917114	0.964722
-36.36	-0.09338	-0.01764	0.249512	0.321045	0.163086	0.173889	-39.06	0.13794	0.253662	0.466919	0.686646	0.958862	0.814209	0.917114	0.955444
-36.26	-0.09027	-0.01453	0.244812	0.330444	0.173218	0.172302	-38.96	0.144043	0.258301	0.471558	0.691284	0.951782	0.807129	0.921753	0.953003
-36.16	-0.09259		0.252625	0.328857	0.182617	0.181702	-38.86	0.146484	0.265381	0.478638	0.698364	0.955688	0.814209	0.928833	0.960083
-36.06	-0.08716	0.000305	0.259644	0.333557	0.188049	0.184021	-38.76	0.141846	0.265381	0.485718	0.710083	0.95105	0.814209	0.928833	0.955444
-35.96	-0.08478	0.00269	0.255737	0.33667	0.19043	0.188721	-38.66	0.130127	0.265381	0.473999	0.700806	0.938599	0.804932	0.924194	0.932007
-35.86	-0.08087		0.249512	0.333557	0.189636	0.188721	-38.56	0.139405	0.265381	0.478638	0.703003	0.943237	0.80249	0.912476	0.936646
-35.76	-0.08557	-0.01685	0.246399	0.323426	0.182618	0.178589	-38.46	0.142578	0.273193	0.491089	0.713257	0.95105	0.810303	0.913208	0.944458
-35.66	-0.07776	-0.01373	0.254944	0.33667	0.197449	0.187134	-38.36	0.154297	0.273193	0.48645	0.706177	0.95105	0.810303	0.913208	0.956177
-35.56	-0.08246	-0.01373	0.252625	0.33667	0.184144	0.177002	-38.26	0.146485	0.265381	0.478638	0.710083	0.943237	0.799316	0.902222	0.936646
-35.46	-0.07776	-0.01373	0.252625	0.334351	0.19043	0.177002	-38.16	0.151123	0.27002	0.494995	0.714722	0.947876	0.799316	0.902222	0.93811
-35.36	-0.07776	-0.01843	0.252625	0.324951	0.177124	0.165283	-38.06	0.165283	0.2771	0.502075	0.721802	0.954956	0.790039	0.909301	0.952271
-35.26	-0.08789	-0.01685	0.249512	0.319519	0.183411	0.166871	-37.96	0.146484	0.265381	0.490356	0.706909	0.943237	0.77124	0.897583	0.928833
-35.16	-0.09027	-0.03326	0.243225	0.312439	0.173218	0.16449	-37.86	0.154297	0.265381	0.490356	0.702271	0.931519	0.763428	0.897583	0.928833
-35.06	-0.09418	-0.03326	0.245605	0.31482	0.166199	0.148865	-37.76	0.16919	0.263916	0.488892	0.705444	0.930054	0.774414	0.896119	0.932007
-34.96	-0.1051	-0.04578	0.244812	0.314026	0.158386	0.142639	-37.66	0.178467	0.266113	0.498901	0.710083	0.932251	0.783691	0.902954	0.941284
-34.86	-0.11682	-0.06921	0.216675	0.297607	0.141968	0.136353	-37.56	0.185547	0.273193	0.505981	0.710083	0.936157	0.782959	0.912475	0.943726
-34.76	-0.12152	-0.07153	0.224487	0.30542	0.138061	0.138733	-37.46	0.185547	0.272461	0.498169	0.699097	0.915894	0.782959	0.897583	0.921021
-34.66	-0.12384	-0.06921	0.233887	0.303101	0.147461	0.137939	-37.36	0.182373	0.265381	0.498169	0.694458	0.915894	0.782959	0.897583	0.928833
-34.56	-0.12543	-0.07623	0.229187	0.303101	0.147461	0.134034	-37.26	0.173096	0.253662	0.498169	0.689819	0.904175	0.779785	0.894409	0.917847
-34.46	-0.10431	-0.07153	0.240906	0.324951	0.157593	0.150452	-37.16	0.180908	0.268555	0.509888	0.674194	0.907349	0.77832	0.892944	0.916382
-34.36	-0.10431	-0.0567	0.262024	0.331238	0.171692	0.165283	-37.06	0.182373	0.27002	0.509888	0.690552	0.904175	0.770508	0.897583	0.921021
-34.26	-0.1059	-0.052	0.264343	0.33667	0.169312	0.169983	-36.96	0.166016	0.241943	0.498169	0.675659	0.892456	0.759521	0.885864	0.909302
-34.16	-0.0965	-0.04028	0.272156	0.346069	0.178711	0.180115	-36.86	0.166016	0.253662	0.498169	0.671021	0.876099	0.754883	0.885864	0.909302
-34.06	-0.09106	-0.04266	0.282288	0.351502	0.188843	0.184815	-36.76	0.161377	0.241943	0.505249	0.671021	0.869019	0.747803	0.885864	0.892944
-33.96	-0.0965	-0.0434	0.269836	0.350769	0.195129	0.181702	-36.66	0.166748	0.258301	0.502808	0.671021	0.873657	0.741455	0.890503	0.890503
-33.86	-0.0965	-0.03796	0.276855	0.34137	0.188843	0.191833	-36.56	0.173828	0.253662	0.509888	0.671021	0.869019	0.743896	0.885864	0.894409
-33.76	-0.09729	-0.03326	0.282288	0.33667	0.196655	0.184815	-36.46	0.166016	0.24585	0.502075	0.663208	0.858032	0.736084	0.881226	0.881958
-33.66	-0.08246	-0.03015	0.291687	0.33667	0.213074	0.201233	-36.36	0.161377	0.24585	0.502075	0.663208	0.845581	0.736084	0.885864	0.877319
-33.56	-0.08087	-0.02856	0.293274	0.326538	0.202149	0.205139	-36.26	0.147217	0.23877	0.502808	0.656128	0.838501	0.732178	0.878785	0.863159
-33.46	-0.09027	-0.03796	0.286194	0.317139	0.192749	0.19574	-36.16	0.157471	0.249023	0.513062	0.669556	0.848755	0.727539	0.885864	0.873413
-33.36	-0.09729	-0.04028	0.283875	0.302307	0.19043	0.188721	-36.06	0.154297	0.238037	0.502075	0.659302	0.845581	0.721191	0.870239	0.865601
-33.26	-0.1004	-0.04578	0.272156	0.307007	0.197449	0.184021	-35.96	0.154297	0.238037	0.502075	0.648315	0.845581	0.716553	0.870239	0.858521
-33.16	-0.11682	-0.0434	0.273743	0.318725	0.202148	0.173889	-35.86	0.144043	0.230957	0.502808	0.636597	0.833862	0.709473	0.863159	0.843628
-33.06	-0.12854	-0.04108	0.252625	0.297608	0.18573	0.173889	-35.76	0.158203	0.238037	0.509888	0.643677	0.833862	0.716553	0.870239	0.850708
-32.96	-0.12854	-0.0481	0.255737	0.295288	0.18573	0.180908	-35.66	0.146484	0.229492	0.498169	0.631958	0.822144	0.704834	0.846802	0.835815
-32.86	-0.12854	-0.04108	0.260437	0.290588	0.18573	0.169189	-35.56	0.149658	0.222412	0.501343	0.635132	0.825317	0.708008	0.849975	0.834351
-32.76	-0.12152	-0.03406	0.276855	0.297607	0.197448	0.180908	-35.46	0.146484	0.229492	0.498169	0.631958	0.81897	0.700195	0.838989	0.831177
-32.66	-0.13324	-0.04108	0.271362	0.278076	0.184937	0.176209	-35.36	0.146484	0.222412	0.498169	0.631958	0.797974	0.693115	0.838989	0.831177
-32.56	-0.14337	-0.03638	0.269043	0.275757	0.182617	0.173889	-35.26	0.130127	0.210693	0.498169	0.620239	0.779175	0.681396	0.82727	0.819458
-32.46	-0.13635	-0.03094	0.271362	0.278076	0.184937	0.179321	-35.16	0.115234	0.199707	0.473999	0.612427	0.783081	0.673584	0.819458	0.811646
-32.36	-0.14807	-0.03326	0.264343	0.271057	0.177917	0.177002	-35.06	0.115234	0.198242	0.466919	0.612427	0.766724	0.673584	0.814819	0.807007
-32.26	-0.14807	-0.04498	0.264343	0.259338	0.169312	0.165283	-34.96	0.115234	0.199707	0.466919	0.607788	0.75647	0.673584	0.807739	0.799927
-32.16	-0.14807	-0.04498	0.252625	0.259338	0.170898	0.165283	-34.86	0.10498	0.187988	0.459839	0.593628	0.736938	0.666504	0.800659	0.792847
-32.06	-0.15277	-0.0528	0.252625	0.259338	0.169312	0.169983	-34.76	0.107422	0.195068	0.463745	0.600708	0.744019	0.673584	0.79602	0.796753
-31.96	-0.15979	-0.0528	0.252625	0.259338	0.174011	0.177002	-34.66	0.102783	0.19043	0.457642	0.592896	0.734741	0.668945	0.799927	0.787476
-31.86	-0.15979	-0.0528	0.244812	0.259338	0.174011	0.177002	-34.56	0.102783	0.19043	0.475464	0.581177	0.717407	0.67041	0.783569	0.792114
-31.76	-0.15979	-0.0528	0.244812	0.251526	0.174011	0.177002	-34.46	0.072266	0.171631	0.447388	0.569458	0.712769	0.654053	0.764771	0.780396
-31.66	-0.15979	-0.0528	0.244812	0.236694	0.174011	0.180115	-34.36	0.076904	0.171631	0.447388	0.569458	0.696411	0.649414	0.764771	0.780396
-31.56	-0.15509	-0.04498	0.252625	0.239807	0.181824	0.192627	-34.26	0.083984	0.163818	0.447388	0.569458	0.689331	0.646973	0.761597	0.783569
-31.46	-0.15979	-0.04498	0.252625	0.24292	0.181824	0.192627	-34.16	0.079346	0.163818	0.447388	0.569458	0.681519	0.649414	0.752319	0.776489
-31.36	-0.15979	-0.04498	0.252625	0.236694	0.181824	0.184814	-34.06	0.072265	0.163818	0.442749	0.553101	0.678345	0.642334	0.737426	0.776489
-31.26	-0.15979	-0.03717	0.252625	0.231995	0.181824	0.184814	-33.96	0.076172	0.152832	0.427856	0.549927	0.665894	0.634521	0.724976	0.768677
-31.16	-0.15979	-0.03717	0.252625	0.231995	0.178711	0.184814	-33.86	0.064453	0.148193	0.424683	0.538208	0.665894	0.634521	0.717896	0.765503
-31.06	-0.16449	-0.04498	0.240906	0.220276	0.174011	0.189514	-33.76	0.069092	0.152832	0.424683	0.542847	0.665894	0.63916	0.71936	0.765503
-30.96	-0.14807	-0.03638	0.252625	0.231994	0.18573	0.203552	-33.66	0.064453	0.136475	0.420044	0.535034	0.642456	0.642334	0.710083	0.760864
-30.86	-0.15979	-0.04968	0.240906	0.220276	0.169312	0.189514	-33.56	0.076172	0.143555	0.420044	0.530396	0.642456	0.634521	0.698364	0.760864
-30.76	-0.14807	-0.03326	0.252624	0.220275	0.18573	0.208252	-33.46	0.064453	0.124756	0.407593	0.522583	0.639282	0.634521	0.698364	0.756226
-30.66	-0.15118	-0.03326	0.247925	0.215576	0.18573	0.203552	-33.36	0.064453	0.124756	0.400513	0.522583	0.634644	0.634521	0.693726	0.749146
-30.56	-0.16058	-0.03326	0.240906	0.200745	0.18573	0.196533	-33.26	0.064453	0.124756	0.388794	0.517944	0.630005	0.631348	0.686646	0.749146
-30.46	-0.1676	-0.03326	0.240906	0.205444	0.182617	0.196533	-33.16	0.064453	0.120117	0.400513	0.510864	0.622925	0.626709	0.683472	0.749146
-30.36	-0.15979	-0.03326	0.245605	0.207764	0.166199	0.196533	-33.06	0.057374	0.105957	0.381714	0.503784	0.611206	0.61499	0.671754	0.742065
-30.26	-0.15979	-0.03326	0.244812	0.200745	0.177917	0.196533	-32.96	0.076172	0.121582	0.397339	0.522583	0.611938	0.626709	0.682739	0.75769
-30.16	-0.1676	-0.02545	0.252625	0.189026	0.177917	0.196533	-32.86	0.076172	0.128662	0.3927	0.50769	0.6073	0.626709	0.682739	0.753052
-30.06	-0.17542	-0.03015	0.247925	0.189026	0.161499	0.196533	-32.76	0.076172	0.128662	0.3927	0.503052	0.602661	0.62207	0.678101	0.753052
-29.96	-0.18402	-0.03717	0.240906	0.189026	0.157593	0.196533	-32.66	0.079346	0.131836	0.395874	0.501587	0.595581	0.618164	0.674194	0.751587
-29.86	-0.18243	-0.03717	0.236206	0.181213	0.162292	0.191833	-32.56	0.083984	0.136475	0.384155	0.499146	0.595581	0.619629	0.678833	0.741333
-29.76	-0.17853	-0.02856	0.237793	0.189819	0.170898	0.19812	-32.46	0.083984	0.136475	0.377075	0.499146	0.590942	0.61499	0.678833	0.749146
-29.66	-0.18323	-0.03326	0.233093	0.18512	0.163086	0.19574	-32.36	0.088623	0.136475	0.37854	0.495972	0.588501	0.619629	0.671753	0.745972
-29.56	-0.18323	-0.02155	0.233093	0.18512	0.158386	0.19342	-32.26	0.095703	0.133301	0.380981	0.503052	0.580688	0.626709	0.678833	0.753052
-29.46	-0.18012	-0.02466	0.233093	0.173401	0.158386	0.188721	-32.16	0.076172	0.116943	0.369263	0.486694	0.564331	0.61499	0.66394	0.741333
-29.36	-0.18713	-0.02936	0.233093	0.173401	0.158386	0.188721	-32.06	0.087891	0.124023	0.36853	0.491333	0.571411	0.626709	0.659302	0.753052
-29.26	-0.17932	-0.02155	0.233093	0.181213	0.166198	0.196533	-31.96	0.08789	0.116943	0.369263	0.491333	0.564331	0.62207	0.654663	0.741333
-29.16	-0.17932	-0.02155	0.233093	0.176514	0.166199	0.196533	-31.86	0.072998	0.093506	0.349731	0.47644	0.547974	0.591553	0.635864	0.729614
-29.06	-0.17932	-0.03326	0.233093	0.174194	0.166199	0.196533	-31.76	0.06836	0.102051	0.349731	0.471802	0.540894	0.588379	0.628052	0.724976
-28.96	-0.18402	-0.02155	0.233093	0.173401	0.15448	0.196533	-31.66	0.07544	0.109131	0.36145	0.471802	0.549438	0.595459	0.639771	0.729614
-28.86	-0.19574	-0.03094	0.228394	0.168701	0.161499	0.194946	-31.56	0.059815	0.112305	0.359985	0.474976	0.547974	0.598633	0.642944	0.732788
-28.76	-0.20276	-0.04028	0.221375	0.149964	0.142761	0.192627	-31.46	0.064453	0.116943	0.357544	0.479614	0.552612	0.603271	0.635864	0.737427
-28.66	-0.20587	-0.03796	0.221375	0.149963	0.134949	0.197327	-31.36	0.064453	0.100586	0.35437	0.479614	0.552612	0.595459	0.63269	0.734253
-28.56	-0.18713	-0.03326	0.233093	0.161682	0.146667	0.211365	-31.26	0.064453	0.093506	0.338013	0.479614	0.536255	0.595459	0.615601	0.729614
-28.46	-0.19025	-0.03638	0.22998	0.158569	0.143555	0.201233	-31.16	0.064453	0.093506	0.338013	0.471802	0.529175	0.59082	0.608521	0.721802
-28.36	-0.19495	-0.04108	0.225281	0.15387	0.138855	0.196533	-31.06	0.064453	0.093506	0.338013	0.471802	0.526001	0.58374	0.603882	0.721802
-28.26	-0.19495	-0.04108	0.225281	0.146057	0.138855	0.196533	-30.96	0.056641	0.090332	0.338013	0.471802	0.521362	0.57666	0.593628	0.721802
-28.16	-0.19495	-0.02466	0.22998	0.134338	0.138855	0.196533	-30.86	0.056641	0.085693	0.338013	0.471802	0.51355	0.579102	0.577271	0.721802
-28.06	-0.21838	-0.03406	0.225281	0.11792	0.127136	0.177002	-30.76	0.056641	0.085693	0.333374	0.460083	0.51355	0.572021	0.577271	0.705444
-27.96	-0.21838	-0.03326	0.225281	0.110901	0.127136	0.177002	-30.66	0.056641	0.085693	0.32312	0.455444	0.51355	0.564209	0.572632	0.698364
-27.86	-0.20667	-0.02155	0.236999	0.122619	0.138855	0.18872	-30.56	0.044922	0.085693	0.318481	0.448364	0.508911	0.564209	0.565552	0.698364
-27.76	-0.21838	-0.03326	0.225281	0.107789	0.127137	0.177002	-30.46	0.049561	0.08252	0.32312	0.449829	0.494751	0.568848	0.567017	0.703003
-27.66	-0.20667	-0.03796	0.220581	0.103088	0.127136	0.177002	-30.36	0.068359	0.109131	0.341919	0.456177	0.51355	0.587646	0.581177	0.713989
-27.56	-0.22308	-0.04498	0.213562	0.103088	0.115417	0.165283	-30.26	0.068359	0.109131	0.33728	0.463989	0.51355	0.587646	0.581177	0.713989
-27.46	-0.2301	-0.04498	0.213562	0.09137	0.115417	0.177002	-30.16	0.068359	0.104492	0.3302	0.456177	0.505737	0.575928	0.573364	0.710815
-27.36	-0.21838	-0.03326	0.213562	0.09137	0.115417	0.169983	-30.06	0.059082	0.097412	0.317749	0.446899	0.501099	0.571289	0.568726	0.704712
-27.26	-0.21838	-0.0481	0.213562	0.09137	0.127136	0.177002	-29.96	0.052734	0.092773	0.315308	0.428833	0.501831	0.572021	0.553101	0.706909
-27.16	-0.21838	-0.04108	0.218262	0.09137	0.115417	0.172302	-29.86	0.049561	0.090332	0.315308	0.433472	0.494751	0.573486	0.550659	0.706909
-27.06	-0.21527	-0.03796	0.208862	0.094482	0.130249	0.168396	-29.76	0.048828	0.092773	0.317749	0.435913	0.497192	0.571289	0.545288	0.697632
-26.96	-0.21057	-0.03326	0.213562	0.099182	0.12323	0.173096	-29.66	0.025391	0.085693	0.30603	0.425659	0.490112	0.55957	0.538208	0.690552
-26.86	-0.21057	-0.03326	0.221375	0.099182	0.12323	0.173096	-29.56	0.030029	0.078613	0.303589	0.41394	0.494751	0.557129	0.542847	0.69519
-26.76	-0.21368	-0.03326	0.221375	0.09137	0.12323	0.16217	-29.46	0.03711	0.085693	0.310669	0.416382	0.494019	0.547852	0.535034	0.690552
-26.66	-0.21838	-0.03796	0.213562	0.09137	0.12323	0.157471	-29.36	0.048828	0.097412	0.319214	0.413208	0.505737	0.55249	0.542114	0.702271
-26.56	-0.21838	-0.04498	0.213562	0.09137	0.12323	0.145752	-29.26	0.048828	0.097412	0.314575	0.413208	0.505737	0.549316	0.542114	0.689819
-26.46	-0.21368	-0.0434	0.218262	0.096069	0.12793	0.150452	-29.16	0.048828	0.085693	0.314575	0.413208	0.494019	0.536865	0.530396	0.682739
-26.36	-0.20667	-0.04108	0.225281	0.103088	0.134949	0.169189	-29.06	0.040283	0.093506	0.317749	0.404663	0.501831	0.544678	0.538208	0.690552
-26.26	-0.20667	-0.04108	0.228394	0.103088	0.134949	0.169189	-28.96	0.033203	0.085693	0.310669	0.397583	0.501831	0.544678	0.530396	0.690552
-26.16	-0.20667	-0.03326	0.221375	0.103088	0.134949	0.16449	-28.86	0.030029	0.093506	0.310669	0.397583	0.501831	0.544678	0.530396	0.678833
-26.06	-0.20355	-0.03326	0.221375	0.103088	0.134949	0.157471	-28.76	0.025391	0.093506	0.30603	0.394409	0.494019	0.532959	0.514038	0.678833
-25.96	-0.19885	-0.03796	0.221375	0.103088	0.127136	0.157471	-28.66	0.017578	0.093506	0.306763	0.389771	0.490845	0.532959	0.506958	0.675659
-25.86	-0.19885	-0.04028	0.221375	0.103088	0.127136	0.145752	-28.56	0.037109	0.100586	0.307495	0.401489	0.497925	0.532227	0.518677	0.674927
-25.76	-0.19885	-0.03796	0.221375	0.103088	0.115417	0.145752	-28.46	0.037109	0.090332	0.310669	0.389038	0.481567	0.525146	0.510864	0.674927
-25.66	-0.19885	-0.04498	0.218262	0.09137	0.115417	0.145752	-28.36	0.040283	0.088867	0.30603	0.385132	0.477661	0.525146	0.514038	0.666382
-25.56	-0.19885	-0.03326	0.213562	0.08667	0.115417	0.145752	-28.26	0.03711	0.093506	0.310669	0.386597	0.4823	0.525146	0.506958	0.666382
-25.46	-0.19885	-0.03326	0.213562	0.09137	0.110718	0.142639	-28.16	0.044922	0.093506	0.321655	0.397583	0.486938	0.532959	0.514771	0.667114
-25.36	-0.19885	-0.03326	0.213562	0.076538	0.103699	0.137939	-28.06	0.044922	0.093506	0.306763	0.397583	0.4823	0.52832	0.506958	0.659302
-25.26	-0.19885	-0.03326	0.211975	0.074951	0.106811	0.136352	-27.96	0.040283	0.093506	0.306763	0.397583	0.470581	0.509521	0.506958	0.647583
-25.16	-0.19885	-0.03326	0.209656	0.079651	0.111511	0.134033	-27.86	0.033203	0.093506	0.303589	0.389771	0.470581	0.509521	0.495239	0.647583
-25.06	-0.19885	-0.03796	0.209656	0.079651	0.111511	0.122314	-27.76	0.026124	0.098145	0.29187	0.397583	0.467407	0.506348	0.499879	0.640503
-24.96	-0.19885	-0.03717	0.209656	0.071838	0.111511	0.122314	-27.66	0.044922	0.116943	0.322388	0.401489	0.481567	0.521973	0.514038	0.659302
-24.86	-0.19885	-0.03717	0.221375	0.071838	0.111511	0.122314	-27.56	0.033936	0.116943	0.322388	0.389771	0.462769	0.517334	0.495239	0.648315
-24.76	-0.19885	-0.02545	0.216675	0.071838	0.111511	0.114502	-27.46	0.029297	0.112305	0.317749	0.389771	0.462769	0.505615	0.492065	0.643677
-24.66	-0.19415	-0.02075	0.211243	0.076538	0.113098	0.119202	-27.36	0.024658	0.105225	0.310669	0.389771	0.462769	0.505615	0.479614	0.631958
-24.56	-0.18713	-0.01373	0.213562	0.078857	0.115417	0.123108	-27.26	0.00586	0.105225	0.310669	0.386597	0.462769	0.505615	0.479614	0.631958
-24.46	-0.18713	-0.01843	0.213562	0.079651	0.115417	0.118408	-27.16	0.017578	0.093506	0.310669	0.374146	0.462769	0.493164	0.479614	0.619507
-24.36	-0.19025	-0.02856	0.210449	0.068726	0.112305	0.110596	-27.06	0.00586	0.090332	0.307495	0.369507	0.454956	0.474365	0.463257	0.612427
-24.26	-0.18323	-0.02155	0.212769	0.075744	0.114624	0.110595	-26.96	0.00903	0.081055	0.30603	0.365601	0.45813	0.477539	0.459351	0.603882
-24.16	-0.18012	-0.02155	0.208862	0.075745	0.102905	0.113708	-26.86	0.010498	0.085693	0.294312	0.358521	0.462769	0.482178	0.463989	0.608521
-24.06	-0.18713	-0.03326	0.198731	0.059326	0.095887	0.10669	-26.76	0.00586	0.085693	0.287231	0.358521	0.45813	0.482178	0.456177	0.608521
-23.96	-0.18243	-0.02856	0.19873	0.057007	0.108398	0.106689	-26.66	0.00586	0.073975	0.287231	0.358521	0.45105	0.482178	0.456177	0.600708
-23.86	-0.1723	-0.01843	0.204163	0.05072	0.11853	0.109802	-26.56	0.00586	0.073975	0.287231	0.358521	0.45105	0.470459	0.453003	0.600708
-23.76	-0.1676	-0.01373	0.201843	0.048401	0.120117	0.111389	-26.46	0.00122	0.077148	0.295044	0.363159	0.447144	0.470459	0.444458	0.596802
-23.66	-0.17462	-0.02075	0.194824	0.041382	0.108398	0.09967	-26.36		0.070068	0.282593	0.353882	0.447144	0.470459	0.444458	0.596802
-23.56	-0.1676	-0.01373	0.19873	0.045288	0.115417	0.101989	-26.26	-0.0105	0.070068	0.275513	0.346802	0.44397	0.45874	0.43982	0.596802
-23.46	-0.1723		0.194031	0.052307	0.110718	0.094971	-26.16	-0.02466	0.074707	0.280151	0.339722	0.436157	0.463379	0.437378	0.596802
-23.36	-0.18402	-0.01843	0.184631	0.031189	0.098999	0.090271	-26.06	-0.02222	0.077148	0.270874	0.342163	0.438599	0.454834	0.436646	0.584351
-23.26	-0.17462		0.187012	0.042175	0.108398	0.107483	-25.96	-0.01611	0.086426	0.276978	0.35144	0.447876	0.459473	0.433472	0.593628
-23.16	-0.19104	-0.01685	0.182312	0.032776	0.098999	0.09967	-25.86	-0.01367	0.098145	0.279419	0.350708	0.443237	0.466553	0.428833	0.588989
-23.06	-0.17621	-0.01532	0.180725	0.01947	0.095093	0.090271	-25.76		0.097412	0.2677	0.346069	0.438599	0.454834	0.428833	0.588989
-22.96	-0.19104	-0.03326	0.16748	0.00934	0.088867	0.087158	-25.66		0.097412	0.263062	0.338989	0.431519	0.450195	0.428833	0.577271
-22.86	-0.18634	-0.04028	0.16748	0.010925	0.084168	0.094971	-25.56	0.00269	0.102051	0.26062	0.343628	0.436157	0.447754	0.421753	0.581909
-22.76	-0.17932	-0.04108	0.158081	0.00854	0.081054	0.09497	-25.46	0.00513	0.104492	0.252075	0.346069	0.435425	0.437744	0.424194	0.576538
-22.66	-0.17151	-0.04498	0.16748	0.00934	0.084168	0.087158	-25.36		0.102051	0.244995	0.328735	0.428345	0.432861	0.41394	0.574097
-22.56	-0.15979	-0.03326	0.169799	0.021057	0.095886	0.091858	-25.26		0.109131	0.252075	0.331177	0.435425	0.430664	0.416382	0.578003
-22.46	-0.17151	-0.04187	0.147156	0.017151	0.08728	0.078552	-25.16		0.109131	0.252075	0.331177	0.419067	0.423584	0.409302	0.573364
-22.36	-0.15198	-0.03717	0.158875	0.02417	0.09198	0.07544	-25.06		0.109131	0.263794	0.335083	0.423706	0.435303	0.409302	0.573364
-22.26	-0.14728	-0.03558	0.17218	0.02185	0.09668	0.063721	-24.96		0.109131	0.247437	0.335083	0.41272	0.435303	0.409302	0.573364
-22.16	-0.14026	-0.03326	0.1745	0.02887	0.100586	0.07544	-24.86		0.112305	0.235718	0.333618	0.411255	0.430664	0.404663	0.568726
-22.06	-0.12543	-0.03015	0.172912	0.043701	0.098999	0.075439	-24.76		0.116943	0.240356	0.331177	0.415894	0.432129	0.409302	0.561646
-21.96	-0.12073	-0.03015	0.170593	0.048401	0.098999	0.075439	-24.66		0.112305	0.240356	0.331177	0.415894	0.415771	0.409302	0.561646
-21.86	-0.11603	-0.03247	0.160461	0.049988	0.09668	0.07544	-24.56		0.105225	0.240356	0.316284	0.404175	0.415771	0.397583	0.553833
-21.76	-0.11212	-0.02856	0.1745	0.052307	0.103698	0.072326	-24.46		0.113037	0.23645	0.319458	0.407349	0.423584	0.405396	0.549927
-21.66	-0.11212	-0.02856	0.16748	0.052307	0.108398	0.072327	-24.36		0.114502	0.241089	0.324097	0.404907	0.416504	0.402222	0.554565
-21.56	-0.1051	-0.02625	0.1698	0.052307	0.110718	0.086365	-24.26	0.00586	0.116943	0.244995	0.323364	0.404175	0.411133	0.397583	0.553833
-21.46	-0.10199	-0.03015	0.165894	0.052307	0.103699	0.077759	-24.16	0.00586	0.116943	0.240356	0.318726	0.404175	0.404053	0.397583	0.549194
-21.36	-0.1051	-0.03638	0.162781	0.044495	0.095886	0.072327	-24.06	0.00586	0.116943	0.240356	0.311646	0.401001	0.392334	0.394409	0.535034
-21.26	-0.09808	-0.04108	0.158081	0.039795	0.095886	0.062927	-23.96	0.00586	0.112305	0.235718	0.311646	0.396362	0.38916	0.392944	0.537476
-21.16	-0.1004	-0.02936	0.155762	0.037476	0.095886	0.057495	-23.86	0.00586	0.105225	0.220825	0.299927	0.380005	0.384521	0.386597	0.518677
-21.06	-0.1051	-0.04108	0.147949	0.029663	0.081055	0.055115	-23.76	0.00903	0.108398	0.223999	0.299927	0.376099	0.387695	0.385132	0.521851
-20.96	-0.10199	-0.03326	0.158081	0.028076	0.091186	0.048096	-23.66	0.025391	0.121582	0.228638	0.323364	0.392456	0.39624	0.389771	0.530396
-20.86	-0.09729	-0.03326	0.162781	0.029663	0.095886	0.048096	-23.56	0.022217	0.116943	0.228638	0.323364	0.384644	0.39624	0.389771	0.527222
-20.76	-0.09729	-0.03326	0.159668	0.020263	0.100586	0.052795	-23.46	0.00977	0.116943	0.228638	0.311646	0.380005	0.39624	0.389771	0.510864
-20.66	-0.1051	-0.04266	0.150269	0.00385	0.086487	0.033997	-23.36	0.00977	0.104492	0.228638	0.318726	0.361206	0.379883	0.378052	0.510864
-20.56	-0.09259	-0.03168	0.154968	0.00311	0.088867	0.026245	-23.26	0.00977	0.105225	0.228638	0.311646	0.361206	0.372803	0.378052	0.503052
-20.46	-0.10669	-0.04266	0.14325		0.079468	0.019959	-23.16	0.014404	0.102051	0.225464	0.316284	0.354858	0.369629	0.38269	0.495972
-20.36	-0.09961	-0.04028	0.14325	0.00153	0.077148	0.021545	-23.06	0.021485	0.109131	0.232544	0.32019	0.3573	0.376709	0.389771	0.503052
-20.26	-0.10901	-0.0481	0.131531	-0.01019	0.072449		-22.96	0.029297	0.105225	0.240356	0.323364	0.365112	0.384521	0.392944	0.510864
-20.16	-0.11212	-0.06061	0.125305	-0.01642	0.069336	-0.02222	-22.86	0.029297	0.105225	0.240356	0.307007	0.365112	0.369629	0.378052	0.503052
-20.06	-0.09027	-0.04968	0.130737	-0.01099	0.074768	-0.0105	-22.76	0.020752	0.108398	0.24353	0.303101	0.368286	0.368164	0.381226	0.494507
-19.96	-0.08557	-0.05121	0.140137		0.077148	-0.0105	-22.66	0.025391	0.101318	0.233276	0.307739	0.361206	0.372803	0.385864	0.499146
-19.86	-0.09729	-0.05438	0.13855	-0.01801	0.072449	-0.02692	-22.56	0.025391	0.101318	0.228638	0.307739	0.361206	0.372803	0.385864	0.487427
-19.76	-0.08948	-0.0567	0.14325	-0.01019	0.084167	-0.03705	-22.46	0.018311	0.098145	0.221558	0.312378	0.365845	0.365723	0.378784	0.492065
-19.66	-0.09729	-0.06451	0.13855	-0.01801	0.076355	-0.05115	-22.36	0.020752	0.105225	0.228638	0.311646	0.356567	0.372803	0.385864	0.491333
-19.56	-0.09729	-0.06763	0.147949	-0.01099	0.076355	-0.04407	-22.26	0.016846	0.09668	0.231812	0.303101	0.3573	0.371338	0.389038	0.494507
-19.46	-0.09888	-0.07391	0.158081	-0.02972	0.071655	-0.04334	-22.16	0.021484	0.09668	0.228638	0.303101	0.356567	0.361084	0.390503	0.487427
-19.36	-0.10663	-0.07855	0.152649	-0.02032	0.059204	-0.04095	-22.06	0.033203	0.0896	0.223999	0.296021	0.349487	0.361084	0.378052	0.479614
-19.26	-0.09888	-0.06921	0.158081		0.066955	-0.03394	-21.96	0.033203	0.0896	0.221558	0.292847	0.349487	0.361084	0.378052	0.474976
-19.16	-0.10901	-0.07623	0.158081	-0.01331	0.056824	-0.04175	-21.86	0.034668	0.086426	0.228638	0.292847	0.339233	0.365723	0.370972	0.460815
-19.06	-0.1012	-0.07153	0.155761		0.048218	-0.04565	-21.76	0.048828	0.105225	0.228638	0.323364	0.356567	0.369629	0.389771	0.479614
-18.96	-0.1004	-0.07233	0.159668	0.00153	0.054504	-0.04175	-21.66	0.037109	0.102051	0.228638	0.318726	0.361206	0.36499	0.385132	0.47644
-18.86	-0.1051	-0.06921	0.153381	0.013245	0.055237	-0.04175	-21.56	0.03711	0.097412	0.228638	0.311646	0.35022	0.357178	0.378052	0.467163
-18.76	-0.10901	-0.06763	0.13623	0.00153	0.042786	-0.05347	-21.46	0.041748	0.102051	0.225464	0.304565	0.35022	0.357178	0.38269	0.464722
-18.66	-0.11682	-0.07233	0.126831	0.00153	0.045105	-0.05658	-21.36	0.048828	0.109131	0.232544	0.311646	0.3573	0.357178	0.381958	0.460815
-18.56	-0.11212	-0.06763	0.124512		0.049805	-0.04956	-21.26	0.039551	0.112305	0.235718	0.314819	0.344116	0.348633	0.385132	0.450806
-18.46	-0.1098	-0.08484	0.128418		0.052124	-0.04956	-21.16	0.044922	0.124756	0.231812	0.327271	0.349487	0.361084	0.385864	0.467896
-18.36	-0.12854	-0.07935	0.119019		0.045105	-0.04956	-21.06	0.044922	0.124756	0.224731	0.315552	0.349487	0.361084	0.385864	0.456177
-18.26	-0.13165	-0.08875	0.100281		0.028687	-0.06128	-20.96	0.044922	0.124756	0.224731	0.315552	0.341675	0.353271	0.385864	0.44519
-18.16	-0.13794	-0.08795	0.103394		0.013855	-0.05505	-20.86	0.044922	0.124756	0.224731	0.304565	0.326782	0.348633	0.381226	0.440552
-18.06	-0.13556	-0.06451	0.10968	0.00934	0.018554	-0.0636	-20.76	0.044922	0.131836	0.225464	0.311646	0.333862	0.353271	0.38269	0.435913
-17.96	-0.14966	-0.06921	0.099487	0.00153	0.013061	-0.07068	-20.66	0.040283	0.113037	0.220825	0.311646	0.333862	0.341553	0.366333	0.421021
-17.86	-0.12775	-0.05511	0.112	0.00934	0.013855	-0.0636	-20.56	0.037842	0.114502	0.213745	0.304565	0.330688	0.346191	0.370972	0.425659
-17.76	-0.14026	-0.0575	0.104187	0.00153	0.00916	-0.05817	-20.46	0.044922	0.116943	0.220825	0.311646	0.32605	0.353271	0.378052	0.432739
-17.66	-0.12854	-0.0528	0.092468	0.00153	0.010742	-0.05347	-20.36	0.048096	0.120117	0.223999	0.302368	0.329224	0.345459	0.376587	0.424194
-17.56	-0.12854	-0.0575	0.095581			-0.05035	-20.26	0.052735	0.124756	0.223999	0.299927	0.333862	0.345459	0.366333	0.416382
-17.46	-0.11682	-0.05981	0.101868			-0.05188	-20.16	0.057373	0.120117	0.216919	0.307739	0.329956	0.353271	0.374146	0.405396
-17.36	-0.10742	-0.0481	0.108887			-0.04175	-20.06	0.044922	0.113037	0.216919	0.304565	0.329956	0.341553	0.370972	0.405396
-17.26	-0.10669	-0.04578	0.114319			-0.03864	-19.96	0.056641	0.121582	0.221558	0.311646	0.329224	0.353271	0.378052	0.409302
-17.16	-0.10742	-0.03638	0.112	0.00153	0.00372	-0.03235	-19.86	0.061279	0.109863	0.228638	0.311646	0.319702	0.35791	0.38269	0.402222
-17.06	-0.09027	-0.03094	0.104187	0.00464	0.00915	-0.03162	-19.76	0.052002	0.112305	0.216919	0.311646	0.329224	0.353271	0.378052	0.397583
-16.96	-0.08557	-0.02386	0.104187	0.010925	0.010742	-0.02924	-19.66	0.044922	0.108398	0.220093	0.303101	0.317505	0.348633	0.381226	0.392944
-16.86	-0.07935	-0.02313	0.112	0.011658	0.00916	-0.0191	-19.56	0.049561	0.105225	0.226196	0.324097	0.315063	0.35791	0.382691	0.390503
-16.76	-0.08008	-0.02075	0.108887	0.014038	0.018554		-19.46	0.056641	0.093506	0.220825	0.314819	0.322144	0.353271	0.389771	0.394409
-16.66	-0.08948	-0.02856	0.099487	0.017944	0.00916	-0.0144	-19.36	0.056641	0.093506	0.220825	0.307739	0.314331	0.345459	0.385132	0.389771
-16.56	-0.09418	-0.03796	0.092468	0.013245	0.00214	-0.0144	-19.26	0.056641	0.090332	0.220825	0.299927	0.302612	0.34082	0.366333	0.381958
-16.46	-0.0965	-0.03717	0.097168	0.021057	0.00995		-19.16	0.052002	0.085693	0.209106	0.285034	0.302612	0.322021	0.366333	0.370239
-16.36	-0.09729	-0.03796	0.079956	0.024963	0.013855	-0.0105	-19.06	0.03711	0.085693	0.209106	0.280396	0.283081	0.322021	0.358521	0.370239
-16.26	-0.09259	-0.04028	0.077637	0.029663	0.018555		-18.96	0.041748	0.085693	0.205933	0.277222	0.28772	0.318848	0.363159	0.367065
-16.16	-0.09027	-0.03638	0.081543	0.031982	0.017761	0.00122	-18.86	0.048828	0.078613	0.201294	0.267944	0.2948	0.311035	0.370239	0.362427
-16.06	-0.09729	-0.02625	0.079956	0.024963	0.022461	0.00122	-18.76	0.052002	0.088867	0.204468	0.264038	0.273804	0.301758	0.370239	0.349243
-15.96	-0.09729	-0.02466	0.084656	0.029663	0.02948	0.00122	-18.66	0.044922	0.081055	0.196655	0.256958	0.271362	0.294678	0.358521	0.338989
-15.86	-0.09729	-0.02936	0.084656	0.024963	0.02948	0.00122	-18.56	0.041748	0.073975	0.189575	0.256958	0.25647	0.294678	0.358521	0.338989
-15.76	-0.10199	-0.02625	0.079956	0.020264	0.024781	-0.0152	-18.46	0.037109	0.073975	0.177856	0.249146	0.251831	0.282959	0.358521	0.327271
-15.66	-0.10431	-0.02856	0.077637	0.017944	0.017761	-0.0105	-18.36	0.041748	0.071533	0.170776	0.242065	0.248657	0.279785	0.350708	0.324097
-15.56	-0.09729	-0.02155	0.084656	0.020263	0.00604	-0.02222	-18.26	0.047364	0.084229	0.18103	0.252319	0.258911	0.273682	0.342164	0.331177
-15.46	-0.09729	-0.02155	0.072937	0.024963	0.017761	-0.02533	-18.16	0.056641	0.085693	0.189575	0.268677	0.26355	0.275146	0.358521	0.331177
-15.36	-0.09418	-0.01843	0.068237	0.013245	0.017761	-0.02692	-18.06	0.056641	0.085693	0.177856	0.249146	0.26355	0.268066	0.358521	0.331177
-15.26	-0.08948	-0.01373	0.072937	0.013245	0.017761	-0.0191	-17.96	0.064453	0.086426	0.177856	0.256958	0.258911	0.282959	0.354614	0.319458
-15.16	-0.08948	-0.01373	0.061218	0.013245	0.00604	-0.0144	-17.86	0.059815	0.093506	0.177856	0.249146	0.240112	0.275146	0.346802	0.314819
-15.06	-0.08948	-0.02155	0.050293	0.013245	0.00604	-0.0144	-17.76	0.044922	0.085693	0.177856	0.249146	0.240112	0.263428	0.335083	0.299927
-14.96	-0.09259	-0.02155	0.045593	0.00543	0.00604	-0.0144	-17.66	0.044922	0.085693	0.177856	0.237427	0.228394	0.251709	0.331909	0.288208
-14.86	-0.08948	-0.01685	0.050293	0.00543	0.010742	-0.01282	-17.56	0.044922	0.073975	0.162964	0.237427	0.217407	0.239258	0.319458	0.288208
-14.76	-0.08557	-0.01453	0.052612	0.000732	0.013061	-0.01209	-17.46	0.046387	0.078613	0.158325	0.230347	0.220581	0.225098	0.324097	0.292847
-14.66	-0.09729	-0.02155	0.045593		0.00916	-0.0144	-17.36	0.060547	0.097412	0.16687	0.241333	0.244019	0.236084	0.331177	0.311646
-14.56	-0.08948	-0.02545	0.041687	0.00153	0.013855		-17.26	0.04419	0.097412	0.154419	0.241333	0.229126	0.236084	0.326538	0.299927
-14.46	-0.08948	-0.02545	0.041687	0.00153	0.013855		-17.16	0.037109	0.097412	0.1427	0.22644	0.216675	0.224365	0.311646	0.292114
-14.36	-0.08636	-0.02545	0.041687	0.00153	0.013855		-17.06	0.037109	0.097412	0.1427	0.213989	0.204956	0.224365	0.299927	0.292114
-14.26	-0.07697	-0.02075	0.046387	0.00623	0.011536		-16.96	0.033936	0.092773	0.1427	0.213989	0.204956	0.216553	0.299927	0.292114
-14.16	-0.06995	-0.01373	0.053406	0.013245	0.025574		-16.86	0.037109	0.093506	0.138794	0.210083	0.212769	0.209473	0.307739	0.288208
-14.06	-0.06604		0.057312	0.029663	0.037292	0.028564	-16.76	0.048828	0.081787	0.130981	0.202271	0.204956	0.204834	0.299927	0.280396
-13.96	-0.07776	-0.01373	0.045593	0.020264	0.025574	0.000428	-16.66	0.048828	0.070801	0.134155	0.190552	0.204956	0.197021	0.288208	0.280396
-13.86	-0.06134		0.045593	0.029663	0.037293	0.00513	-16.56	0.039551	0.061523	0.122437	0.185913	0.188599	0.180664	0.271851	0.260864
-13.76	-0.05902		0.045593	0.036682	0.025574	0.00513	-16.46	0.025391	0.066162	0.119263	0.182739	0.193237	0.173584	0.268677	0.253052
-13.66	-0.06134		0.045593	0.036682	0.025574	0.00513	-16.36	0.025391	0.066162	0.116089	0.182739	0.185425	0.165771	0.268677	0.253052
-13.56	-0.05432		0.040894	0.036682	0.025574	0.00513	-16.26	0.022217	0.061523	0.102905	0.171021	0.173706	0.165771	0.256958	0.253052
-13.46	-0.05432		0.045593	0.024963	0.025574	0.00513	-16.16	0.017578	0.054443	0.10437	0.154663	0.157349	0.165771	0.256958	0.241333
-13.36	-0.05902		0.033875	0.024963	0.025574	0.00513	-16.06	0.025391	0.050537	0.099731	0.147583	0.158081	0.161865	0.256958	0.241333
-13.26	-0.07306	0.0097	0.033875	0.024963	0.025574	0.00513	-15.96	0.020752	0.047363	0.091187	0.147583	0.150269	0.161865	0.256958	0.241333
-13.16	-0.06604	0.0097	0.033875	0.024963	0.017761	0.013733	-15.86	0.00659	0.049805	0.095825	0.135864	0.13855	0.154053	0.240601	0.229614
-13.06	-0.06604		0.033875	0.013245	0.017761		-15.76	0.025391	0.059082	0.096558	0.152222	0.150269	0.165771	0.237427	0.229614
-12.96	-0.05823		0.041687	0.021057	0.025573	0.00513	-15.66	0.022217	0.046631	0.091919	0.148315	0.139282	0.150879	0.222534	0.218628
-12.86	-0.05823		0.029968	0.00854	0.025574	0.00513	-15.56	0.017578	0.034912	0.0802	0.127319	0.122925	0.14624	0.217896	0.213989
-12.76	-0.05823		0.029968	0.00153	0.025574	0.00513	-15.46	0.017578	0.0271	0.077026	0.120239	0.122925	0.138428	0.203003	0.202271
-12.66	-0.05823		0.029968	0.00153	0.025574	0.00513	-15.36	0.01294	0.015381	0.072388	0.120239	0.115112	0.126709	0.193726	0.202271
-12.56	-0.05823		0.029968	0.00153	0.025574	0.00513	-15.26	0.00903	0.018555	0.075562	0.115601	0.118286	0.129883	0.186646	0.197632
-12.46	-0.05432	0.0058	0.041687	0.017944	0.037292	0.016845	-15.16	0.013672	0.027832	0.0802	0.120239	0.122925	0.129883	0.178833	0.197632
-12.36	-0.05432	0.00269	0.041687	0.024963	0.025574	0.00903	-15.06	0.00586	0.030273	0.083374	0.108521	0.111206	0.122803	0.178833	0.178833
-12.26	-0.05121		0.033875	0.013245	0.025574	0.00903	-14.96	0.013672	0.027832	0.07312	0.108521	0.111206	0.122803	0.167114	0.178833
-12.16	-0.05121		0.029175	0.00854	0.032593	0.00433	-14.86	0.013672	0.0271	0.071655	0.097534	0.099487	0.11499	0.167114	0.171021
-12.06	-0.06134	-0.02155	0.022156	0.00153	0.013855		-14.76	0.025391	0.038818	0.084839	0.092896	0.103394	0.134521	0.17102	0.171021
-11.96	-0.0434		0.033875	0.013244	0.025573	0.016845	-14.66	0.014404	0.035645	0.069214	0.089722	0.097046	0.123535	0.159302	0.167847
-11.86	-0.0387	0.0011	0.033875	0.013245	0.025574	0.016846	-14.56	0.00977	0.031006	0.064575	0.085083	0.087769	0.114258	0.159302	0.163208
-11.76	-0.04181	0.00739	0.038574	0.017944	0.041992	0.024658	-14.46	0.017578	0.038818	0.072388	0.092896	0.090942	0.11499	0.159302	0.159302
-11.66	-0.04181		0.033875	0.013245	0.025574	0.016846	-14.36	0.017578	0.0271	0.072388	0.081177	0.072144	0.11499	0.152222	0.159302
-11.56	-0.03479		0.033875	0.00854	0.025574	0.016846	-14.26	0.012939	0.03418	0.067749	0.076538	0.079224	0.098633	0.142944	0.146851
-11.46	-0.04651		0.022156	0.013245	0.025574	0.013733	-14.16	0.00586	0.0271	0.060669	0.069458	0.060425	0.088379	0.135864	0.139771
-11.36	-0.04651		0.022156	0.013245	0.025574	0.00903	-14.06	0.013672	0.015381	0.060669	0.069458	0.060425	0.08374	0.128052	0.128052
-11.26	-0.0434	-0.01843	0.022156	0.013245	0.025574	0.00903	-13.96	0.013672	0.015381	0.060669	0.061646	0.060425	0.08374	0.128052	0.120239
-11.16	-0.0387	-0.01685	0.022156	0.013245	0.025574	0.00903	-13.86	0.010498	0.015381	0.057495	0.058472	0.049439	0.080566	0.113159	0.117065
-11.06	-0.03168	-0.01453	0.021362	0.00854	0.032593	0.016052	-13.76	0.00586	0.015381	0.052856	0.053833	0.0448	0.075928	0.100708	0.112427
-10.96	-0.034	-0.02155	0.014343	0.00153	0.025574	0.00903	-13.66	0.00586	0.015381	0.048218	0.053833	0.0448	0.064209	0.100708	0.112427
-10.86	-0.02698	-0.02155	0.00262	0.00153	0.017761	0.00903	-13.56	0.00586	0.02002	0.045776	0.053833	0.0448	0.064209	0.088989	0.100708
-10.76	-0.01917	-0.01373	0.015137	0.00934	0.025573	0.016845	-13.46	0.00586	0.0271	0.048218	0.057007	0.033081	0.064209	0.088989	0.100708
-10.66	-0.01917	-0.01373	0.022156	0.00934	0.025574	0.016846	-13.36	0.00586	0.022461	0.041138	0.061646	0.033081	0.056397	0.081177	0.100708
-10.56	-0.02386	-0.01843	0.017456	0.00153	0.020874	0.012146	-13.26	0.00122	0.018555	0.044312	0.064819	0.036255	0.05957	0.077271	0.103882
-10.46	-0.01917	-0.01373	0.022156	0.00854	0.025574	0.016846	-13.16	0.014404	0.031738	0.057495	0.066284	0.041626	0.072754	0.097534	0.109253
-10.36	-0.01447	-0.01062	0.00964	0.00153	0.025574	0.016846	-13.06	0.00977	0.0271	0.049683	0.061646	0.025269	0.063477	0.092896	0.104614
-10.26			0.00262	-0.01019	0.020874	0.016846	-12.96	0.01294	0.030273	0.048218	0.064819	0.028442	0.05957	0.088257	0.096069
-10.16	-0.01056	-0.02075	0.00421	-0.01331	0.015442	0.00903	-12.86	0.00586	0.031738	0.041138	0.057739	0.021362	0.05249	0.081177	0.088989
-10.06	-0.01215	-0.02545			0.013062		-12.76	0.00586	0.015381	0.041138	0.057739	0.01355	0.05249	0.081177	0.088989
-9.96		-0.02545					-12.66	0.00586	0.0271	0.029419	0.057739	0.01355	0.040772	0.069458	0.088989
-9.86	0.00427	-0.02545			0.017761		-12.56	0.013672	0.0271	0.029419	0.054565	0.01355	0.037598	0.05774	0.081177
-9.76		-0.02856		0.00153	0.00604		-12.46	0.017578	0.038818	0.048218	0.053833	0.01355	0.044678	0.061646	0.081177
-9.66		-0.02625	-0.02161	-0.01099	0.00446		-12.36	0.017578	0.03418	0.029419	0.042114	0.01355	0.044678	0.061646	0.081177
-9.56		-0.03015	-0.01691	-0.01331		-0.0144	-12.26	0.012939	0.022461	0.036499	0.032837	0.00891	0.040039	0.057007	0.064819
-9.46		-0.03717	-0.01691	-0.01801		-0.0144	-12.16	0.00586	0.015381	0.0177	0.018677	0.00183	0.032959	0.049927	0.049927
-9.36	0.012085	-0.02936		-0.01019	0.00214		-12.06	0.00269	0.023193	0.029419	0.018677	0.00183	0.032959	0.041382	0.049927
-9.26	0.012085	-0.02936	-0.02081	-0.01019	0.00214		-11.96		0.023193	0.02478	0.018677		0.032959	0.046021	0.049927
-9.16	0.012085	-0.02466	-0.02081	-0.01019	0.00214	-0.0144	-11.86		0.023193	0.0177	0.018677		0.032959	0.046021	0.038208
-9.06	0.012085	-0.02234	-0.02863	-0.01019		-0.0144	-11.76	0.00586	0.02002	0.022339	0.026489		0.040772	0.04602	0.050659
-8.96	0.026916		-0.01691	-0.01019			-11.66	0.00269	0.012207	0.022339	0.020142	-0.01306	0.029785	0.031128	0.046753
-8.86	0.025391		-0.01691	-0.01331		-0.01752	-11.56		0.00757	0.013062	0.010864	-0.0177	0.020508	0.023315	0.042114
-8.76	0.015991	-0.01373	-0.02863	-0.01801		-0.02222	-11.46			0.00598	0.010864	-0.0177	0.013428	0.018677	0.042114
-8.66	0.019104	-0.01373	-0.02863	-0.02271		-0.02222	-11.36			0.00281	0.00623	-0.0177	0.018066	0.018677	0.030396
-8.56	0.023804	-0.01373	-0.02863	-0.01801	-0.01349	-0.02222	-11.26				0.00378	-0.02942	0.013428	0.018677	0.030396
-8.46	0.023804	-0.01373	-0.03174	-0.02972	-0.01349	-0.02222	-11.16	0.00977	0.012207	0.00525	0.014771	-0.0177	0.025147	0.030396	0.042114
-8.36	0.019104	-0.01843	-0.04114	-0.03442	-0.01819	-0.02692	-11.06	0.00122		-0.01355	0.00305	-0.02942	0.00879	0.010864	0.030396
-8.26	0.012085	-0.02545	-0.04816	-0.04144	-0.02521	-0.04175	-10.96				-0.01331	-0.02942	0.00171	0.010864	0.030396
-8.16	0.023804	-0.02545	-0.04425	-0.02972	-0.02521	-0.02222	-10.86		0.015381	0.00671		-0.0177	0.013428	0.010864	0.029663
-8.06	0.023804	-0.02545	-0.04425	-0.03754	-0.02521	-0.02692	-10.76		0.00366			-0.0177	0.013428	0.00623	0.010864
-7.96	0.031616	-0.01294	-0.03644	-0.02972	-0.0174	-0.0144	-10.66		0.0083	0.00208		-0.0177	0.013428	-0.01257	0.010864
-7.86	0.031616		-0.03644	-0.02972	-0.02991		-10.56	0.00586	0.015381	0.00208		-0.02551	0.013428	-0.02039	0.010864
-7.76	0.031616		-0.03333	-0.03674	-0.03693		-10.46	0.00586	0.015381			-0.02551	0.00562	-0.02039	0.010864
-7.66	0.036316	-0.01373	-0.04034	-0.02972	-0.03693	-0.0144	-10.36	0.00586	0.00757			-0.0177	0.00562	-0.02039	0.00305
-7.56	0.043335	-0.01062	-0.04346	-0.02972	-0.04865	-0.0144	-10.26	0.00586	0.00757			-0.02551		-0.02039	0.00305
-7.46	0.043335		-0.04816	-0.02972	-0.04865	-0.0144	-10.16	0.01294	0.00757			-0.02551		-0.0321
-7.36	0.031616		-0.04504	-0.02972	-0.05646	-0.0144	-10.06			-0.01672	-0.02039	-0.03723	-0.021	-0.04382	-0.02356
-7.26	0.055053	0.010498	-0.02863	-0.02271	-0.04474		-9.96	0.00586			-0.01331	-0.02551	-0.01392	-0.03992	-0.01648
-7.16	0.048035	0.010498	-0.04346	-0.02502	-0.05176	-0.02142	-9.86	0.00586			-0.02039	-0.02551	-0.01392	-0.03992	-0.01648
-7.06	0.069885	0.029236	-0.02472		-0.02832		-9.76	0.00269	-0.01196	-0.01428	-0.02039	-0.02551	-0.01392	-0.03528	-0.0282
-6.96	0.082398	0.029236	-0.03644	0.00543	-0.03302		-9.66			-0.02136	-0.02039	-0.02551	-0.03027	-0.03992	-0.0282
-6.86	0.079285	0.017517	-0.03644		-0.03302		-9.56			-0.02136	-0.02039	-0.02551	-0.03735	-0.03674	-0.04065
-6.76	0.082397	0.02533	-0.02863	0.00153	-0.02521	0.00513	-9.46			-0.02454	-0.0321	-0.02551	-0.04517	-0.0321	-0.04309
-6.66	0.094116	0.030029	-0.02863	0.00153	-0.02991	0.00513	-9.36		0.00366	-0.02917	-0.02747	-0.0177	-0.03735	-0.02429	-0.0282
-6.56	0.082398	0.029236	-0.02863	0.00153	-0.02521		-9.26		0.0083	-0.02917	-0.0321	-0.0177	-0.03735	-0.02429	-0.03284
-6.46	0.094116	0.032349	-0.03644	-0.01019	-0.02521		-9.16	-0.01367	0.00366	-0.02917	-0.02893	-0.0177	-0.03735	-0.0321	-0.05164
-6.36	0.094116	0.037048	-0.03644		-0.03223		-9.06	-0.01367	0.00366	-0.02136	-0.02429	-0.0177	-0.03735	-0.02747	-0.05164
-6.26	0.094116	0.037048	-0.03644	0.00153	-0.02521	0.00201	-8.96	0.00513	0.015381	-0.02209	-0.01257		-0.02563	-0.02502	-0.03992
-6.16	0.094116	0.041748	-0.03644		-0.03302	0.00903	-8.86		0.015381	-0.02136	-0.02039		-0.03735	-0.02039	-0.04773
-6.06	0.094116	0.048767	-0.03644		-0.03302	0.00433	-8.76		0.00757	-0.02136	-0.02039		-0.03735	-0.0321	-0.04773
-5.96	0.082398	0.037048	-0.03644		-0.03302		-8.66		0.00757	-0.02136	-0.02039		-0.03735	-0.0321	-0.05945
-5.86	0.08551	0.040161	-0.03333		-0.04163	0.000427	-8.56		0.00757	-0.03235	-0.02039		-0.03735	-0.0321	-0.05945
-5.76	0.09021	0.044861	-0.03564		-0.03693	0.00513	-8.46			-0.03381	-0.02039	-0.01379	-0.03735	-0.0321	-0.06726
-5.66	0.101929	0.044861	-0.02863		-0.03693	0.00513	-8.36			-0.03235	-0.02747	-0.01379	-0.04517	-0.03992	-0.06726
-5.56	0.094116	0.041748	-0.03644		-0.02832	0.00201	-8.26	-0.0105		-0.03381	-0.01721		-0.04199	-0.03674	-0.05945
-5.46	0.09021	0.05188	-0.04816	-0.01019	-0.03302		-8.16	-0.01758	-0.0127	-0.03772	-0.02893	-0.02161	-0.04907	-0.04382	-0.06409
-5.36	0.093323	0.059692	-0.04504	0.00934	-0.02991	0.00513	-8.06	-0.02075	-0.01978	-0.03308	-0.04382	-0.02161	-0.04907	-0.04382	-0.08289
-5.26	0.098022	0.064392	-0.04034	0.021057	-0.03693	0.016846	-7.96	-0.02856	-0.02295	-0.02844	-0.03455	-0.01697	-0.04443	-0.03918	-0.07361
-5.16	0.102722	0.073792	-0.03564	0.014038	-0.03223	0.021545	-7.86	-0.02612	-0.01587	-0.02136	-0.03992		-0.03735	-0.04382	-0.07581
-5.06	0.12146	0.08783	-0.02863	0.032776	-0.02521	0.016845	-7.76	-0.01367		-0.01282	-0.0282		-0.02563	-0.03528	-0.07117
-4.96	0.118347	0.076111	-0.02863	0.016357	-0.02521	0.019959	-7.66	-0.02148		-0.01746	-0.0282	0.00183	-0.04053	-0.03992	-0.07117
-4.86	0.11676	0.090942	-0.03723	0.02417	-0.02209	0.019959	-7.56	-0.0332	-0.03076	-0.02917	-0.03992		-0.05688	-0.05164	-0.08289
-4.76	0.109741	0.095642	-0.03253	0.02887	-0.0174	0.024658	-7.46	-0.02539	-0.0354	-0.02917	-0.03992		-0.05688	-0.06335	-0.08289
-4.66	0.128479	0.095642	-0.02081	0.040588		0.036377	-7.36	-0.02539	-0.04395	-0.04089	-0.05164		-0.05688	-0.06335	-0.0907
-4.56	0.12146	0.095642	-0.02081	0.040588		0.033264	-7.26	-0.02539	-0.04248	-0.04089	-0.05164	-0.0177	-0.05688	-0.06799	-0.0907
-4.46	0.114441	0.103455	-0.02393	0.045288		0.036377	-7.16	-0.02539	-0.04712	-0.04089	-0.05164	-0.0177	-0.05688	-0.08289	-0.0907
-4.36	0.133179	0.123779	-0.01691	0.057007	0.00604	0.048096	-7.06	-0.02539	-0.04248	-0.04089	-0.047	-0.02014	-0.05225	-0.07825	-0.08606
-4.26	0.138672	0.122986	-0.01611	0.057007		0.048889	-6.96	-0.02539	-0.0354	-0.04089	-0.04773		-0.04517	-0.07117	-0.07898
-4.16	0.156616	0.143311	-0.01691	0.056213		0.059815	-6.86	-0.02539	-0.04321	-0.04089	-0.04773		-0.05298	-0.08289	-0.0907
-4.06	0.15503	0.133911	-0.04114	0.050721	-0.01819	0.062928	-6.76	-0.01685	-0.04321	-0.04089	-0.04773	-0.0177	-0.05298	-0.08289	-0.0907
-3.96	0.15271	0.134705	-0.02863	0.057007		0.07544	-6.66	-0.01831	-0.03223	-0.03772	-0.04456	-0.02234	-0.0498	-0.07971	-0.09216
-3.86	0.153503	0.139404	-0.02393	0.057007		0.084839	-6.56	-0.01367	-0.0354	-0.03308	-0.05164	-0.0177	-0.06152	-0.08289	-0.09778
-3.76	0.159729	0.133911	-0.01691	0.059326	0.013062	0.081665	-6.46	-0.02539	-0.03223	-0.03308	-0.05164	-0.0177	-0.0686	-0.08289	-0.09534
-3.66	0.160522	0.11908	-0.02161	0.052307	0.00604	0.062927	-6.36	-0.01367	-0.02759	-0.03625	-0.05164	-0.02942	-0.06396	-0.08289	-0.10242
-3.56	0.15741	0.115173	-0.02081	0.052308	0.00684	0.060608	-6.26		-0.02295	-0.04797	-0.047	-0.02478	-0.05225	-0.0946	-0.09778
-3.46	0.135499	0.107361	-0.01611	0.035889	0.020875	0.048096	-6.16		-0.01904	-0.04089	-0.03992	-0.02551	-0.04517	-0.0946	-0.09387
-3.36	0.114441	0.08783		0.018738	0.018555	0.041077	-6.06		-0.02368	-0.04089	-0.04773	-0.02551	-0.05762	-0.0946	-0.11023
-3.26	0.113648	0.05658	-0.02472	0.015565	0.013062	0.043397	-5.96	0.00903	-0.02368	-0.04089	-0.04773	-0.02551	-0.0647	-0.0946	-0.11023
-3.16	0.101929	0.061279	-0.03333	-0.01019		0.04419	-5.86	0.016846	-0.02051	-0.03772	-0.05627	-0.02234	-0.07324	-0.10242	-0.10706
-3.06	0.108948	0.055786	-0.05676		-0.01428	0.032471	-5.76	0.010498	-0.02368	-0.04089	-0.05945	-0.02551	-0.07642	-0.11023	-0.11023
-2.96	0.090211	0.021423	-0.0755	-0.01099	-0.03302	0.00433	-5.66	0.013672	-0.01587	-0.02991	-0.05164	-0.0177	-0.08032	-0.09924	-0.10242
-2.86	0.069885	-0.02313	-0.10754	-0.05707	-0.06976	-0.03473	-5.56	0.010498	-0.02368	-0.03943	-0.05481	-0.03259	-0.0835	-0.1095	-0.10559
-2.76	0.033204	-0.07074	-0.15363	-0.0719	-0.09393	-0.0636	-5.46	0.017578	-0.02368	-0.03381	-0.05945	-0.02551	-0.07178	-0.1134	-0.10315
-2.66	-0.06531	-0.11768	-0.21771	-0.09851	-0.14478	-0.1355	-5.36	0.00977	-0.0354	-0.04089	-0.05627	-0.03333	-0.0647	-0.11804	-0.1134
-2.56	-0.19812	-0.27625	-0.41773	-0.10553	-0.32367	-0.30273	-5.26	0.00977	-0.0354	-0.04089	-0.05945	-0.04504	-0.06152	-0.11804	-0.11804
-2.46	0.083969	-0.1684	-0.35443	-0.08522	-0.31587	-0.14253	-5.16	0.020752	-0.03076	-0.03308	-0.03918	-0.03406	-0.05688	-0.10706	-0.11023
-2.36	0.432373	0.101135	0.024475	-0.11957	-0.03613	0.151245	-5.06	0.020752	-0.04004	-0.04089	-0.04456	-0.04578	-0.06152	-0.11878	-0.11487
-2.26	0.273805	-0.03717	-0.01221	-0.18207		0.033265	-4.96	0.013672	-0.04712	-0.04089	-0.05164	-0.05286	-0.0686	-0.12585	-0.12195
-2.16	0.213623	-0.01373	0.01355	-0.13129	0.027893	0.012146	-4.86	0.00195	-0.04712	-0.04089	-0.06335	-0.05286	-0.0686	-0.12585	-0.12195
-2.06	0.151917		-0.06067	-0.0852	-0.02991	-0.01129	-4.76	0.018311	-0.03076	-0.03625	-0.05872	-0.05603	-0.06396	-0.11658	-0.11414
-1.96	0.110533	0.00189	-0.07782	0.014036	-0.04706	0.022337	-4.66	0.013672	-0.02368	-0.04089	-0.05164	-0.06067	-0.05225	-0.11414	-0.11023
-1.86	0.074585	-0.0575	-0.09662	0.02417	-0.05725	0.048889	-4.56	0.01831	-0.02368	-0.04089	-0.047	-0.06067	-0.04517	-0.11414	-0.11023
-1.76	0.113647	-0.11218	-0.16144	0.021057	-0.06348	0.078552	-4.46	0.017578	-0.03613	-0.04553	-0.04773	-0.07629	-0.05298	-0.12195	-0.11804
-1.66	0.180054	-0.11609	-0.18097	0.036682		0.107483	-4.36	0.01294	-0.04785	-0.05334	-0.06018	-0.08801	-0.05444	-0.1344	-0.1344
-1.56	0.21991	-0.01141	-0.08881	0.081239	0.031068	0.130128	-4.26	0.00586	-0.06665	-0.08386	-0.08362	-0.10754	-0.0686	-0.1532	-0.1532
-1.46	0.223024	0.123779	0.121338	0.094484	0.060732	0.105898	-4.16		-0.08618	-0.09094	-0.11023	-0.13171	-0.08813	-0.17737	-0.1759
-1.36	0.21521	0.226135	0.293274	0.128113	0.089661	0.080933	-4.06		-0.08936	-0.07996	-0.11023	-0.13879	-0.08813	-0.19543	-0.18054
-1.26	0.230835	0.326111	0.370605	0.177307	0.131043	0.074646	-3.96	0.00342	-0.08618	-0.07922	-0.11731	-0.14905	-0.09839	-0.19934	-0.1759
-1.16	0.242554	0.360474	0.339355	0.228088	0.157593	0.102783	-3.86	0.032471	-0.07056	-0.05652	-0.08679	-0.1427	-0.07251	-0.19299	-0.1571
-1.06	0.240968	0.281555	0.169801	0.19214	0.165407	0.124635	-3.76	0.025391	-0.0791	-0.06042	-0.09851	-0.14661	-0.08423	-0.19226	-0.14929
-0.96	0.15662	0.131592	-0.01379	0.048405	0.021671	0.037174	-3.66	0.041748	-0.07837	-0.06042	-0.09534	-0.12708	-0.07642	-0.19544	-0.13757
-0.86	0.144897	0.07843	-0.10364	-0.02271	0.00604	-0.02692	-3.56	0.048829	-0.07764	-0.04871	-0.09387	-0.13489	-0.08423	-0.20007	-0.13757
-0.76	0.094115	0.088623	-0.16925	-0.02893		-0.08002	-3.46	0.063721	-0.05493	-0.02917	-0.07898	-0.12317	-0.06934	-0.18835	-0.12585
-0.66	0.061279	0.051086	-0.16065		0.016174	-0.12616	-3.36	0.087891	-0.0354		-0.05945	-0.10364	-0.07642	-0.18835	-0.11804
-0.56	-0.12304	-0.12152	-0.17627	-0.2633	-0.07989	-0.16363	-3.26	0.103516	-0.02051	0.00525	-0.04138	-0.09265	-0.06543	-0.16565	-0.09534
-0.46	0.153503	-0.01062	-0.03955	-0.07892	0.042785		-3.16	0.112061	-0.01904	0.00671	-0.05481	-0.09119	-0.07886	-0.18054	-0.09387
-0.36	0.305054	0.279236	0.322144	0.342896	1.00525	0.182434	-3.06	0.119141	-0.01196	0.00208	-0.05481	-0.10364	-0.07251	-0.19226	-0.08679
-0.26	0.87225	-0.11139	4.95728	-0.11408	7.92089	8.50128	-2.96	0.126953		0.013062	-0.0282	-0.09583	-0.07251	-0.18054	-0.07898
-0.16	-0.3559	0.219116	-0.95752	1.04297	-0.87598	2.97467	-2.86	0.126953		0.0177	-0.03992	-0.09265	-0.07324	-0.19226	-0.07898
-0.06	0.010311	0.615173	-0.86786	1.20288	-0.2934	0.693233	-2.76	0.134034	0.019287	0.029419	-0.01648	-0.08411	-0.06006	-0.18054	-0.0719
0.039997	0.275342	0.126892	-0.05676	0.328809	0.892712	1.68947	-2.66	0.158203	0.017822	0.044312	-0.02112	-0.08093	-0.05762	-0.17346	-0.0719
0.139999	0.374573	0.466736	0.210388	0.715576	1.59351	2.78711	-2.56	0.143311	0.0083	0.034058	-0.03992	-0.09119	-0.06714	-0.18762	-0.08606
0.239998	0.526922	0.380005	0.567444	0.686651	1.9701	3.41138	-2.46	0.138672	0.00757	0.034058	-0.04309	-0.099	-0.06934	-0.20007	-0.09851
0.34	0.49176	0.457397	0.829224	0.963257	2.41541	4.38251	-2.36	0.137207	0.00757	0.05603	-0.03284	-0.10828	-0.08887	-0.20007	-0.09534
0.439999	0.540166	0.516724	0.789312	1.12262	3.04902	5.28559	-2.26	0.138673		0.0802	-0.02429	-0.11609	-0.09912	-0.19617	-0.09387
0.539997	0.49573	0.560486	0.881531	1.40076	3.51465	6.26294	-2.16	0.146484	0.0061	0.099731	-0.02039	-0.13171	-0.11231	-0.22107	-0.08826
0.639999	0.449585	0.48938	0.970581	1.68121	3.91467	7.14423	-2.06	0.170657	0.034912	0.138794		-0.11926	-0.11939	-0.21887	-0.07117
0.739998	0.516786	0.510498	1.11981	1.99371	4.44745	8.12311	-1.96	0.227783	0.073975	0.202026	0.022583	-0.08801	-0.05688	-0.19226	-0.04309
0.84	0.526917	0.540161	1.24011	2.33978	4.83728	8.89026	-1.86	0.205078	0.023926	0.177124	-0.0282	-0.13025	-0.05298	-0.1571	-0.08679
0.939999	0.512086	0.576111	1.41827	2.65857	5.29981	9.68952	-1.76	0.201904	-0.03149	0.116089	-0.06726	-0.1427	-0.07251	-0.16101	-0.08362
1.04	0.484742	0.630798	1.52448	2.91089	5.75134	10.4293	-1.66	0.209717	-0.01123	0.099731	-0.05872	-0.13098	-0.07642	-0.16101	-0.05872
1.14	0.42926	0.619873	1.61749	3.07654	6.18573	11.1309	-1.56	0.247315	0.03418	0.08728	-0.01331	-0.08801	-0.06934	-0.15393	-0.0282
1.24	0.477721	0.688599	1.76746	3.34369	6.65448	11.8567	-1.46	0.251099	0.054443	0.088013	0.018677	-0.06067	-0.09521	-0.13684
1.34	0.519104	0.764404	1.91748	3.58826	7.16309	12.5911	-1.36	0.208252	0.03418	0.071655	0.022583	-0.04187	-0.10059	-0.18604
1.44	0.528504	0.802673	2.03699	3.80542	7.64667	13.3098	-1.26	0.131715	0.00842	0.030273	-0.0282	-0.05444	-0.15686	-0.23828	-0.03906
1.54	0.543334	0.884705	2.18622	4.06793	8.06854	14.0356	-1.16	0.111328	0.031738	0.021606	-0.03528	-0.04199	-0.13977	-0.27039	-0.03528
1.64	0.558167	0.944092	2.28387	4.26324	8.48181	14.7004	-1.06	0.051148	0.033325	-0.03076	-0.05322	-0.04895	-0.16626	-0.2594	-0.04846
1.74	0.586304	1.005	2.40887	4.51715	8.88885	15.4067	-0.96	-0.03711	0.020874	-0.09558	-0.06567	-0.04895	-0.20606	-0.29773	-0.03906
1.84	0.593323	1.05658	2.50262	4.76636	9.28339	16.0442	-0.86	-0.07617		-0.12756	-0.06885	-0.01453	-0.22168	-0.33362	-0.06104
1.94	0.630065	1.1355	2.6745	5.04138	9.72168	16.6106	-0.76	-0.03711	0.047485	-0.09082	-0.01563	0.026123	-0.21228	-0.30469	-0.02661
2.04	0.655823	1.18549	2.78699	5.27808	10.142	17.1411	-0.66	-0.05273	0.0271	-0.07141	-0.10718	0.010376	-0.29993	-0.34387	-0.03137
2.14	0.684753	1.24017	2.89795	5.50623	10.5498	17.6278	-0.56	-0.04028	-0.01196	-0.09631	-0.1759	-0.01453	-0.3584	-0.22668	-0.11182
2.24	0.718323	1.28235	3.01434	5.75855	10.9232	18.102	-0.46	-0.01758	-0.07837	-0.02771	-0.17664	0.029175	-0.30542	-0.12744	-0.04626
2.34	0.716003	1.3183	3.13544	5.9906	11.3068	18.5746	-0.36	-0.0918	-0.26904	-0.04944	-0.25244	0.116699	-0.21545	-0.32434	-0.15393
2.44	0.742554	1.37219	3.24793	6.21948	11.6967	19.0676	-0.26	-0.36522	-0.11597	-0.26831	-0.24622	-0.25366	-0.12183	-0.38133	-0.49231
2.54	0.801147	1.4433	3.39325	6.46558	12.092	19.5247	-0.16	-0.3551		-0.21985	-0.50085	-0.94739	-0.17017	-1.07275	-1.76025
2.64	0.83551	1.47455	3.52686	6.71326	12.4709	20.0004	-0.06	-0.13404	-0.07129	-0.25256	-0.3009	-0.64978	-0.41858	-1.19544	-3.02356
2.74	0.861328	1.5105	3.67059	6.98199	12.8662	20.4247	0.040001	0.142578	-0.07288	-0.13147	-0.33447	-0.77319	-0.88269	-1.78601	-5.03369
2.84	0.901917	1.5683	3.81512	7.22729	13.2592	20.8707	0.139999	0.047363	-0.22363	-0.18298	-0.61255	-0.89111	-1.28882	-2.60547	-6.3313
2.94	0.922242	1.61047	3.92371	7.44373	13.6201	21.2747	0.240002	0.108997	-0.40344	-0.50574	-0.97046	-1.05762	-1.6936	-3.261	-6.8689
3.04	0.926941	1.63159	4.04327	7.6781	13.9717	21.6981	0.34	-0.07617	-0.38696	-0.3894	-1.08765	-1.10754	-1.93579	-3.47119	-6.58142
3.14	0.953491	1.66595	4.1745	7.91168	14.3264	22.0942	0.440002	-0.10352	-0.3877	-0.41589	-1.10864	-1.00757	-1.94043	-3.22742	-6.12427
3.24	0.999572	1.72845	4.29559	8.1734	14.6732	22.5059	0.540001	0.014404	-0.17139	-0.27136	-0.87195	-0.83411	-1.64673	-2.96887	-5.53064
3.34	1.0285	1.7605	4.41278	8.39917	14.9865	22.8754	0.639999	0.064453	-0.16821	-0.22058	-0.69934	-0.75134	-1.46082	-2.56104	-4.88135
3.44	1.05817	1.82141	4.53699	8.62262	15.3177	23.2356	0.740002	0.142575	-0.11353	-0.13538	-0.5907	-0.59656	-1.25293	-2.28675	-4.12268
3.54	1.07928	1.86908	4.66748	8.85779	15.6639	23.6301	0.84	0.158203	-0.10645	-0.07214	-0.52893	-0.54968	-1.14209	-2.01331	-3.45166
3.64	1.10034	1.91907	4.79871	9.08667	16.0045	24.0074	0.940002	0.10742	-0.14014	-0.06042	-0.54309	-0.48181	-1.05371	-1.69299	-2.79065
3.74	1.1488	1.96283	4.93542	9.31012	16.3224	24.3645	1.04	0.126953	-0.10645	-0.04407	-0.47351	-0.38953	-0.88574	-1.37122	-2.04846
3.84	1.18005	2.0105	5.06122	9.52808	16.6201	24.6458	1.14	0.146484	-0.05029	0.00989	-0.39221	-0.25208	-0.72022	-1.03284	-1.28601
3.94	1.216	2.0683	5.20654	9.72888	16.931	24.9465	1.24	0.154294	-0.04785	0.00525	-0.35632	-0.21692	-0.5896	-0.74695	-0.62585
4.04	1.25427	2.12689	5.34247	9.95465	17.2326	25.1934	1.34	0.154297	-0.03857	0.021606	-0.32666	-0.19348	-0.5022	-0.45947	0.060913
4.14	1.2785	2.16284	5.47296	10.1695	17.535	25.4512	1.44	0.158202	-0.01343	0.044312	-0.25867	-0.15906	-0.37793	-0.15784	0.712524
4.24	1.30817	2.22845	5.60809	10.4039	17.8381	25.72	1.54	0.158936	0.00513	0.053589	-0.22278	-0.09119	-0.23657	0.15686	1.39905
4.34	1.32379	2.27063	5.72839	10.6062	18.1302	25.9567	1.64	0.161377	0.041992	0.109985	-0.15857	0.0011	-0.0686	0.474976	2.10315
4.44	1.35663	2.323	5.85419	10.8265	18.4521	26.213	1.74	0.161376	0.05835	0.127808	-0.10169	0.047119	0.068115	0.784301	2.79211
4.54	1.37457	2.38	5.98621	11.0437	18.7201	26.4465	1.84	0.178467	0.092773	0.165405	-0.03284	0.096314	0.224365	1.1156	3.49133
4.64	1.41052	2.43549	6.10028	11.264	19.006	26.677	1.94	0.216796	0.108398	0.216919	0.064819	0.196411	0.375244	1.44836	4.19055
4.74	1.43005	2.47455	6.20966	11.4625	19.2904	26.9075	2.04	0.209717	0.156738	0.252808	0.149048	0.248657	0.542236	1.77332	4.89758
4.84	1.44958	2.54486	6.32373	11.6812	19.5724	27.1411	2.14	0.248047	0.18335	0.302856	0.236694	0.340942	0.727539	2.12805	5.60852
4.94	1.48083	2.57922	6.44403	11.8875	19.7717	27.3567	2.24	0.287109	0.199707	0.352905	0.335815	0.428345	0.904053	2.47107	6.33899
5.04	1.50818	2.62299	6.54169	12.1039	20.0217	27.5606	2.34	0.267578	0.206787	0.393433	0.404663	0.505737	1.05713	2.81238	7.00769
5.14	1.51678	2.67377	6.65417	12.3101	20.2717	27.7543	2.44	0.255127	0.234863	0.412231	0.480347	0.556519	1.21655	3.15466	7.69763
5.24	1.53943	2.73236	6.76044	12.5406	20.5139	27.9543	2.54	0.263672	0.256104	0.43811	0.553101	0.637817	1.37988	3.50696	8.40149
5.34	1.5824	2.78003	6.88623	12.732	20.7521	28.1411	2.64	0.264404	0.286377	0.452759	0.624146	0.712769	1.52979	3.8468	9.078
5.44	1.61444	2.8222	7.00732	12.9359	20.999	28.3348	2.74	0.260497	0.296631	0.481812	0.69519	0.771362	1.67822	4.18664	9.75305
5.54	1.64801	2.88	7.11902	13.1492	21.1974	28.5043	2.84	0.259766	0.288818	0.498169	0.780396	0.85022	1.8291	4.48743	10.421
5.64	1.67224	2.90424	7.22449	13.3297	21.424	28.6801	2.94	0.270751	0.307617	0.522339	0.861694	0.934692	1.98218	4.8241	11.0961
5.74	1.70349	2.97455	7.35028	13.5328	21.6779	28.845	3.04	0.262939	0.331055	0.575562	0.948364	1.00891	2.14941	5.16956	11.7804
5.84	1.72302	3.02533	7.46436	13.7203	21.9045	28.963	3.14	0.268311	0.336426	0.583374	1.00696	1.06506	2.28296	5.49988	12.4601
5.94	1.76208	3.07611	7.59247	13.9234	22.1302	29.0989	3.24	0.267577	0.36377	0.60437	1.09753	1.151	2.42041	5.84753	13.1483
6.04	1.79333	3.11517	7.71826	14.1031	22.3459	29.2543	3.34	0.251221	0.362305	0.634155	1.16638	1.21985	2.54785	6.17419	13.8265
6.14	1.81287	3.15424	7.84637	14.2906	22.5576	29.4075	3.44	0.260497	0.394287	0.662964	1.24915	1.27136	2.70093	6.48743	14.5109
6.24	1.85193	3.1972	7.96667	14.4695	22.7631	29.5528	3.54	0.248047	0.397461	0.677856	1.31165	1.34167	2.85327	6.79529	15.1788
6.34	1.86365	3.24408	8.112	14.6469	22.9435	29.6528	3.64	0.259033	0.418457	0.709106	1.41394	1.42371	3.01807	7.12805	15.8702
6.44	1.87848	3.29486	8.23309	14.8414	23.1349	29.7864	3.74	0.265137	0.430176	0.748169	1.49597	1.49866	3.17041	7.46082	16.5468
6.54	1.91052	3.34564	8.362	15.0523	23.3146	29.9075	3.84	0.279297	0.437256	0.79895	1.56555	1.55652	3.3291	7.7804	17.2257
6.64	1.93945	3.3941	8.48077	15.2172	23.5068	30.0051	3.94	0.285645	0.467041	0.849731	1.63904	1.63	3.50879	8.13513	17.9008
6.74	1.98474	3.45422	8.60419	15.4187	23.7248	30.1426	4.04	0.294922	0.45752	0.877075	1.69055	1.70105	3.66968	8.46082	18.5812
6.84	2.01599	3.48627	8.72058	15.6078	23.9084	30.2739	4.14	0.302734	0.482666	0.923218	1.77576	1.76672	3.81738	8.80627	19.2828
6.94	2.03162	3.51752	8.82294	15.7828	24.0646	30.3762	4.24	0.326172	0.511475	0.959106	1.87024	1.86438	4.01343	9.14368	19.9796
7.04	2.07458	3.56439	8.95184	15.9773	24.2365	30.5137	4.34	0.326904	0.531006	0.98645	1.94836	1.94714	4.1665	9.47571	20.6476
7.14	2.11365	3.62378	9.08466	16.1617	24.3967	30.6301	4.44	0.345703	0.542725	1.03723	2.0304	2.02917	4.33374	9.82336	21.3156
7.24	2.1449	3.65344	9.21356	16.3414	24.5646	30.7512	4.54	0.345703	0.554443	1.06848	2.10071	2.11121	4.4939	10.1554	22.0187
7.34	2.17615	3.70892	9.32764	16.5211	24.7248	30.8442	4.64	0.360596	0.578613	1.10754	2.19055	2.18933	4.65405	10.507	22.7101
7.44	2.19568	3.7558	9.4245	16.7007	24.9162	30.9661	4.74	0.376953	0.605225	1.15833	2.27258	2.25964	4.82593	10.8546	23.3898
7.54	2.23474	3.8183	9.52606	16.8531	25.0881	31.0481	4.84	0.389403	0.624756	1.19739	2.35071	2.34167	5.01343	11.2062	24.089
7.64	2.26129	3.86908	9.63855	17.0015	25.2482	31.1544	4.94	0.396484	0.632568	1.22473	2.4093	2.42761	5.15405	11.5538	24.7655
7.74	2.2738	3.90814	9.74481	17.1617	25.3849	31.2543	5.04	0.404297	0.648926	1.26453	2.48816	2.49475	5.31885	11.8905	25.4764
7.84	2.31598	3.95032	9.862	17.3367	25.5287	31.352	5.14	0.404297	0.675537	1.31848	2.57336	2.55261	5.47437	12.2179	26.171
7.94	2.35193	3.98627	9.98309	17.4898	25.674	31.4348	5.24	0.420654	0.695068	1.35754	2.66321	2.64246	5.65405	12.546	26.8507
8.04	2.37146	4.03394	10.0956	17.6547	25.8342	31.5168	5.34	0.435546	0.7146	1.40051	2.73669	2.70105	5.80957	12.8944	27.5421
8.14	2.40271	4.05658	10.2018	17.8023	25.9748	31.5754	5.44	0.439453	0.726318	1.43176	2.79211	2.76355	5.9939	13.2296	28.2406
8.24	2.42694	4.12219	10.3042	17.9703	26.1154	31.6544	5.54	0.442627	0.733398	1.47083	2.85779	2.82922	6.17749	13.5765	28.9281
8.34	2.45038	4.16754	10.3948	18.1273	26.2295	31.7247	5.64	0.450439	0.74585	1.50989	2.94836	2.91199	6.33374	13.9093	29.6007
8.44	2.46521	4.22375	10.4948	18.2859	26.3545	31.7903	5.74	0.471436	0.765381	1.54822	3.03821	3.00183	6.51343	14.2687	30.2804
8.54	2.49646	4.26752	10.5995	18.4312	26.4592	31.8676	5.84	0.490967	0.789551	1.58484	3.10535	3.09631	6.68994	14.6249	30.9764
8.64	2.51599	4.3183	10.7057	18.6031	26.5803	31.9387	5.94	0.493408	0.814697	1.63098	3.20544	3.16199	6.83301	14.9554	31.6781
8.74	2.55115	4.39642	10.8307	18.7789	26.717	32.0004	6.04	0.501221	0.831787	1.67004	3.28821	3.22449	6.9939	15.2804	32.382
8.84	2.59412	4.4472	10.9448	18.9586	26.8459	32.0833	6.14	0.513672	0.855225	1.70911	3.38977	3.2948	7.15405	15.6234	33.0616
8.94	2.60895	4.48938	11.0604	19.0992	26.9506	32.1606	6.24	0.501953	0.863037	1.73572	3.44519	3.39246	7.30249	15.9562	33.7491
9.04	2.64099	4.51361	11.1659	19.2593	27.0764	32.2286	6.34	0.515136	0.876221	1.745	3.50769	3.44788	7.47437	16.3007	34.421
9.14	2.66754	4.5722	11.28	19.4	27.1857	32.3059	6.44	0.517578	0.886475	1.79114	3.5929	3.53308	7.64233	16.6398	35.1007
9.24	2.68787	4.62299	11.3698	19.5601	27.2982	32.3958	6.54	0.525391	0.906006	1.81848	3.69446	3.60339	7.80249	16.9679	35.785
9.34	2.71912	4.67377	11.4839	19.7007	27.4287	32.4692	6.64	0.537109	0.925537	1.86145	3.77258	3.69788	7.95483	17.3077	36.4913
9.44	2.74725	4.72455	11.6003	19.8414	27.5764	32.5325	6.74	0.549561	0.945068	1.88879	3.84607	3.77063	8.11499	17.6639	37.1827
9.54	2.78162	4.77533	11.7214	19.982	27.717	32.6262	6.84	0.568359	0.9646	1.92004	3.92566	3.82214	8.27197	17.975	37.882
9.64	2.80975	4.823	11.8229	20.1273	27.835	32.7098	6.94	0.568359	0.991211	1.95129	4.00305	3.90417	8.4353	18.2882	38.557
9.74	2.82458	4.86908	11.9487	20.2632	27.9201	32.7786	7.04	0.583252	1.01538	1.99036	4.07654	3.9823	8.62671	18.6398	39.2264
9.84	2.85114	4.90344	12.0409	20.3796	28.0084	32.8442	7.14	0.595703	1.03491	2.01697	4.15149	4.06433	8.77051	18.9679	39.8702
9.94	2.87146	4.9433	12.1511	20.5015	28.1232	32.9106	7.24	0.607422	1.05444	2.03723	4.2218	4.13464	8.9353	19.3195	40.5492
10.04	2.89801	5.01831	12.2635	20.65	28.2326	32.9543	7.34	0.619873	1.06616	2.06531	4.31946	4.21741	9.10327	19.6476	41.1984
10.14	2.93005	5.0683	12.3862	20.7828	28.3342	33.0215	7.44	0.638672	1.09351	2.11145	4.42102	4.30969	9.25562	19.9796	41.882
10.24	2.95349	5.10266	12.4714	20.9117	28.4357	33.0746	7.54	0.638672	1.11304	2.15833	4.49915	4.36975	9.41577	20.3077	42.5389
10.34	2.97772	5.13629	12.5745	21.0375	28.5303	33.1231	7.64	0.661377	1.14429	2.20911	4.56482	4.4425	9.5791	20.6593	43.2023
10.44	3.01599	5.20111	12.6815	21.1656	28.6193	33.1778	7.74	0.677734	1.16064	2.24036	4.63977	4.49866	9.73218	20.9679	43.8429
10.54	3.03082	5.23547	12.8026	21.2703	28.7045	33.2223	7.84	0.697266	1.18726	2.29114	4.72644	4.58777	9.90405	21.2999	44.4906
10.64	3.05035	5.27924	12.8979	21.4156	28.7873	33.2708	7.94	0.701904	1.20679	2.34192	4.81165	4.66589	10.0759	21.6366	45.1241
10.74	3.07068	5.33783	13.0143	21.5328	28.8967	33.3176	8.04	0.720703	1.23804	2.3927	4.89368	4.73621	10.2329	21.964	45.7726
10.84	3.09882	5.37689	13.0847	21.6617	29.0139	33.3637	8.14	0.728516	1.25757	2.44666	4.9718	4.82605	10.3884	22.3116	46.3983
10.94	3.12146	5.43549	13.1854	21.7906	29.1037	33.4231	8.24	0.736328	1.28027	2.495	5.06165	4.90417	10.5837	22.6593	47.0421
11.04	3.14099	5.49799	13.2995	21.9117	29.1545	33.4825	8.34	0.748047	1.30444	2.54114	5.13977	4.99719	10.7393	22.9796	47.6906
11.14	3.17065	5.54407	13.4081	22.0328	29.2513	33.5239	8.44	0.751221	1.32397	2.58801	5.21716	5.06116	10.8923	23.3195	48.3116
11.24	3.19959	5.57611	13.4956	22.157	29.3264	33.5676	8.54	0.763672	1.34351	2.63879	5.2804	5.13464	11.0376	23.6593	48.9132
11.34	3.22382	5.63159	13.6167	22.2805	29.4092	33.6184	8.64	0.778564	1.36304	2.68103	5.37341	5.23938	11.208	23.9899	49.5485
11.44	3.25897	5.6925	13.7448	22.4156	29.506	33.6653	8.74	0.791016	1.38965	2.72864	5.453	5.33386	11.3728	24.3077	50.1639
11.54	3.2738	5.7558	13.8495	22.5445	29.5881	33.7083	8.84	0.795655	1.41382	2.7677	5.54993	5.44324	11.5361	24.6281	50.7609
11.64	3.30505	5.8183	13.9518	22.6734	29.6584	33.7442	8.94	0.819092	1.43799	2.82312	5.64441	5.53772	11.6938	24.9803	51.3749
11.74	3.3324	5.87299	14.0612	22.7945	29.7131	33.7981	9.04	0.833252	1.45996	2.86462	5.73206	5.63782	11.865	25.318	51.9742
11.84	3.35895	5.91907	14.1511	22.907	29.7904	33.8325	9.14	0.850342	1.48877	2.92468	5.8241	5.74402	12.0251	25.66	52.5546
11.94	3.37146	5.96283	14.2487	23.0211	29.8467	33.852	9.24	0.869141	1.5271	2.96619	5.92102	5.82214	12.1853	26.0038	53.1437
12.04	3.41052	6.03784	14.3425	23.1617	29.9474	33.8958	9.34	0.876954	1.54346	2.99817	5.97961	5.89246	12.3455	26.339	53.7101
12.14	3.42694	6.08783	14.4292	23.2945	30.0225	33.9239	9.44	0.884766	1.56616	3.04578	6.06628	5.9823	12.5181	26.6984	54.2687
12.24	3.45349	6.11517	14.5143	23.4117	30.0881	33.9583	9.54	0.896484	1.57788	3.0802	6.12732	6.06116	12.6807	27.0304	54.8429
12.34	3.47302	6.18549	14.6284	23.5406	30.1662	34.002	9.64	0.908203	1.60449	3.12317	6.19055	6.14636	12.8455	27.3656	55.3937
12.44	3.50427	6.23627	14.7167	23.6586	30.2435	34.0403	9.74	0.908203	1.62476	3.15759	6.26086	6.21667	12.9939	27.6866	55.921
12.54	3.52692	6.28235	14.8182	23.7538	30.3021	34.0817	9.84	0.91919	1.65137	3.19275	6.33435	6.30969	13.1643	28.0531	56.4164
12.64	3.55115	6.33392	14.9058	23.8609	30.3654	34.1067	9.94	0.935547	1.6709	3.23645	6.39758	6.37292	13.322	28.4171	56.8898
12.74	3.57068	6.37299	14.9948	23.9703	30.424	34.1575	10.04	0.947266	1.68335	3.27625	6.4679	6.43079	13.479	28.757	57.3702
12.84	3.60663	6.42065	15.0925	24.0844	30.5186	34.1848	10.14	0.959717	1.70435	3.31531	6.53967	6.53064	13.6392	29.0865	57.8553
12.94	3.63318	6.4433	15.2018	24.2007	30.5724	34.2208	10.24	0.978516	1.72632	3.36145	6.63196	6.60266	13.8064	29.4093	58.3429
13.04	3.65271	6.47925	15.2995	24.3023	30.6349	34.2551	10.34	0.986328	1.74121	3.40759	6.70227	6.67371	13.9697	29.7491	58.8116
13.14	3.68317	6.52844	15.4159	24.4031	30.6967	34.3012	10.44	1.00269	1.76538	3.45129	6.79919	6.78308	14.1228	30.0812	59.2609
13.24	3.716	6.58081	15.5151	24.4945	30.749	34.3419	10.54	1.01758	1.78174	3.50989	6.88196	6.86511	14.2798	30.4093	59.7023
13.34	3.73084	6.62219	15.6167	24.5797	30.7951	34.352	10.64	1.0293	1.80835	3.54578	6.96716	6.93542	14.4275	30.7296	60.132
13.44	3.76208	6.65424	15.7057	24.7007	30.8576	34.3958	10.74	1.04883	1.82788	3.5802	7.05774	7.01355	14.6072	31.0765	60.5734
13.54	3.78162	6.70502	15.8151	24.814	30.8967	34.4239	10.84	1.04419	1.83105	3.60217	7.12341	7.07922	14.7659	31.3734	61.0062
13.64	3.81287	6.74799	15.8932	24.9234	30.9553	34.4653	10.94	1.05664	1.85522	3.6239	7.20764	7.16199	14.936	31.703	61.4335
13.74	3.84412	6.78705	15.9948	25.0015	31.0013	34.4856	11.04	1.06836	1.88647	3.67004	7.31165	7.25183	15.115	32.0382	61.8312
13.84	3.86365	6.82611	16.0847	25.1031	31.0529	34.5255	11.14	1.07617	1.90601	3.69666	7.40857	7.34167	15.2634	32.3553	62.2023
13.94	3.8949	6.86206	16.1862	25.1929	31.0842	34.5598	11.24	1.08789	1.92236	3.72864	7.49597	7.40881	15.4431	32.6906	62.5765
14.04	3.92615	6.90814	16.2792	25.2945	31.1396	34.6106	11.34	1.0957	1.94434	3.76453	7.56165	7.49402	15.6118	33.0304	62.9288
14.14	3.94098	6.95422	16.369	25.3796	31.2076	34.6324	11.44	1.10742	1.95679	3.79114	7.64368	7.58386	15.7627	33.3507	63.2609
14.24	3.96521	6.99017	16.4206	25.482	31.2443	34.6458	11.54	1.11914	1.97632	3.8302	7.70935	7.64954	15.9236	33.6788	63.6007
14.34	4.00427	7.04877	16.5104	25.5718	31.3146	34.6856	11.64	1.12695	1.99268	3.87634	7.7804	7.73694	16.0837	34.0304	63.9257
14.44	4.0199	7.10736	16.6003	25.6812	31.381	34.7114	11.74	1.13477	2.00293	3.88879	7.85071	7.8175	16.2439	34.3344	64.2413
14.54	4.05585	7.16205	16.6948	25.7758	31.4365	34.7403	11.84	1.14648	2.01538	3.92468	7.92566	7.86902	16.4204	34.6281	64.5453
14.64	4.0824	7.22455	16.7847	25.8609	31.4943	34.7739	11.94	1.14648	2.03491	3.95911	7.99133	7.95959	16.5642	34.9679	64.8468
14.74	4.10895	7.26752	16.869	25.9382	31.5599	34.7895	12.04	1.16602	2.05444	3.98572	8.07654	8.03308	16.7314	35.2914	65.1398
14.84	4.12146	7.31128	16.9448	26.0258	31.5936	34.8153	12.14	1.17847	2.07861	4.00281	8.15222	8.11584	16.897	35.621	65.4413
14.94	4.16443	7.36908	17.0651	26.1148	31.6584	34.8489	12.24	1.19727	2.10522	4.04895	8.22961	8.21985	17.0791	35.9679	65.7413
15.04	4.18396	7.41986	17.1354	26.1929	31.7092	34.8754	12.34	1.20898	2.13184	4.09973	8.31946	8.2948	17.2517	36.2882	66.0304
15.14	4.23553	7.48627	17.2245	26.2828	31.7443	34.8958	12.44	1.2168	2.15283	4.12781	8.41785	8.36121	17.4236	36.6053	66.3116
15.24	4.2738	7.53705	17.2995	26.3531	31.7951	34.9317	12.54	1.2395	2.1709	4.17322	8.48206	8.44324	17.5916	36.9437	66.5648
15.34	4.30426	7.59094	17.4089	26.4031	31.849	34.9614	12.64	1.24414	2.19507	4.20447	8.55774	8.52136	17.783	37.2687	66.8273
15.44	4.34021	7.65424	17.4909	26.4898	31.8928	35.0004	12.74	1.26367	2.20996	4.24817	8.64758	8.59167	17.9431	37.5656	67.0773
15.54	4.35974	7.6933	17.5839	26.5679	31.9506	35.0247	12.84	1.29175	2.23877	4.32312	8.74597	8.70496	18.1392	37.9218	67.3241
15.64	4.37927	7.74408	17.6636	26.65	31.9709	35.052	12.94	1.31055	2.27393	4.36609	8.82336	8.78308	18.3018	38.264	67.5616
15.74	4.41522	7.81128	17.7651	26.7562	32.0264	35.1083	13.04	1.31836	2.28882	4.42395	8.90857	8.86975	18.4666	38.6007	67.7694
15.84	4.44879	7.84485	17.8495	26.8367	32.0795	35.1207	13.14	1.33789	2.29199	4.47473	8.98816	8.95032	18.6235	38.9288	68.0031
15.94	4.466	7.88159	17.937	26.9211	32.1084	35.1426	13.24	1.34106	2.31152	4.52014	9.07654	9.01672	18.7822	39.2491	68.225
16.04	4.50738	7.92767	18.0026	27.0132	32.1709	35.177	13.34	1.35742	2.34351	4.56384	9.1593	9.08069	18.9431	39.5577	68.4406
16.14	4.53162	7.97845	18.0847	27.0953	32.1974	35.2083	13.44	1.35742	2.35522	4.59265	9.22498	9.13	19.0837	39.8851	68.632
16.24	4.56287	8.01752	18.1745	27.1734	32.2365	35.2364	13.54	1.37695	2.37158	4.63416	9.28821	9.20496	19.2556	40.2147	68.8265
16.34	4.5824	8.0683	18.2839	27.2632	32.2873	35.259	13.64	1.38477	2.38965	4.6825	9.39758	9.30261	19.4189	40.546	69.0265
16.44	4.62146	8.11908	18.3347	27.3453	32.3264	35.2856	13.74	1.39258	2.4021	4.71692	9.48425	9.3761	19.572	40.8734	69.2179
16.54	4.64099	8.16986	18.4175	27.4156	32.3654	35.2981	13.84	1.40894	2.43335	4.7677	9.54285	9.45569	19.7368	41.1991	69.4186
16.64	4.67224	8.21674	18.4948	27.4859	32.431	35.3176	13.94	1.42773	2.44971	4.81848	9.62024	9.54089	19.9041	41.5428	69.6007
16.74	4.69177	8.2597	18.5878	27.5445	32.4865	35.3442	14.04	1.43555	2.4646	4.86609	9.70544	9.61584	20.0642	41.8585	69.7758
16.84	4.7113	8.3089	18.6776	27.621	32.5287	35.3567	14.14	1.44727	2.48413	4.90051	9.78821	9.67371	20.2322	42.1742	69.9406
16.94	4.75348	8.34564	18.7604	27.7007	32.5693	35.3762	14.24	1.45508	2.49902	4.94666	9.85852	9.74719	20.4087	42.4757	70.1007
17.04	4.77771	8.3847	18.8503	27.7593	32.599	35.4028	14.34	1.4668	2.51147	4.96228	9.92883	9.82214	20.5642	42.796	70.2491
17.14	4.80585	8.44019	18.9401	27.8375	32.6475	35.4231	14.44	1.47461	2.53955	5.0177	10.0109	9.9198	20.7314	43.1281	70.3866
17.24	4.84021	8.49408	19.0347	27.9242	32.6935	35.4395	14.54	1.48633	2.55444	5.04187	10.1053	10.0182	20.8845	43.4125	70.5226
17.34	4.87927	8.55658	19.1315	27.982	32.7248	35.4856	14.64	1.49805	2.59741	5.08728	10.214	10.1346	21.0447	43.7374	70.6945
17.44	4.8996	8.60425	19.2018	28.0492	32.7412	35.4973	14.74	1.51758	2.6123	5.11926	10.2843	10.2003	21.2048	44.046	70.8304
17.54	4.92535	8.65344	19.3065	28.1062	32.7857	35.52	14.84	1.51758	2.62476	5.16687	10.35	10.2635	21.3533	44.3585	70.9523
17.64	4.95819	8.71362	19.3979	28.1586	32.8115	35.5497	14.94	1.53711	2.65283	5.20129	10.421	10.3339	21.501	44.6671	71.0812
17.74	4.97614	8.7511	19.4909	28.2273	32.8342	35.5512	15.04	1.53711	2.6748	5.24036	10.5226	10.4237	21.6619	44.953	71.2172
17.84	4.99255	8.80347	19.5776	28.2875	32.8701	35.5793	15.14	1.55981	2.69043	5.28967	10.5844	10.4972	21.8057	45.2523	71.3422
17.94	5.0199	8.85736	19.6628	28.3562	32.9045	35.595	15.24	1.56445	2.72241	5.32629	10.6742	10.5768	21.9595	45.5577	71.4647
18.04	5.04254	8.89954	19.7393	28.4226	32.9388	35.6129	15.34	1.56445	2.72705	5.36218	10.7257	10.6573	22.1033	45.8422	71.5773
18.14	5.07068	8.93549	19.7995	28.4976	32.9506	35.634	15.44	1.58154	2.75366	5.39343	10.8319	10.7252	22.2563	46.1373	71.7225
18.24	5.09802	8.99408	19.8972	28.5562	32.9826	35.6583	15.54	1.59106	2.77319	5.45911	10.9171	10.7863	22.4236	46.4679	71.8344
18.34	5.12537	9.03314	19.9557	28.5992	33.0021	35.6848	15.64	1.60034	2.80444	5.49353	10.996	10.8495	22.572	46.7765	71.9569
18.44	5.15662	9.07611	20.0182	28.6656	33.0295	35.7043	15.74	1.61133	2.81152	5.52161	11.0421	10.9088	22.7048	47.0616	72.0538
18.54	5.18475	9.11517	20.1011	28.7359	33.0576	35.7192	15.84	1.62231	2.82861	5.56531	11.1398	11.0018	22.8845	47.3539	72.1742
18.64	5.216	9.17065	20.1948	28.8109	33.092	35.7333	15.94	1.63159	2.84351	5.60681	11.2367	11.0675	23.0479	47.6554	72.2804
18.74	5.26208	9.22845	20.2722	28.8804	33.1349	35.7668	16.04	1.63867	2.85059	5.62708	11.3273	11.1425	23.2205	47.9679	72.3749
18.84	5.29333	9.27924	20.3425	28.9312	33.1545	35.7817	16.14	1.64648	2.87158	5.66541	11.4171	11.1979	23.3806	48.2765	72.4476
18.94	5.30817	9.33783	20.4128	28.9945	33.1857	35.7942	16.24	1.64648	2.88647	5.69739	11.5038	11.2714	23.5376	48.5741	72.5382
19.04	5.3277	9.37219	20.4784	29.0234	33.2006	35.8098	16.34	1.66138	2.90918	5.73328	11.5695	11.3534	23.7048	48.8734	72.6281
19.14	5.34021	9.41595	20.5495	29.0726	33.2248	35.8176	16.44	1.67383	2.9248	5.76306	11.6742	11.4222	23.8635	49.1781	72.7086
19.24	5.36444	9.47144	20.6472	29.1226	33.2568	35.8372	16.54	1.68555	2.96069	5.80212	11.7328	11.4979	24.0291	49.4952	72.7843
19.34	5.41131	9.52924	20.7331	29.1734	33.3068	35.8762	16.64	1.68555	2.98877	5.83411	11.8156	11.5682	24.2009	49.7531	72.8859
19.44	5.42535	9.55658	20.78	29.2203	33.3264	35.8958	16.74	1.69653	3.00366	5.87	11.8859	11.6385	24.3689	50.0343	72.964
19.54	5.45038	9.61908	20.862	29.2828	33.3576	35.9239	16.84	1.70972	3.03027	5.90833	11.9725	11.7206	24.5259	50.3202	73.0311
19.64	5.48474	9.66125	20.9206	29.3218	33.3849	35.934	16.94	1.70972	3.04419	5.94739	12.0428	11.7806	24.686	50.6014	73.0936
19.74	5.51208	9.72455	20.9956	29.3922	33.424	35.9543	17.04	1.7207	3.06152	5.97864	12.1124	11.8651	24.8408	50.8898	73.171
19.84	5.53162	9.77533	21.0612	29.4312	33.4553	35.9809	17.14	1.72852	3.08569	6.00989	12.1781	11.9386	24.9939	51.171	73.2413
19.94	5.55817	9.84564	21.1432	29.4945	33.46	35.9934	17.24	1.74487	3.10522	6.06531	12.246	12.026	25.136	51.4452	73.3312
20.04	5.57538	9.90894	21.187	29.557	33.4912	36.0145	17.34	1.75977	3.12476	6.10828	12.3312	12.1151	25.2869	51.7289	73.4015
20.14	5.60193	9.96674	21.2526	29.6148	33.5209	36.0403	17.44	1.76611	3.14429	6.13342	12.4132	12.2081	25.4619	51.9945	73.4913
20.24	5.62146	10.0058	21.3229	29.6656	33.5451	36.052	17.54	1.77222	3.17554	6.16687	12.4913	12.2909	25.6267	52.2523	73.5616
20.34	5.64179	10.0488	21.3659	29.7047	33.5685	36.0403	17.64	1.7793	3.19043	6.20837	12.5687	12.358	25.7869	52.507	73.6202
20.44	5.65192	10.0878	21.4198	29.7625	33.5834	36.0668	17.74	1.76758	3.18799	6.22864	12.6202	12.4432	25.9307	52.7843	73.6788
20.54	5.68866	10.1355	21.4878	29.807	33.6006	36.0676	17.84	1.79028	3.21851	6.27478	12.7054	12.5331	26.1033	53.0773	73.7609
20.64	5.72693	10.1769	21.5456	29.8765	33.6389	36.088	17.94	1.80347	3.2334	6.30359	12.7687	12.6105	26.2705	53.3468	73.8312
20.74	5.74176	10.2089	21.6276	29.9273	33.6584	36.1106	18.04	1.802	3.24585	6.34192	12.8553	12.6815	26.4431	53.6085	73.9015
20.84	5.76599	10.2597	21.6862	29.9742	33.6779	36.1176	18.14	1.81445	3.26221	6.38098	12.921	12.7518	26.6111	53.8632	73.9554
20.94	5.78552	10.3105	21.7643	30.0172	33.6974	36.1184	18.24	1.82617	3.2771	6.40369	12.9913	12.8292	26.7603	54.1202	74.0187
21.04	5.81519	10.3769	21.83	30.0671	33.7318	36.1379	18.34	1.84253	3.29199	6.4364	13.0765	12.8893	26.9353	54.3702	74.0812
21.14	5.82617	10.4199	21.9097	30.1148	33.7646	36.1418	18.44	1.82617	3.29272	6.45911	13.1249	12.9269	27.0869	54.6281	74.1281
21.24	5.8324	10.4402	21.944	30.1617	33.7678	36.1379	18.54	1.8457	3.2998	6.50989	13.1906	12.9706	27.2322	54.8812	74.1788
21.34	5.85583	10.4902	22.0143	30.1929	33.7873	36.1528	18.64	1.85742	3.30908	6.54895	13.2609	13.0573	27.397	55.1359	74.2538
21.44	5.87537	10.5292	22.0729	30.2515	33.8068	36.1622	18.74	1.85742	3.33105	6.56848	13.3265	13.1112	27.5447	55.3859	74.3195
21.54	5.8949	10.5636	22.1354	30.3023	33.8264	36.1692	18.84	1.86523	3.34351	6.60291	13.4171	13.1815	27.7048	55.6405	74.3898
21.64	5.92615	10.5878	22.2104	30.3414	33.8576	36.1887	18.94	1.87695	3.35986	6.63879	13.4874	13.2472	27.8486	55.8781	74.4554
21.74	5.94098	10.6386	22.2909	30.3773	33.8654	36.2036	19.04	1.87695	3.3584	6.67786	13.5773	13.33	27.99	56.1163	74.507
21.84	5.95349	10.6777	22.3472	30.4382	33.8849	36.2083	19.14	1.88867	3.36694	6.70911	13.6366	13.401	28.1228	56.339	74.5499
21.94	5.98083	10.7316	22.4276	30.4734	33.9076	36.2161	19.24	1.90503	3.39111	6.76135	13.7023	13.4791	28.2876	56.5858	74.6249
22.04	6.00897	10.7722	22.487	30.5179	33.9326	36.2325	19.34	1.91992	3.41772	6.81458	13.7843	13.5519	28.447	56.8234	74.6827
22.14	6.03552	10.8261	22.5222	30.5523	33.9553	36.2465	19.44	1.9082	3.43018	6.81775	13.8507	13.6151	28.5688	57.0616	74.7413
22.24	6.05505	10.8769	22.5651	30.5914	33.9748	36.2473	19.54	1.91992	3.43726	6.86145	13.9327	13.6932	28.7244	57.2999	74.7999
22.34	6.09412	10.9277	22.6432	30.6226	33.9982	36.2668	19.64	1.92627	3.45532	6.90369	14.0226	13.7831	28.8948	57.5289	74.8507
22.44	6.12537	10.9589	22.694	30.6617	34.006	36.2833	19.74	1.93555	3.47241	6.94739	14.1007	13.8417	29.0408	57.757	74.8898
22.54	6.15192	11.0058	22.7526	30.7125	34.0256	36.2856	19.84	1.92773	3.48096	6.97083	14.1827	13.9191	29.1821	57.9679	74.9249
22.64	6.16443	11.0613	22.8151	30.7515	34.0373	36.2981	19.94	1.93555	3.49121	7.02478	14.2531	13.9823	29.3259	58.1835	74.9594
22.74	6.19177	11.1074	22.8659	30.7906	34.0568	36.3176	20.04	1.94727	3.50757	7.05676	14.3383	14.0597	29.4861	58.4093	74.9913
22.84	6.22302	11.1581	22.9323	30.8336	34.0764	36.3246	20.14	1.94727	3.51538	7.09265	14.3898	14.0963	29.6299	58.6202	75.0187
22.94	6.25897	11.2089	22.9831	30.8804	34.0959	36.3254	20.24	1.95972	3.53491	7.14343	14.4679	14.1783	29.7759	58.8585	75.0577
23.04	6.2738	11.2706	23.0222	30.9203	34.1076	36.3536	20.34	1.9668	3.55444	7.18494	14.5695	14.244	29.9353	59.0695	75.1085
23.14	6.28864	11.3261	23.0847	30.9429	34.1154	36.3606	20.44	1.97852	3.58252	7.22546	14.6483	14.326	30.0908	59.2882	75.1515
23.24	6.31287	11.3769	23.155	30.9937	34.1349	36.3754	20.54	1.98633	3.58569	7.25989	14.7218	14.3995	30.2439	59.4991	75.2069
23.34	6.3324	11.416	23.2253	31.0445	34.1467	36.3848	20.64	1.98633	3.59351	7.29895	14.7882	14.4479	30.3774	59.6866	75.2296
23.44	6.34021	11.4597	23.2722	31.0718	34.1545	36.3762	20.74	1.99268	3.61621	7.34827	14.8688	14.5167	30.5166	59.8961	75.2836
23.54	6.37146	11.5175	23.3229	31.1226	34.174	36.3911	20.84	1.99414	3.63647	7.36926	14.9366	14.6034	30.6619	60.0851	75.3507
23.64	6.39099	11.5519	23.3932	31.1617	34.1935	36.3958	20.94	2.00659	3.65601	7.40125	15.0201	14.6932	30.822	60.2889	75.4139
23.74	6.42224	11.6003	23.4518	31.2125	34.2053	36.4122	21.04	2.0332	3.69116	7.44421	15.1202	14.7909	30.9822	60.5116	75.4796
23.84	6.45038	11.6464	23.5104	31.2515	34.2248	36.4192	21.14	2.02222	3.69971	7.48254	15.1781	14.8612	31.1001	60.6984	75.5109
23.94	6.47302	11.6972	23.5807	31.2906	34.2365	36.434	21.24	2.0293	3.70679	7.50989	15.2491	14.9628	31.2556	60.8929	75.5734
24.04	6.49097	11.7511	23.6417	31.3562	34.2474	36.4496	21.34	2.03711	3.73804	7.54114	15.3195	15.0214	31.4041	61.0773	75.632
24.14	6.5199	11.8027	23.7097	31.4	34.2834	36.4708	21.44	2.05347	3.75757	7.58484	15.3834	15.1127	31.5688	61.278	75.6874
24.24	6.55585	11.8425	23.7769	31.4359	34.2881	36.4747	21.54	2.06372	3.7771	7.61853	15.4594	15.2167	31.7119	61.4718	75.7335
24.34	6.58081	11.88	23.8339	31.4773	34.2982	36.4879	21.64	2.06763	3.80762	7.6615	15.5336	15.3246	31.8682	61.6625	75.7953
24.44	6.59802	11.9238	23.8893	31.5211	34.3224	36.5051	21.74	2.08398	3.83179	7.69739	15.6281	15.4003	32.0408	61.8539	75.8507
24.54	6.62927	11.9745	23.9479	31.5601	34.3342	36.5082	21.84	2.0918	3.84814	7.72864	15.6984	15.4855	32.1899	62.0343	75.8976
24.64	6.6535	12.0253	24.03	31.5914	34.342	36.5215	21.94	2.10815	3.86768	7.76062	15.7687	15.5533	32.3384	62.2186	75.9452
24.74	6.68005	12.0644	24.0768	31.6304	34.3615	36.5247	22.04	2.12695	3.89355	7.79578	15.8468	15.6276	32.4893	62.4054	75.9913
24.84	6.69489	12.1035	24.1472	31.6617	34.3732	36.5395	22.14	2.14258	3.91699	7.82556	15.9203	15.7081	32.6455	62.5773	76.0406
24.94	6.71912	12.1589	24.2097	31.7007	34.381	36.5411	22.24	2.1582	3.94189	7.85681	15.996	15.7784	32.8142	62.7328	76.0499
25.04	6.75037	12.205	24.2682	31.7398	34.3928	36.5512	22.34	2.17383	3.9646	7.89661	16.0773	15.869	32.9705	62.9171	76.0968
25.14	6.77771	12.248	24.3268	31.7711	34.4123	36.552	22.44	2.1731	3.97632	7.92004	16.1593	15.9479	33.1182	63.0858	76.1281
25.24	6.80896	12.298	24.3893	31.8054	34.424	36.5637	22.54	2.18164	3.99902	7.94275	16.2445	16.0331	33.2791	63.2523	76.1757
25.34	6.84021	12.3574	24.4597	31.8297	34.4435	36.595	22.64	2.198	4.02783	7.97937	16.317	16.0963	33.4407	63.4218	76.203
25.44	6.86835	12.4042	24.5104	31.8656	34.4631	36.6145	22.74	2.21289	4.04663	8.0177	16.4093	16.1573	33.6228	63.5922	76.2491
25.54	6.88318	12.4472	24.5612	31.9117	34.4748	36.6231	22.84	2.22461	4.06152	8.05676	16.475	16.2323	33.79	63.7452	76.2804
25.64	6.91132	12.4832	24.5972	31.9398	34.4795	36.6184	22.94	2.24805	4.08252	8.08484	16.5812	16.3143	33.9517	63.9257	76.3265
25.74	6.92926	12.5175	24.6315	31.9625	34.4865	36.6262	23.04	2.25586	4.10522	8.12244	16.6788	16.3893	34.1072	64.089	76.3624
25.84	6.94177	12.5683	24.6706	32.0054	34.506	36.6497	23.14	2.25586	4.13184	8.17322	16.7523	16.4535	34.2588	64.2523	76.3929
25.94	6.97302	12.6074	24.7183	32.0445	34.5178	36.6661	23.24	2.27856	4.15137	8.21375	16.8436	16.5214	34.4072	64.4171	76.4406
26.04	6.98785	12.6339	24.7596	32.071	34.5131	36.6598	23.34	2.2832	4.16382	8.24817	16.8969	16.5917	34.572	64.5656	76.4874
26.14	7.02069	12.6777	24.8034	32.1031	34.5256	36.6692	23.44	2.2832	4.16846	8.28723	16.9679	16.6588	34.7173	64.6937	76.5187
26.24	7.03552	12.7089	24.8464	32.1343	34.5373	36.684	23.54	2.30347	4.20679	8.34192	17.0616	16.7362	34.8799	64.8468	76.5812
26.34	7.06287	12.7675	24.8932	32.1734	34.5646	36.7012	23.64	2.31128	4.2146	8.3739	17.1327	16.8026	35.0259	64.9576	76.6132
26.44	7.09412	12.8066	24.944	32.1929	34.5811	36.7083	23.74	2.33789	4.24585	8.43884	17.2303	16.8964	35.2048	65.1202	76.6632
26.54	7.11365	12.8456	24.9862	32.2203	34.5881	36.7231	23.84	2.35278	4.26074	8.474	17.2992	16.9777	35.365	65.2516	76.6906
26.64	7.1449	12.8964	25.0417	32.2515	34.5959	36.7208	23.94	2.35742	4.28174	8.51453	17.3695	17.0675	35.5056	65.3859	76.7335
26.74	7.17224	12.9355	25.0886	32.2828	34.6154	36.7278	24.04	2.36914	4.29663	8.54895	17.421	17.1307	35.6611	65.5155	76.7726
26.84	7.19177	12.9863	25.1393	32.3101	34.6224	36.7426	24.14	2.38159	4.3208	8.58484	17.496	17.2142	35.7993	65.6444	76.8116
26.94	7.23474	13.037	25.2018	32.3531	34.6467	36.759	24.24	2.40039	4.35449	8.63098	17.5687	17.2948	35.9697	65.7758	76.8429
27.04	7.24957	13.0925	25.2456	32.3843	34.6662	36.7637	24.34	2.41602	4.36304	8.68176	17.6444	17.3925	36.1196	65.8976	76.8781
27.14	7.26208	13.1386	25.3034	32.4156	34.6779	36.7739	24.44	2.42456	4.3833	8.71765	17.7335	17.455	36.2603	66.0233	76.9257
27.24	7.30115	13.173	25.362	32.4312	34.6935	36.7817	24.54	2.44263	4.41309	8.76697	17.8148	17.5167	36.426	66.1664	76.9672
27.34	7.31598	13.2167	25.4081	32.4578	34.6959	36.7864	24.64	2.45898	4.43262	8.82239	17.8866	17.6002	36.5642	66.2968	76.9999
27.44	7.34723	13.2675	25.4401	32.4898	34.7131	36.7942	24.74	2.45898	4.44189	8.86853	17.9523	17.6464	36.7322	66.4359	77.0258
27.54	7.36755	13.3019	25.4831	32.5085	34.7209	36.8129	24.84	2.47388	4.4646	8.90833	18.0453	17.7323	36.8892	66.5577	77.0812
27.64	7.38788	13.3339	25.53	32.5289	34.7412	36.8106	24.94	2.48315	4.48096	8.94421	18.1171	17.7948	37.0298	66.6757	77.1053
27.74	7.43005	13.3925	25.5807	32.5562	34.7639	36.8333	25.04	2.50122	4.5061	8.99353	18.2218	17.8768	37.1956	66.7953	77.1437
27.84	7.44647	13.4449	25.6245	32.5844	34.7686	36.8419	25.14	2.50586	4.5083	9.02625	18.3116	17.9354	37.322	66.9171	77.171
27.94	7.4613	13.4863	25.6706	32.6039	34.7756	36.8567	25.24	2.50586	4.5271	9.04431	18.3851	17.994	37.4939	67.0265	77.2023
28.04	7.48785	13.5253	25.7214	32.6304	34.7951	36.8637	25.34	2.53003	4.55127	9.09265	18.4647	18.0643	37.6587	67.1639	77.246
28.14	7.50348	13.5909	25.7635	32.6531	34.8177	36.8676	25.44	2.55347	4.5896	9.1427	18.5585	18.1659	37.8259	67.3116	77.2914
28.24	7.52771	13.6378	25.819	32.689	34.8342	36.884	25.54	2.56055	4.60449	9.17004	18.6241	18.244	37.9861	67.4406	77.3116
28.34	7.57068	13.705	25.862	32.7125	34.8537	36.9005	25.64	2.57544	4.62866	9.20129	18.714	18.326	38.1431	67.5499	77.3429
28.44	7.5871	13.7558	25.9011	32.732	34.8685	36.9075	25.74	2.59961	4.64502	9.2489	18.7914	18.3932	38.2791	67.6547	77.3624
28.54	7.61444	13.8074	25.9565	32.7562	34.8779	36.927	25.84	2.60742	4.65527	9.27551	18.8741	18.4816	38.415	67.7374	77.389
28.64	7.64801	13.8605	25.9979	32.7664	34.8802	36.9301	25.94	2.62231	4.67871	9.33728	18.9554	18.548	38.5596	67.8304	77.4242
28.74	7.67224	13.9089	26.03	32.7906	34.8779	36.9348	26.04	2.64331	4.70679	9.38098	19.0375	18.6346	38.7126	67.9335	77.4601
28.84	7.69958	13.9667	26.0737	32.8101	34.8928	36.9434	26.14	2.64966	4.73096	9.43176	19.0975	18.6808	38.8533	68.0382	77.4913
28.94	7.73785	14.0175	26.1237	32.8414	34.9162	36.9583	26.24	2.66284	4.73804	9.45837	19.171	18.7518	38.9939	68.1398	77.5155
29.04	7.76208	14.0878	26.1628	32.8609	34.9357	36.9653	26.34	2.67773	4.76074	9.5177	19.2609	18.8268	39.1501	68.2374	77.5499
29.14	7.78943	14.1464	26.2167	32.8922	34.9435	36.9739	26.44	2.68555	4.77002	9.54578	19.3475	18.8893	39.2876	68.3077	77.5663
29.24	7.82068	14.1855	26.2604	32.9117	34.9631	36.9856	26.54	2.7168	4.79199	9.59192	19.4249	18.955	39.4517	68.3976	77.6124
29.34	7.85974	14.2363	26.3112	32.9429	34.9865	37.0168	26.64	2.7168	4.80444	9.63806	19.5031	19.0253	39.583	68.496	77.639
29.44	7.89099	14.287	26.3425	32.9625	35.0013	37.02	26.74	2.72852	4.8208	9.67004	19.5734	19.0909	39.7134	68.5812	77.66
29.54	7.92224	14.3378	26.3932	32.9742	35.006	37.0247	26.84	2.74414	4.84741	9.71375	19.6469	19.1705	39.8455	68.6788	77.6906
29.64	7.93866	14.3769	26.4206	32.9937	35.0139	37.0364	26.94	2.75586	4.87476	9.74817	19.7179	19.244	39.9814	68.7882	77.7172
29.74	7.9613	14.416	26.4636	33.0132	35.0334	37.0411	27.04	2.77222	4.88965	9.79895	19.785	19.3292	40.1228	68.8781	77.7491
29.84	7.99255	14.4589	26.5026	33.0211	35.0451	37.0364	27.14	2.7793	4.89893	9.84509	19.8624	19.3807	40.2751	68.9796	77.7804
29.94	8.0191	14.498	26.537	33.0437	35.0529	37.0512	27.24	2.78711	4.92554	9.87708	19.921	19.4628	40.4236	69.0499	77.7968
30.04	8.04333	14.537	26.5807	33.0765	35.0724	37.0559	27.34	2.79102	4.93262	9.91223	19.9672	19.5448	40.5681	69.1273	77.8187
30.14	8.07068	14.5683	26.6198	33.0945	35.0842	37.0637	27.44	2.802	4.94824	9.95911	20.0336	19.6151	40.6838	69.2015	77.8344
30.24	8.10974	14.6269	26.6589	33.1265	35.1037	37.0833	27.54	2.81836	4.98096	10.0021	20.1007	19.705	40.822	69.2882	77.8702
30.34	8.12616	14.666	26.6948	33.1351	35.1053	37.0919	27.64	2.82617	4.99585	10.0294	20.1984	19.7753	40.9626	69.3632	77.9015
30.44	8.17535	14.7363	26.744	33.1617	35.1302	37.1067	27.74	2.83325	5.00293	10.0802	20.2655	19.8651	41.1001	69.4288	77.9242
30.54	8.18475	14.78	26.7816	33.1742	35.1349	37.1067	27.84	2.8457	5.01538	10.1146	20.3507	19.9432	41.2439	69.4991	77.9452
30.64	8.2113	14.8214	26.826	33.2007	35.1545	37.1145	27.94	2.8457	5.02319	10.1271	20.4093	19.994	41.3845	69.5531	77.9601
30.74	8.24567	14.8722	26.8651	33.2156	35.1576	37.1098	28.04	2.85352	5.05444	10.1661	20.5062	20.0643	41.533	69.6163	77.9796
30.84	8.25818	14.912	26.8972	33.232	35.1623	37.1145	28.14	2.8606	5.0708	10.1857	20.5773	20.13	41.6736	69.6945	78.0187
30.94	8.28943	14.955	26.9479	33.2398	35.1818	37.134	28.24	2.86133	5.08569	10.2365	20.6476	20.201	41.7979	69.7765	78.0499
31.04	8.32227	14.9988	26.9839	33.2758	35.2061	37.1434	28.34	2.87769	5.11694	10.2692	20.7421	20.276	41.9243	69.871	78.0819
31.14	8.34412	15.0449	27.03	33.2906	35.2201	37.1575	28.44	2.8894	5.13647	10.3107	20.839	20.3566	42.0837	69.9288	78.1273
31.24	8.36676	15.0956	27.069	33.3101	35.2131	37.1645	28.54	2.89966	5.15137	10.3497	20.921	20.4315	42.2439	69.9874	78.1476
31.34	8.38318	15.1464	27.1198	33.3414	35.2326	37.1653	28.64	2.92456	5.17554	10.3927	21.0179	20.5104	42.4041	70.0648	78.1874
31.44	8.39801	15.1808	27.1464	33.3562	35.2396	37.1723	28.74	2.91602	5.18335	10.4154	21.0695	20.5643	42.533	70.1046	78.1906
31.54	8.41052	15.2324	27.1948	33.3687	35.2404	37.1731	28.84	2.93555	5.19971	10.4591	21.1476	20.6229	42.6814	70.1639	78.2218
31.64	8.43787	15.2831	27.2409	33.3882	35.2521	37.1817	28.94	2.93872	5.21777	10.4889	21.2296	20.6847	42.8494	70.2211	78.2445
31.74	8.46912	15.3339	27.28	33.4148	35.2568	37.177	29.04	2.95508	5.23413	10.5333	21.2999	20.7667	43.033	70.2843	78.2758
31.84	8.48865	15.373	27.319	33.4273	35.2639	37.1965	29.14	2.96997	5.25366	10.5731	21.3585	20.8182	43.1768	70.3468	78.296
31.94	8.5246	15.4089	27.3628	33.4515	35.2764	37.2043	29.24	2.96289	5.26855	10.5958	21.432	20.8658	43.322	70.4008	78.3273
32.04	8.53864	15.4472	27.3932	33.4742	35.2873	37.2083	29.34	2.97925	5.28564	10.6434	21.4921	20.9244	43.4602	70.4608	78.3514
32.14	8.55115	15.498	27.444	33.4937	35.2873	37.22	29.44	2.99097	5.30908	10.6896	21.589	21.0214	43.615	70.5116	78.3898
32.24	8.5824	15.5535	27.4831	33.5211	35.2951	37.2231	29.54	2.99805	5.32397	10.724	21.6476	21.0917	43.7634	70.5773	78.4178
32.34	8.60193	15.5948	27.5222	33.5406	35.3068	37.2356	29.64	2.99805	5.33496	10.7404	21.7218	21.1659	43.8767	70.6398	78.4327
32.44	8.61835	15.6433	27.5604	33.5687	35.3185	37.2473	29.74	3.00977	5.35522	10.788	21.7921	21.2316	44.0369	70.7101	78.4523
32.54	8.6449	15.7089	27.5925	33.5836	35.3264	37.2551	29.84	3.0105	5.36768	10.8036	21.8553	21.3073	44.1899	70.7733	78.4718
32.64	8.67224	15.7597	27.6315	33.6031	35.3459	37.2637	29.94	3.0293	5.39502	10.8615	21.921	21.3846	44.3213	70.8312	78.5031
32.74	8.69568	15.8105	27.6706	33.6226	35.3529	37.2786	30.04	3.03711	5.39819	10.9005	21.996	21.4823	44.4353	70.8969	78.5226
32.84	8.72302	15.8574	27.7018	33.6461	35.3537	37.2903	30.14	3.04883	5.42944	10.9388	22.0687	21.5526	44.5447	70.9601	78.5499
32.94	8.75037	15.916	27.7456	33.6687	35.381	37.3012	30.24	3.05908	5.44751	10.974	22.1547	21.6229	44.6885	71.0219	78.5765
33.04	8.77692	15.9667	27.7722	33.689	35.3928	37.3059	30.34	3.06445	5.4646	11.0177	22.2264	21.7128	44.8142	71.0851	78.6053
33.14	8.79413	16.0058	27.8034	33.7125	35.4123	37.3223	30.44	3.06445	5.47949	11.0568	22.3148	21.8026	44.9399	71.1359	78.6124
33.24	8.8277	16.0488	27.8229	33.7398	35.424	37.3207	30.54	3.08789	5.50366	11.1193	22.4015	21.8846	45.0713	71.1952	78.6508
33.34	8.84882	16.0925	27.8425	33.7484	35.4287	37.334	30.64	3.08081	5.5083	11.1434	22.4764	21.9581	45.2095	71.2296	78.6593
33.44	8.88318	16.1425	27.8854	33.775	35.4474	37.3489	30.74	3.09253	5.53955	11.1818	22.5616	22.0573	45.3423	71.2968	78.6906
33.54	8.90271	16.1894	27.905	33.7945	35.4553	37.3575	30.84	3.1145	5.56543	11.213	22.6437	22.1542	45.4783	71.3578	78.7069
33.64	8.93085	16.2324	27.944	33.814	35.467	37.3606	30.94	3.11914	5.58105	11.2435	22.7321	22.2362	45.5979	71.4047	78.7289
33.74	8.9566	16.2823	27.9862	33.8445	35.4896	37.3785	31.04	3.13867	5.60205	11.3075	22.7968	22.3214	45.7244	71.4647	78.7484
33.84	8.98944	16.323	28.012	33.8773	35.499	37.3926	31.14	3.13159	5.62158	11.3348	22.8553	22.3658	45.8579	71.5116	78.7616
33.94	9.0191	16.3722	28.0487	33.8953	35.4974	37.3942	31.24	3.14185	5.65137	11.3763	22.9476	22.434	45.9963	71.557	78.7758
34.04	9.05115	16.4277	28.0729	33.9195	35.5107	37.4036	31.34	3.14648	5.65137	11.4005	22.9945	22.4784	46.0962	71.5961	78.785
34.14	9.07068	16.4745	28.112	33.9476	35.517	37.4122	31.44	3.1582	5.66846	11.4513	23.0709	22.5651	46.2173	71.6522	78.8163
34.24	9.10193	16.5058	28.1511	33.9656	35.5303	37.427	31.54	3.16602	5.69507	11.4904	23.1437	22.662	46.3845	71.7179	78.8429
34.34	9.13318	16.5449	28.1823	33.9898	35.5334	37.4301	31.64	3.16602	5.7146	11.5216	23.2094	22.7369	46.5447	71.7758	78.8741
34.44	9.15271	16.5878	28.2018	34.0093	35.5451	37.4231	31.74	3.17065	5.73096	11.5372	23.2491	22.7831	46.6541	71.8156	78.8898
34.54	9.18707	16.6222	28.2331	34.0179	35.5529	37.4317	31.84	3.17627	5.74902	11.5951	23.339	22.8636	46.7932	71.8812	78.9242
34.64	9.19647	16.6511	28.2573	34.0179	35.5615	37.4434	31.94	3.18555	5.78491	11.6224	23.4047	22.9315	46.9197	71.9413	78.9437
34.74	9.22302	16.6972	28.2909	34.0328	35.5685	37.4457	32.04	3.18555	5.81152	11.6661	23.4679	22.9901	47.0798	71.9874	78.9601
34.84	9.24567	16.7316	28.3143	34.0593	35.5795	37.4496	32.14	3.20508	5.82861	11.7067	23.5741	23.0619	47.2219	72.0428	78.9921
34.94	9.2785	16.7722	28.3589	34.064	35.5928	37.4512	32.24	3.2019	5.85522	11.7404	23.6561	23.1542	47.3455	72.0961	79.0187
35.04	9.29333	16.8066	28.3815	34.0765	35.5959	37.463	32.34	3.20898	5.88647	11.7794	23.7094	23.2245	47.4744	72.1359	79.0499
35.14	9.32928	16.8456	28.4245	34.0984	35.5959	37.4536	32.44	3.21216	5.90601	11.8107	23.7758	23.3097	47.6221	72.1835	79.0695
35.24	9.34412	16.8886	28.4518	34.1031	35.6076	37.4583	32.54	3.22144	5.93018	11.8451	23.8273	23.3729	47.7439	72.2296	79.089
35.34	9.35895	16.9441	28.4909	34.1226	35.6154	37.4661	32.64	3.22852	5.94897	11.8771	23.8944	23.4315	47.8533	72.2609	79.1053
35.44	9.38318	16.9902	28.5339	34.1343	35.6224	37.4747	32.74	3.23633	5.96851	11.9279	23.9523	23.5018	47.9626	72.3031	79.1273
35.54	9.41443	17.0292	28.5612	34.1422	35.6201	37.4731	32.84	3.2644	6.00439	11.9801	24.0421	23.5885	48.1047	72.3553	79.1561
35.64	9.44177	17.0683	28.5807	34.1617	35.6302	37.4778	32.94	3.27466	6.02637	12.0255	24.1124	23.6698	48.2283	72.3983	79.1749
35.74	9.47302	17.1074	28.612	34.1734	35.6349	37.4848	33.04	3.2793	6.04346	12.0529	24.1796	23.7362	48.3572	72.4327	79.214
35.84	9.51288	17.162	28.655	34.2047	35.6467	37.4973	33.14	3.29102	6.06543	12.0724	24.2452	23.826	48.4783	72.4718	79.2335
35.94	9.5191	17.2003	28.6854	34.2078	35.6498	37.4973	33.24	3.302	6.08105	12.1022	24.3024	23.8964	48.5979	72.5179	79.2531
36.04	9.57458	17.2675	28.7261	34.2437	35.674	37.5168	33.34	3.30347	6.10522	12.1388	24.3671	23.962	48.7244	72.5453	79.2843
36.14	9.60114	17.3105	28.7643	34.2515	35.6857	37.5239	33.44	3.32617	6.12012	12.1779	24.4476	24.0643	48.8728	72.589	79.307
36.24	9.61365	17.3378	28.7956	34.2711	35.6935	37.5247	33.54	3.32153	6.14429	12.2169	24.514	24.1378	48.979	72.6132	79.3195
36.34	9.63629	17.3769	28.8229	34.2828	35.6935	37.5333	33.64	3.33081	6.15356	12.2606	24.5936	24.2135	49.115	72.6522	79.339
36.44	9.66052	17.4277	28.8542	34.3023	35.7053	37.5364	33.74	3.3457	6.17554	12.3153	24.671	24.2994	49.2556	72.6906	79.3585
36.54	9.69958	17.4785	28.8932	34.3218	35.7131	37.5481	33.84	3.3606	6.19824	12.3568	24.7609	24.3683	49.3682	72.7203	79.3851
36.64	9.72772	17.5292	28.9128	34.3289	35.7248	37.5434	33.94	3.37305	6.22168	12.4005	24.8507	24.4628	49.5017	72.757	79.4061
36.74	9.76208	17.58	28.9557	34.3297	35.7365	37.5559	34.04	3.38477	6.23413	12.4232	24.9242	24.5214	49.6345	72.796	79.421
36.84	9.79333	17.6191	28.9948	34.3414	35.7412	37.5528	34.14	3.39331	6.24731	12.4442	25.0038	24.6002	49.7556	72.8195	79.4327
36.94	9.82928	17.666	29.0269	34.3656	35.7412	37.5645	34.24	3.41675	6.26929	12.4904	25.078	24.6659	49.8845	72.8553	79.4608
37.04	9.85193	17.6972	29.0604	34.3687	35.7513	37.5676	34.34	3.41992	6.28882	12.5333	25.1632	24.7433	50.022	72.9015	79.4757
37.14	9.88318	17.7558	29.0776	34.3804	35.7607	37.5793	34.44	3.43164	6.2959	12.5692	25.2531	24.826	50.158	72.9164	79.4952
37.24	9.90973	17.7949	29.112	34.4	35.7678	37.5746	34.54	3.427	6.30835	12.5958	25.3109	24.8815	50.251	72.953	79.5101
37.34	9.94177	17.8574	29.1432	34.4117	35.7756	37.5872	34.64	3.43091	6.32715	12.6146	25.3734	24.9581	50.3682	72.9899	79.5258
37.44	9.97302	17.8964	29.1628	34.4164	35.7873	37.5989	34.74	3.44727	6.35522	12.6537	25.4647	25.0448	50.4673	73.0116	79.5546
37.54	10.0121	17.9472	29.194	34.4234	35.7873	37.6036	34.84	3.45508	6.37622	12.6825	25.5421	25.1158	50.5688	73.0428	79.5812
37.64	10.0347	18.0011	29.2237	34.446	35.7935	37.5973	34.94	3.48633	6.40527	12.7404	25.632	25.2167	50.7166	73.0961	79.6124
37.74	10.0871	18.0644	29.2526	34.4851	35.8146	37.6262	35.04	3.49487	6.41772	12.7911	25.6827	25.2823	50.8213	73.1281	79.6273
37.84	10.1019	18.1316	29.28	34.5015	35.8264	37.6262	35.14	3.49805	6.4458	12.8373	25.7186	25.3534	50.9353	73.171	79.6366
37.94	10.1215	18.1777	29.2995	34.4976	35.8224	37.6215	35.24	3.50977	6.45605	12.8615	25.7797	25.4237	51.0447	73.2101	79.6515
38.04	10.1527	18.212	29.3386	34.5093	35.8311	37.6223	35.34	3.5044	6.44824	12.8966	25.8344	25.494	51.1377	73.2406	79.6664
38.14	10.1965	18.2605	29.3862	34.5336	35.8506	37.6473	35.44	3.53711	6.47168	12.9591	25.921	25.5643	51.2603	73.2928	79.6976
38.24	10.2222	18.3183	29.4128	34.5523	35.8576	37.6575	35.54	3.54175	6.48413	12.9904	25.9796	25.63	51.3572	73.3344	79.7069
38.34	10.2308	18.3574	29.4323	34.5601	35.8654	37.6528	35.64	3.54883	6.50049	13.0294	26.0453	25.6932	51.4744	73.3585	79.7101
38.44	10.2504	18.3964	29.4636	34.5718	35.8607	37.6653	35.74	3.55664	6.51538	13.0802	26.1053	25.7518	51.6025	73.4093	79.7296
38.54	10.2785	18.4472	29.4909	34.5914	35.8654	37.677	35.84	3.56372	6.53027	13.1115	26.171	25.8221	51.7439	73.432	79.7367
38.64	10.3051	18.4863	29.5222	34.5992	35.8732	37.6817	35.94	3.58398	6.55054	13.1615	26.257	25.9073	51.8696	73.4757	79.757
38.74	10.323	18.5284	29.5565	34.614	35.8881	37.6918	36.04	3.58862	6.5708	13.1942	26.3312	25.9752	51.9712	73.5084	79.7701
38.84	10.3324	18.5566	29.5807	34.6304	35.8967	37.6965	36.14	3.60425	6.59424	13.2372	26.4061	26.0299	52.083	73.5421	79.7843
38.94	10.3519	18.5956	29.6003	34.6382	35.9045	37.7036	36.24	3.6145	6.59741	13.267	26.4913	26.0956	52.197	73.5695	79.7992
39.04	10.3597	18.6394	29.6245	34.6429	35.9092	37.6973	36.34	3.60742	6.62866	13.3107	26.5616	26.1613	52.3018	73.6156	79.8116
39.14	10.4027	18.7089	29.6628	34.6812	35.9279	37.72	36.44	3.61914	6.64355	13.3302	26.639	26.2245	52.4009	73.6476	79.8312
39.24	10.4074	18.7441	29.6823	34.6812	35.924	37.7083	36.54	3.64331	6.66064	13.3707	26.7115	26.3041	52.522	73.6803	79.8553
39.34	10.4175	18.7902	29.6971	34.6843	35.931	37.7067	36.64	3.64575	6.68726	13.424	26.7992	26.3768	52.6338	73.7218	79.8788
39.44	10.4348	18.8308	29.7144	34.6906	35.9318	37.709	36.74	3.66919	6.71777	13.4615	26.8929	26.4777	52.7588	73.764	79.9039
39.54	10.4488	18.8839	29.7401	34.7	35.931	37.7083	36.84	3.67456	6.72314	13.5021	26.9718	26.5643	52.8533	73.7999	79.9132
39.64	10.4683	18.916	29.7526	34.7047	35.9357	37.7161	36.94	3.67773	6.7334	13.5248	27.0585	26.6346	52.9399	73.8265	79.9327
39.74	10.4855	18.9714	29.7964	34.7172	35.9482	37.7325	37.04	3.67773	6.74585	13.5575	27.1195	26.7198	53.0369	73.839	79.9359
39.84	10.5004	19.0058	29.8112	34.732	35.9435	37.7317	37.14	3.7019	6.7771	13.577	27.2147	26.7877	53.1509	73.86	79.9498
39.94	10.5168	19.0683	29.8425	34.739	35.9553	37.7278	37.24	3.70435	6.79663	13.6232	27.2921	26.8846	53.2627	73.9015	79.9757
40.04	10.5433	19.1074	29.8815	34.7398	35.9631	37.7426	37.34	3.71216	6.81616	13.653	27.3805	26.9698	53.3604	73.9313	79.9867
40.14	10.566	19.1691	29.9159	34.7546	35.9779	37.7504	37.44	3.72461	6.83105	13.6779	27.4601	27.0612	53.4626	73.9601	80.0109
40.24	10.5972	19.2214	29.9487	34.7758	35.9826	37.7598	37.54	3.73633	6.85205	13.7059	27.5468	27.1151	53.561	73.9874	80.0179
40.34	10.598	19.2511	29.9597	34.7711	35.9904	37.7582	37.64	3.74414	6.85522	13.7325	27.6202	27.2003	53.6611	74.007	80.0187
40.44	10.6293	19.2996	29.9909	34.7906	35.9904	37.7629	37.74	3.76831	6.89429	13.7723	27.6906	27.2565	53.7563	74.0624	80.0514
40.54	10.6379	19.3331	30.0175	34.7859	35.9873	37.7715	37.84	3.77612	6.90601	13.8099	27.7335	27.3229	53.865	74.0812	80.0656
40.64	10.6605	19.3652	30.0464	34.7984	35.9943	37.7786	37.94	3.7793	6.91455	13.8302	27.8085	27.3768	53.9619	74.0975	80.0734
40.74	10.6793	19.416	30.0682	34.8101	35.9943	37.7817	38.04	3.79102	6.9248	13.8615	27.8859	27.4542	54.0532	74.1241	80.0883
40.84	10.6926	19.4527	30.0933	34.8109	36.0068	37.7794	38.14	3.79028	6.92871	13.892	27.9554	27.5089	54.1494	74.1305	80.0844
40.94	10.7113	19.4933	30.112	34.8218	36.0178	37.7739	38.24	3.802	6.94189	13.9279	28.0062	27.587	54.2634	74.1554	80.0968
41.04	10.7426	19.5292	30.1432	34.8383	36.0256	37.7833	38.34	3.80737	6.96143	13.9801	28.0819	27.6549	54.3728	74.1866	80.1132
41.14	10.7754	19.5808	30.1792	34.85	36.0373	37.7864	38.44	3.82617	6.9834	14.0216	28.171	27.7291	54.4822	74.2179	80.1366
41.24	10.8051	19.6386	30.2104	34.8601	36.0451	37.7981	38.54	3.83398	6.99585	14.0607	28.246	27.7948	54.5884	74.2374	80.1515
41.34	10.8316	19.6777	30.237	34.8726	36.0568	37.8067	38.64	3.84888	7.01855	14.1029	28.3265	27.8761	54.6885	74.257	80.1617
41.44	10.8441	19.7089	30.2518	34.8726	36.0529	37.7934	38.74	3.86523	7.05444	14.1388	28.3969	27.951	54.79	74.2882	80.1593
41.54	10.8715	19.7363	30.2839	34.8843	36.0646	37.795	38.84	3.87451	7.07861	14.1896	28.4843	28.026	54.9048	74.3202	80.1803
41.64	10.9027	19.7792	30.3034	34.8922	36.0764	37.7934	38.94	3.88867	7.10059	14.2482	28.5695	28.0917	55.0017	74.3468	80.2023
41.74	10.9371	19.8292	30.3378	34.9101	36.0764	37.7981	39.04	3.89648	7.10986	14.2841	28.6515	28.1495	55.1228	74.3734	80.2218
41.84	10.9566	19.8691	30.362	34.9117	36.0764	37.7934	39.14	3.9082	7.12476	14.3302	28.7101	28.1979	55.2212	74.3976	80.2289
41.94	10.9808	19.9081	30.3885	34.9281	36.0881	37.7934	39.24	3.91284	7.14111	14.3856	28.7999	28.2604	55.3306	74.4413	80.2343
42.04	11.0121	19.9667	30.4128	34.9312	36.0959	37.8059	39.34	3.93945	7.17554	14.4318	28.8702	28.3339	55.4424	74.4796	80.2484
42.14	11.0199	19.9941	30.4253	34.9312	36.0959	37.7911	39.44	3.94263	7.19751	14.4615	28.9515	28.4027	55.533	74.5219	80.264
42.24	11.0558	20.0449	30.4518	34.9312	36.0959	37.8012	39.54	3.94263	7.20288	14.4982	29.0148	28.4557	55.6182	74.5311	80.2655
42.34	11.0707	20.0839	30.4667	34.9507	36.1154	37.7911	39.64	3.95508	7.23096	14.549	29.1053	28.5402	55.7322	74.5695	80.2921
42.44	11.1019	20.1347	30.4792	34.9507	36.1154	37.7981	39.74	3.9668	7.24585	14.588	29.1788	28.5917	55.8337	74.589	80.2999
42.54	11.1363	20.1941	30.4956	34.9703	36.1271	37.7934	39.84	3.97461	7.26538	14.6271	29.2491	28.6815	55.9431	74.6202	80.3116
42.64	11.1371	20.2167	30.5104	34.9703	36.1154	37.7911	39.94	3.97461	7.26855	14.6466	29.3077	28.7487	56.0095	74.6312	80.3195
42.74	11.1683	20.2628	30.53	34.9781	36.1232	37.7942	40.04	3.99097	7.30908	14.6779	29.3944	28.8534	56.1243	74.6718	80.3507
42.84	11.1918	20.2949	30.5417	34.982	36.1224	37.7934	40.14	4.0144	7.33569	14.7137	29.4672	28.9354	56.2166	74.7101	80.3624
42.94	11.2082	20.3456	30.5682	34.9898	36.1154	37.7864	40.24	4.01611	7.37012	14.7506	29.5421	29.0238	56.3167	74.7452	80.3702
43.04	11.2347	20.3964	30.5807	34.9898	36.1232	37.8012	40.34	4.04639	7.39893	14.7965	29.6053	29.101	56.4087	74.7882	80.3866
43.14	11.2621	20.4472	30.6089	35.0015	36.1232	37.7911	40.44	4.06372	7.42554	14.8497	29.6827	29.1737	56.5056	74.8273	80.4015
43.24	11.2933	20.4816	30.6237	35.0211	36.1349	37.7981	40.54	4.07617	7.43335	14.8763	29.7413	29.2394	56.6033	74.8468	80.4132
43.34	11.3246	20.5183	30.6479	35.0258	36.1396	37.8106	40.64	4.07617	7.45679	14.8966	29.8038	29.3026	56.7048	74.8781	80.4327
43.44	11.3519	20.573	30.6862	35.0445	36.1545	37.8293	40.74	4.09888	7.47949	14.931	29.8492	29.3761	56.7737	74.9008	80.4359
43.54	11.3746	20.6105	30.7089	35.0554	36.1693	37.8325	40.84	4.10352	7.49194	14.9552	29.9093	29.4479	56.8611	74.9366	80.4601
43.64	11.4074	20.6628	30.73	35.057	36.1787	37.8372	40.94	4.10498	7.50122	14.9794	29.9803	29.5065	56.9634	74.9491	80.453
43.74	11.4371	20.7003	30.7432	35.0671	36.1888	37.8403	41.04	4.11523	7.5271	15.0177	30.0382	29.5917	57.072	74.9952	80.4718
43.84	11.466	20.7527	30.7573	35.0765	36.1904	37.8466	41.14	4.12695	7.54663	15.045	30.0936	29.6495	57.1665	75.0116	80.475
43.94	11.4957	20.7902	30.7753	35.0867	36.2006	37.852	41.24	4.13159	7.57397	15.0809	30.1757	29.7174	57.2485	75.0311	80.4843
44.04	11.5168	20.8378	30.8034	35.1062	36.2131	37.8684	41.34	4.1582	7.59351	15.1271	30.2335	29.7682	57.3533	75.0695	80.5109
44.14	11.5316	20.8917	30.8229	35.1156	36.2131	37.8715	41.44	4.16138	7.6084	15.1693	30.2953	29.8324	57.4463	75.0953	80.514
44.24	11.566	20.9089	30.8425	35.1109	36.2248	37.8645	41.54	4.17773	7.64429	15.1974	30.3702	29.9003	57.5408	75.1241	80.5265
44.34	11.5871	20.9503	30.862	35.1226	36.2248	37.8762	41.64	4.18872	7.64893	15.2365	30.4406	29.9706	57.6306	75.1405	80.535
44.44	11.6019	20.9863	30.8815	35.1304	36.2248	37.8809	41.74	4.20508	7.65601	15.256	30.4984	30.0331	57.7048	75.1398	80.5453
44.54	11.6215	21.0378	30.8932	35.1422	36.2326	37.8762	41.84	4.20508	7.67554	15.2872	30.5695	30.0988	57.8142	75.171	80.5585
44.64	11.6363	21.0831	30.9128	35.1422	36.2326	37.8832	41.94	4.22461	7.70679	15.3341	30.6281	30.1698	57.9119	75.1984	80.5726
44.74	11.6605	21.1152	30.9323	35.1617	36.2326	37.8762	42.04	4.23242	7.7146	15.37	30.6984	30.2448	58.0017	75.2133	80.5858
44.84	11.6918	21.1542	30.937	35.1617	36.2443	37.8809	42.14	4.24414	7.72949	15.4161	30.757	30.2909	58.072	75.2257	80.5844
44.94	11.7113	21.2019	30.944	35.1812	36.2443	37.8879	42.24	4.24878	7.74658	15.4474	30.8319	30.3776	58.1782	75.2499	80.6014
45.04	11.7426	21.2363	30.9589	35.1812	36.2521	37.8879	42.34	4.26758	7.7771	15.4865	30.9093	30.4503	58.2556	75.2733	80.6085
45.14	11.7621	21.287	30.9714	35.1843	36.2521	37.8832	42.44	4.27539	7.80444	15.5223	30.9913	30.5409	58.3455	75.2882	80.6202
45.24	11.7863	21.3308	30.9878	35.2133	36.2686	37.8809	42.54	4.27539	7.81616	15.5607	31.0695	30.5917	58.4158	75.3116	80.6202
45.34	11.8207	21.3847	31.0222	35.2281	36.2834	37.9075	42.64	4.302	7.84595	15.6146	31.1547	30.6769	58.5205	75.3492	80.6429
45.44	11.8488	21.4277	31.0417	35.2398	36.2912	37.9106	42.74	4.31445	7.86304	15.6583	31.2296	30.7518	58.6228	75.3663	80.6593
45.54	11.8636	21.455	31.0612	35.2476	36.2912	37.9036	42.84	4.32617	7.88257	15.6896	31.2999	30.8221	58.7126	75.3859	80.671
45.64	11.891	21.5011	31.0807	35.2445	36.3029	37.9122	42.94	4.33398	7.9021	15.7404	31.3507	30.8893	58.7947	75.4093	80.671
45.74	11.9222	21.5331	31.0925	35.2515	36.3146	37.9153	43.04	4.3457	7.92163	15.7677	31.4288	30.9432	58.8845	75.4288	80.671
45.84	11.9418	21.5644	31.112	35.2625	36.3224	37.927	43.14	4.35815	7.94263	15.816	31.5038	30.9987	58.9548	75.453	80.6835
45.94	11.9613	21.6152	31.1315	35.2789	36.3224	37.9223	43.24	4.37695	7.96851	15.8732	31.5929	31.0956	59.033	75.4633	80.6906
46.04	11.9847	21.6542	31.1511	35.2867	36.3342	37.9153	43.34	4.36524	7.97632	15.9005	31.6476	31.13	59.0837	75.464	80.6906
46.14	12.016	21.705	31.1823	35.3101	36.3459	37.9348	43.44	4.38867	8.00757	15.9435	31.7296	31.1815	59.1853	75.496	80.7101
46.24	12.0355	21.7558	31.2065	35.3218	36.3459	37.9317	43.54	4.39648	8.0271	15.9708	31.7921	31.2323	59.2556	75.5109	80.7101
46.34	12.0551	21.787	31.2253	35.3344	36.3537	37.9387	43.64	4.39966	8.0498	16.0052	31.8539	31.298	59.3369	75.5289	80.7101
46.44	12.0894	21.8292	31.2479	35.3562	36.3568	37.9418	43.74	4.41602	8.06616	16.0411	31.9288	31.3495	59.4197	75.546	80.7218
46.54	12.1136	21.873	31.2753	35.3687	36.3615	37.9543	43.84	4.42065	8.07788	16.0653	32.0155	31.3939	59.4868	75.5624	80.7186
46.64	12.1449	21.9277	31.3081	35.3922	36.3849	37.9661	43.94	4.42773	8.08569	16.0919	32.0695	31.4503	59.5525	75.5773	80.7172
46.74	12.1644	21.9667	31.3229	35.3922	36.3849	37.9778	44.04	4.43872	8.1084	16.1295	32.1593	31.5135	59.626	75.589	80.725
46.84	12.1808	21.9949	31.3347	35.4086	36.3865	37.9747	44.14	4.46362	8.14111	16.1669	32.2303	31.5924	59.7063	75.6171	80.7382
46.94	12.1988	22.0323	31.3573	35.4117	36.392	37.9731	44.24	4.47144	8.16382	16.2013	32.2921	31.6691	59.7705	75.6398	80.7413
47.04	12.2347	22.0644	31.3815	35.4351	36.3967	37.9778	44.34	4.48633	8.17554	16.2286	32.3624	31.7128	59.822	75.6547	80.7491
47.14	12.2543	22.1121	31.3932	35.4429	36.3967	37.9895	44.44	4.50122	8.19824	16.2631	32.443	31.7667	59.9072	75.6703	80.764
47.24	12.2785	22.1464	31.4175	35.4594	36.4131	37.9942	44.54	4.49805	8.21924	16.3036	32.4843	31.8385	59.9673	75.6913	80.7655
47.34	12.2964	22.1855	31.4323	35.4625	36.4084	37.9973	44.64	4.50122	8.22632	16.3334	32.5531	31.9073	60.0361	75.7094	80.764
47.44	12.3207	22.2167	31.4518	35.4742	36.4162	37.9973	44.74	4.50586	8.24121	16.3615	32.6273	31.9628	60.1118	75.7264	80.7726
47.54	12.355	22.2706	31.4745	35.4851	36.431	38.0121	44.84	4.52539	8.27002	16.3966	32.6984	32.0182	60.1736	75.7491	80.7804
47.64	12.391	22.3027	31.4987	35.5046	36.4388	38.0168	44.94	4.53784	8.28955	16.4325	32.7584	32.0995	60.2485	75.7687	80.7928
47.74	12.4105	22.3535	31.5151	35.5172	36.4318	38.0247	45.04	4.54492	8.31616	16.4786	32.8312	32.1737	60.3142	75.7811	80.7999
47.84	12.4348	22.3894	31.5464	35.5336	36.4365	38.0294	45.14	4.552	8.33105	16.4935	32.8969	32.2198	60.3721	75.8024	80.7953
47.94	12.4683	22.4425	31.5682	35.5554	36.4506	38.0317	45.24	4.54492	8.33569	16.5131	32.9601	32.2596	60.4431	75.8077	80.7999
48.04	12.4933	22.4792	31.5854	35.5648	36.4482	38.0411	45.34	4.55273	8.35059	16.5372	33.014	32.3026	60.533	75.8273	80.8077
48.14	12.5199	22.537	31.6151	35.5844	36.4631	38.0481	45.44	4.56445	8.35132	16.5763	33.0695	32.3612	60.6033	75.8468	80.8077
48.24	12.5511	22.5808	31.6432	35.6031	36.4631	38.0559	45.54	4.57617	8.37476	16.6075	33.1281	32.4283	60.6619	75.85	80.8195
48.34	12.5941	22.6339	31.6745	35.6226	36.4834	38.0629	45.64	4.58789	8.40601	16.6434	33.2296	32.494	60.7556	75.8749	80.8312
48.44	12.6019	22.6542	31.6823	35.6226	36.467	38.0559	45.74	4.5957	8.41382	16.67	33.3163	32.5565	60.8337	75.8898	80.8344
48.54	12.6332	22.7089	31.7183	35.6422	36.4865	38.0645	45.84	4.61206	8.43018	16.7137	33.3749	32.6393	60.9041	75.8976	80.8436
48.64	12.6527	22.748	31.7479	35.6539	36.4865	38.0629	45.94	4.61914	8.45679	16.7599	33.4523	32.712	60.9595	75.9093	80.8507
48.74	12.6722	22.7792	31.7722	35.6656	36.4982	38.0559	46.04	4.63477	8.48413	16.8107	33.5179	32.7518	61.0518	75.9335	80.8585
48.84	12.6918	22.8183	31.7839	35.6734	36.4982	38.0676	46.14	4.64648	8.50366	16.8497	33.5812	32.8221	61.1228	75.9484	80.8702
48.94	12.723	22.8574	31.8034	35.6929	36.5099	38.0645	46.24	4.6543	8.52002	16.8842	33.6398	32.8925	61.1931	75.9601	80.8702
49.04	12.7473	22.9011	31.8307	35.7007	36.5178	38.0746	46.34	4.66284	8.53027	16.9161	33.6952	32.9745	61.2634	75.9796	80.8702
49.14	12.7668	22.9519	31.8472	35.7172	36.5256	38.0801	46.44	4.6582	8.53491	16.9559	33.7609	33.0526	61.322	75.9991	80.8781
49.24	12.7933	23.0097	31.862	35.732	36.5256	38.0942	46.54	4.66602	8.55444	16.9786	33.8312	33.1183	61.3923	76.014	80.8781
49.34	12.8121	23.0441	31.8768	35.7343	36.5326	38.0825	46.64	4.67773	8.57397	17.0216	33.8969	33.1698	61.4744	76.0187	80.8781
49.44	12.8324	23.0761	31.8784	35.732	36.5256	38.0833	46.74	4.68945	8.59351	17.049	33.9406	33.2369	61.5447	76.0265	80.8866
49.54	12.8636	23.1191	31.9081	35.7515	36.5404	38.095	46.84	4.69263	8.6084	17.0802	33.9991	33.2948	61.6001	76.046	80.8851
49.64	12.8949	23.1581	31.9323	35.7632	36.5451	38.1067	46.94	4.69727	8.62476	17.1115	34.0616	33.3534	61.6658	76.0577	80.8866
49.74	12.9097	23.1894	31.9518	35.7711	36.5451	38.1067	47.04	4.70508	8.62939	17.1459	34.1249	33.4237	61.7439	76.0577	80.882
49.84	12.9222	23.2167	31.9636	35.7797	36.5529	38.1114	47.14	4.7168	8.64429	17.1779	34.1906	33.5018	61.7947	76.0773	80.882
49.94	12.9535	23.248	31.9714	35.775	36.5498	38.1184	47.24	4.72461	8.66382	17.2091	34.2484	33.5448	61.865	76.0968	80.8851
50.04	12.9847	23.287	31.9909	35.7828	36.5568	38.1301	47.34	4.73633	8.68335	17.2482	34.3195	33.5917	61.9385	76.1053	80.8781
50.14	13.0121	23.33	32.0026	35.7945	36.5646	38.1379	47.44	4.75586	8.70679	17.2958	34.421	33.6542	62.0056	76.132	80.9015
50.24	13.0316	23.3691	32.0112	35.7945	36.5764	38.1332	47.54	4.75122	8.72632	17.3224	34.4867	33.705	62.0642	76.1515	80.9015
50.34	13.0629	23.4199	32.0143	35.8023	36.5764	38.1379	47.64	4.75903	8.74438	17.3522	34.5421	33.7543	62.1182	76.1742	80.9047
50.44	13.0824	23.4667	32.0339	35.814	36.5881	38.1348	47.74	4.77539	8.77002	17.3771	34.6039	33.8026	62.1736	76.1859	80.9139
50.54	13.1019	23.5097	32.0409	35.8257	36.5881	38.1301	47.84	4.78784	8.78955	17.4098	34.6639	33.8541	62.2563	76.203	80.9139
50.64	13.1332	23.5605	32.0534	35.8257	36.5959	38.1379	47.94	4.80664	8.81616	17.4467	34.746	33.9315	62.311	76.2179	80.9327
50.74	13.1527	23.5995	32.0729	35.8289	36.5912	38.145	48.04	4.81445	8.83105	17.4755	34.8116	33.994	62.3525	76.2328	80.9281
50.84	13.1722	23.6581	32.0847	35.8218	36.5959	38.1379	48.14	4.82617	8.84351	17.5021	34.8695	34.0526	62.3845	76.2374	80.921
50.94	13.2082	23.7136	32.1089	35.8383	36.6006	38.1505	48.24	4.83398	8.87476	17.5365	34.9406	34.1198	62.4548	76.257	80.921
51.04	13.23	23.7503	32.1307	35.8406	36.6076	38.1645	48.34	4.85034	8.89575	17.5536	35.0155	34.1901	62.4985	76.2733	80.9335
51.14	13.259	23.78	32.1362	35.8461	36.6006	38.17	48.44	4.86914	8.90991	17.5919	35.0702	34.2675	62.5564	76.2968	80.9491
51.24	13.2808	23.8331	32.1503	35.8601	36.6146	38.1723	48.54	4.87695	8.9248	17.6263	35.1195	34.3378	62.6025	76.2999	80.9445
51.34	13.2886	23.8769	32.1628	35.8531	36.6029	38.1739	48.64	4.8855	8.93726	17.6505	35.1664	34.3917	62.6541	76.3195	80.9515
51.44	13.3207	23.9277	32.1792	35.8656	36.5959	38.1762	48.74	4.88403	8.96387	17.6818	35.2172	34.4308	62.7119	76.3265	80.9398
51.54	13.3566	23.991	32.1909	35.889	36.6006	38.1817	48.84	4.89331	8.98096	17.7059	35.2701	34.526	62.7876	76.3436	80.9452
51.64	13.3918	24.0292	32.2175	35.8961	36.6154	38.2004	48.94	4.90039	9.00757	17.7521	35.3546	34.6034	62.8259	76.3656	80.9523
51.74	13.4144	24.0878	32.2323	35.8992	36.6123	38.2036	49.04	4.91528	9.01929	17.774	35.4156	34.6613	62.8799	76.3656	80.9594
51.84	13.4457	24.1386	32.2448	35.9039	36.6193	38.1965	49.14	4.91602	9.03882	17.8075	35.4686	34.7128	62.9204	76.3781	80.9601
51.94	13.4652	24.1894	32.2565	35.9156	36.6146	38.2051	49.24	4.92773	9.05371	17.8302	35.5304	34.7635	62.9744	76.3859	80.9569
52.04	13.5043	24.2285	32.2714	35.9281	36.6076	38.2083	49.34	4.93945	9.06616	17.8685	35.6078	34.8143	63.0447	76.3944	80.9523
52.14	13.5308	24.2839	32.2722	35.9421	36.6076	38.22	49.44	4.94727	9.08569	17.9005	35.671	34.8698	63.0955	76.4093	80.9476
52.24	13.5551	24.33	32.2886	35.9351	36.6029	38.2231	49.54	4.96216	9.10059	17.9396	35.7491	34.9354	63.1462	76.4288	80.9523
52.34	13.5715	24.3691	32.2956	35.9351	36.6076	38.2247	49.64	4.9668	9.10522	17.9872	35.8312	35.0057	63.2048	76.4406	80.9523
52.44	13.5941	24.4003	32.3151	35.9476	36.6154	38.2153	49.74	4.97144	9.13721	18.0216	35.903	35.0956	63.2603	76.4601	80.9569
52.54	13.6285	24.4425	32.33	35.9531	36.6154	38.2231	49.84	5.00122	9.16772	18.0756	35.9938	35.1769	63.3291	76.4874	80.975
52.64	13.6527	24.4863	32.3542	35.9507	36.6154	38.2356	49.94	5.00586	9.18726	18.1193	36.0499	35.244	63.3845	76.5062	80.9867
52.74	13.684	24.537	32.3737	35.9625	36.6154	38.2325	50.04	5.02539	9.19043	18.1583	36.1007	35.319	63.4236	76.5187	80.9796
52.84	13.7105	24.5878	32.3932	35.9703	36.6154	38.2231	50.14	5.04175	9.21606	18.2137	36.1725	35.3893	63.479	76.5311	80.9921
52.94	13.7355	24.6238	32.4128	35.9867	36.6318	38.2325	50.24	5.05347	9.22559	18.267	36.2601	35.462	63.5173	76.5577	80.9991
53.04	13.7621	24.6581	32.4175	35.982	36.6271	38.2356	50.34	5.04883	9.22632	18.2958	36.3116	35.494	63.5642	76.5577	80.9843
53.14	13.7902	24.6972	32.444	35.9937	36.6349	38.2442	50.44	5.05981	9.24902	18.3334	36.3851	35.5675	63.6064	76.5773	80.9945
53.24	13.8082	24.748	32.4518	36.0015	36.6349	38.2473	50.54	5.07617	9.27002	18.3771	36.4601	35.6183	63.6736	76.589	80.9991
53.34	13.8277	24.7941	32.4706	35.9968	36.6302	38.2496	50.64	5.07617	9.28491	18.4037	36.5304	35.6666	63.7244	76.6039	80.9991
53.44	13.8519	24.8378	32.4831	36.0132	36.6349	38.2473	50.74	5.0957	9.2998	18.4403	36.5726	35.7206	63.7947	76.6046	81.0062
53.54	13.8785	24.8691	32.4979	36.0211	36.6467	38.2543	50.84	5.10742	9.32397	18.474	36.6444	35.7518	63.8337	76.6163	80.9991
53.64	13.9183	24.923	32.5104	36.0289	36.6545	38.2629	50.94	5.11523	9.34351	18.4911	36.6906	35.8104	63.8923	76.6359	81.0038
53.74	13.9348	24.955	32.53	36.0289	36.6545	38.2629	51.04	5.13159	9.3645	18.545	36.7733	35.8612	63.936	76.649	81.0038
53.84	13.9582	25.0027	32.5464	36.0328	36.6514	38.2598	51.14	5.14648	9.38647	18.6075	36.8702	35.912	63.9861	76.6593	81.0109
53.94	13.9918	25.0441	32.5604	36.0359	36.6537	38.2708	51.24	5.16138	9.40454	18.642	36.9554	35.9628	64.0283	76.682	81.0258
54.04	14.0199	25.0886	32.5854	36.0461	36.667	38.2715	51.34	5.17383	9.42163	18.6708	36.9945	36.0409	64.0916	76.6984	81.0258
54.14	14.0511	25.1464	32.6003	36.0718	36.674	38.2864	51.44	5.19019	9.44507	18.7216	37.0624	36.1354	64.1306	76.7062	81.0233
54.24	14.0598	25.1777	32.612	36.064	36.6732	38.2786	51.54	5.20508	9.4646	18.7599	37.1171	36.2081	64.1814	76.7296	81.0382
54.34	14.0863	25.2167	32.6354	36.0671	36.6662	38.2786	51.64	5.20508	9.47241	18.799	37.1593	36.2909	64.2322	76.7374	81.0382
54.44	14.1058	25.2597	32.6432	36.0718	36.6662	38.2903	51.74	5.20898	9.49268	18.8177	37.2218	36.3534	64.2751	76.7413	81.0304
54.54	14.1394	25.298	32.6659	36.0828	36.6818	38.3012	51.84	5.22388	9.51074	18.8575	37.3024	36.4386	64.3291	76.7594	81.0453
54.64	14.1683	25.3456	32.6784	36.0875	36.6935	38.3137	51.94	5.22461	9.53027	18.8842	37.3468	36.5065	64.3689	76.7531	81.035
54.74	14.1996	25.3925	32.6901	36.0992	36.7014	38.309	52.04	5.23633	9.54272	18.8966	37.4257	36.5604	64.4001	76.7616	81.0382
54.84	14.2191	25.4355	32.7097	36.107	36.7014	38.3106	52.14	5.24414	9.55908	18.9357	37.4867	36.6378	64.436	76.7765	81.0336
54.94	14.2394	25.4667	32.7097	36.0992	36.6935	38.2981	52.24	5.24878	9.57861	18.9716	37.5311	36.7057	64.4868	76.7882	81.0428
55.04	14.2543	25.5058	32.7214	36.0992	36.7053	38.2981	52.34	5.26758	9.59741	18.9982	37.6007	36.7753	64.5173	76.7882	81.0421
55.14	14.2886	25.5566	32.7409	36.1109	36.7053	38.3012	52.44	5.2793	9.61694	19.049	37.6678	36.8456	64.5759	76.8046	81.0421
55.24	14.3011	25.5956	32.7409	36.1109	36.7053	38.3059	52.54	5.28247	9.63647	19.0802	37.7257	36.8995	64.6267	76.8116	81.0389
55.34	14.3324	25.6464	32.7526	36.1234	36.7053	38.3028	52.64	5.28711	9.65527	19.1193	37.7797	36.9628	64.658	76.8195	81.0414
55.44	14.3613	25.6902	32.7769	36.1422	36.717	38.3028	52.74	5.29175	9.67236	19.1552	37.8553	37.015	64.7095	76.8358	81.0389
55.54	14.3949	25.7363	32.7917	36.1422	36.7248	38.3246	52.84	5.30981	9.67871	19.1849	37.9164	37.0675	64.7588	76.8492	81.0453
55.64	14.4027	25.7675	32.7995	36.1304	36.7131	38.3145	52.94	5.32617	9.70288	19.2255	37.9991	37.1112	64.8018	76.8585	81.0453
55.74	14.4293	25.8144	32.8112	36.1382	36.7131	38.3176	53.04	5.33398	9.73413	19.2404	38.0648	37.162	64.8337	76.8663	81.0382
55.84	14.4535	25.8574	32.8276	36.15	36.7131	38.3246	53.14	5.3457	9.75049	19.2716	38.1202	37.2323	64.8728	76.8859	81.0382
55.94	14.473	25.9042	32.8347	36.1547	36.7131	38.3176	53.24	5.35815	9.77002	19.299	38.1803	37.3073	64.9282	76.899	81.0546
56.04	14.4957	25.955	32.8542	36.1695	36.7131	38.3176	53.34	5.37695	9.79199	19.3419	38.2484	37.3605	64.9626	76.9164	81.0616
56.14	14.523	25.9777	32.8651	36.1843	36.7248	38.3286	53.44	5.37695	9.80762	19.3724	38.2914	37.423	64.9971	76.9125	81.0531
56.24	14.5527	26.03	32.8901	36.1859	36.7295	38.3301	53.54	5.38477	9.83179	19.4044	38.3585	37.4752	65.0408	76.9249	81.0624
56.34	14.5738	26.0675	32.8964	36.196	36.7279	38.3286	53.64	5.39648	9.85132	19.4474	38.4335	37.5409	65.0916	76.9398	81.0577
56.44	14.6097	26.123	32.9128	36.2086	36.7326	38.345	53.74	5.39185	9.87476	19.4559	38.4913	37.587	65.1228	76.9366	81.0499
56.54	14.6246	26.1542	32.9206	36.2086	36.7443	38.345	53.84	5.40112	9.89893	19.495	38.5546	37.6471	65.1587	76.9381	81.0663
56.64	14.6488	26.1933	32.9323	36.2203	36.7443	38.3528	53.94	5.41602	9.92554	19.5287	38.6046	37.7323	65.2126	76.9601	81.0734
56.74	14.6801	26.2527	32.9636	36.232	36.756	38.3645	54.04	5.41602	9.92871	19.5372	38.6351	37.7877	65.2322	76.9562	81.0695
56.84	14.6996	26.2823	32.9714	36.2476	36.756	38.3645	54.14	5.42383	9.94434	19.5834	38.7133	37.8566	65.2861	76.9664	81.0797
56.94	14.7277	26.3261	32.9831	36.2593	36.767	38.3645	54.24	5.42773	9.9646	19.6075	38.7882	37.9191	65.3337	76.9679	81.0695
57.04	14.7426	26.3652	32.9948	36.2711	36.7717	38.3645	54.34	5.42773	9.99658	19.6388	38.8405	37.972	65.397	76.9889	81.0709
57.14	14.7621	26.373	33.0057	36.2562	36.7717	38.3645	54.44	5.44727	10.0154	19.67	38.9249	38.037	65.4353	76.9991	81.0734
57.24	14.8058	26.4254	33.0347	36.2679	36.7928	38.3809	54.54	5.44727	10.0356	19.6903	38.9913	38.0643	65.4758	76.9991	81.0741
57.34	14.8277	26.462	33.0417	36.2695	36.7904	38.3715	54.64	5.45508	10.0693	19.7435	39.0648	38.1261	65.5205	77.0219	81.0797
57.44	14.8519	26.491	33.0659	36.2836	36.7959	38.3817	54.74	5.45898	10.0825	19.7645	39.1124	38.1659	65.5518	77.0382	81.0695
57.54	14.8793	26.537	33.0807	36.3023	36.8029	38.4075	54.84	5.46362	10.1021	19.8075	39.1827	38.2128	65.5884	77.0514	81.0858
57.64	14.9105	26.5761	33.1042	36.3023	36.8177	38.4028	54.94	5.48169	10.1318	19.8568	39.2562	38.2831	65.6494	77.0648	81.0883
57.74	14.9301	26.6074	33.1237	36.3101	36.8224	38.3958	55.04	5.48169	10.1443	19.8771	39.3163	38.3339	65.6768	77.0726	81.0812
57.84	14.9543	26.6534	33.1432	36.3101	36.8193	38.3958	55.14	5.49414	10.1592	19.9154	39.3585	38.3761	65.7126	77.0773	81.089
57.94	14.9926	26.6738	33.1745	36.3101	36.8264	38.3958	55.24	5.49561	10.1763	19.9371	39.4139	38.4127	65.7297	77.0897	81.0773
58.04	15.0191	26.7167	33.2206	36.3336	36.849	38.4239	55.34	5.49805	10.1951	19.963	39.4359	38.4791	65.7751	77.0975	81.0695
58.14	15.0316	26.7675	33.2214	36.3336	36.8654	38.4262	55.44	5.49658	10.2146	20.0006	39.4991	38.5402	65.8174	77.0992	81.0695
58.24	15.0511	26.8035	33.2183	36.3336	36.8654	38.427	55.54	5.51831	10.2388	20.0419	39.5546	38.608	65.8696	77.1163	81.0858
58.34	15.0707	26.8527	33.2089	36.3414	36.8607	38.4223	55.64	5.52222	10.2537	20.0763	39.6202	38.6886	65.8994	77.1132	81.0765
58.44	15.0855	26.8847	33.1901	36.3297	36.8498	38.4122	55.74	5.5293	10.2607	20.1083	39.6664	38.7323	65.9087	77.1085	81.0695
58.54	15.1019	26.9277	33.2284	36.3367	36.8701	38.4192	55.84	5.53638	10.2849	20.1427	39.7413	38.8143	65.9424	77.1202	81.078
58.64	15.1293	26.9667	33.2214	36.3461	36.8849	38.4301	55.94	5.52856	10.2881	20.1732	39.7882	38.8761	65.9541	77.1266	81.0648
58.74	15.1574	27.0222	33.2378	36.3578	36.8967	38.4317	56.04	5.54028	10.3201	20.2123	39.8585	38.9479	65.9868	77.1554	81.0648
58.84	15.1691	27.0488	33.2722	36.3648	36.9092	38.4465	56.14	5.54639	10.3403	20.2528	39.9327	38.9987	66.0134	77.1569	81.0624
58.94	15.1941	27.1066	33.2956	36.3601	36.9115	38.4418	56.24	5.55664	10.3599	20.2841	40.0038	39.0643	66.0376	77.1639	81.0624
59.04	15.2386	27.1464	33.3034	36.3609	36.8881	38.4473	56.34	5.55981	10.3787	20.3341	40.0616	39.1151	66.0791	77.1813	81.0734
59.14	15.2551	27.1738	33.3182	36.3609	36.9006	38.4496	56.44	5.573	10.3748	20.3568	40.1156	39.1613	66.1228	77.1835	81.057
59.24	15.2972	27.2097	33.3268	36.3734	36.9295	38.4794	56.54	5.58081	10.3989	20.3934	40.1757	39.2174	66.1633	77.203	81.0546
59.34	15.3441	27.2792	33.3901	36.4109	36.9396	38.5356	56.64	5.59106	10.4209	20.4154	40.2054	39.2784	66.197	77.2133	81.0499
59.44	15.3558	27.3105	33.4089	36.3937	36.9404	38.5325	56.74	5.58789	10.4404	20.4396	40.2491	39.3253	66.2151	77.2211	81.0421
59.54	15.4301	27.3995	33.4784	36.446	36.9732	38.5637	56.84	5.57935	10.4529	20.4591	40.2882	39.3971	66.24	77.2343	81.0382
59.64	15.4769	27.455	33.4761	36.45	36.9201	38.5801	56.94	5.58862	10.4692	20.4904	40.3195	39.4401	66.2634	77.246	81.0421
59.74	15.4496	27.4785	33.4909	36.4867	36.917	38.6168	57.04	5.60425	10.4958	20.5262	40.382	39.494	66.311	77.2679	81.0421
59.84	15.5746	27.6129	33.748	36.5383	37.2397	38.7192	57.14	5.6145	10.5239	20.5677	40.421	39.5597	66.3455	77.2758	81.0375
59.94	15.5621	27.3394	33.3526	36.3726	36.2451	37.9497	57.24	5.60596	10.5303	20.6029	40.4484	39.6261	66.3635	77.2648	81.0336
60.04	14.9003	27.8777	31.7221	36.4132	32.2841	31.9942	57.34	5.62451	10.5662	20.6481	40.4921	39.7025	66.4016	77.2928	81.0397
60.14	15.787	27.2644	33.8306	35.2342	38.2364	38.1535	57.44	5.62695	10.5779	20.6818	40.5616	39.7706	66.4275	77.3116	81.0421
60.24	15.6449	27.1347	33.9409	35.9812	37.0748	38.1379	57.54	5.63721	10.5889	20.7076	40.6188	39.8253	66.4775	77.318	81.0289
60.34	15.7003	27.6917	33.587	36.4249	36.5224	37.6793	57.64	5.65576	10.6248	20.756	40.6913	39.9135	66.5259	77.3365	81.028
60.44	15.7269	27.7089	33.5862	36.4656	36.4818	37.8129	57.74	5.6582	10.6443	20.7958	40.7609	39.9667	66.5713	77.3507	81.0179
60.54	15.6019	27.7198	33.4979	36.4515	36.5506	37.8481	57.84	5.67773	10.6528	20.8419	40.8163	40.0323	66.615	77.3702	81.0109
60.64	15.6965	27.8902	33.5128	36.3664	36.4889	37.7864	57.94	5.68237	10.6606	20.8693	40.8866	40.0768	66.6438	77.3781	81.0038
60.74	15.4926	27.6941	33.4245	36.3578	36.4631	37.6575	58.04	5.70435	10.699	20.9052	40.9594	40.1808	66.6807	77.3944	81.0226
60.84	15.48	27.5792	33.4229	36.3242	36.4904	37.5825	58.14	5.71216	10.7139	20.942	41.014	40.2355	66.708	77.4164	81.0304
60.94	15.4613	27.6347	33.394	36.2672	36.4623	37.6028	58.24	5.72144	10.7263	20.9755	41.089	40.2955	66.7485	77.4288	81.0304
61.04	15.4847	27.6628	33.3784	36.2523	36.4725	37.6192	58.34	5.72925	10.7388	21.0177	41.1608	40.3463	66.7681	77.4366	81.0187
61.14	15.5121	27.6855	33.3932	36.3187	36.506	37.6575	58.44	5.74341	10.7654	21.049	41.2367	40.4073	66.8096	77.4484	81.0304
61.24	15.5199	27.705	33.4206	36.3297	36.5412	37.6809	58.54	5.74805	10.7842	21.0919	41.2531	40.4518	66.8259	77.4554	81.0194
61.34	15.559	27.7722	33.455	36.3484	36.5576	37.7208	58.64	5.76758	10.7998	21.1115	41.3148	40.4926	66.8635	77.4711	81.0133
61.44	15.5676	27.7675	33.4448	36.3148	36.5568	37.7239	58.74	5.76294	10.824	21.1459	41.382	40.5526	66.8923	77.4921	81.0109
61.54	15.5785	27.7863	33.4557	36.3109	36.5529	37.7278	58.84	5.77539	10.8435	21.1779	41.4406	40.608	66.9282	77.507	81.014
61.64	15.5582	27.7628	33.4401	36.3203	36.5162	37.7239	58.94	5.78784	10.856	21.2052	41.4874	40.6425	66.9478	77.5194	80.9999
61.74	15.566	27.7636	33.4745	36.3297	36.5326	37.7192	59.04	5.802	10.8943	21.2365	41.5382	40.6932	66.9939	77.5414	81.007
61.84	15.6019	27.7449	33.4878	36.3148	36.535	37.7177	59.14	5.80273	10.9224	21.2645	41.5936	40.7206	67.033	77.5577	81.0038
61.94	15.5676	27.7206	33.4683	36.2828	36.506	37.6887	59.24	5.81128	10.9209	21.299	41.6469	40.7877	67.0596	77.5624	80.9991
62.04	15.5699	27.7081	33.4737	36.2437	36.5013	37.684	59.34	5.81836	10.9333	21.3138	41.6906	40.8339	67.0916	77.5773	80.9991
62.14	15.5363	27.6777	33.4487	36.196	36.4717	37.6622	59.44	5.83789	10.9497	21.338	41.757	40.8925	67.1079	77.589	80.9991
62.24	15.5347	27.6808	33.4323	36.189	36.4271	37.634	59.54	5.84888	10.9717	21.3802	41.8077	40.9418	67.1377	77.5875	81.0094
62.34	15.5511	27.698	33.4323	36.1742	36.4318	37.6411	59.64	5.87695	10.9958	21.4279	41.8898	41.0018	67.1736	77.6163	81.0187
62.44	15.5637	27.705	33.4323	36.15	36.4514	37.6262	59.74	5.89185	11.0107	21.452	41.9406	41.0721	67.2048	77.6359	81.0187
62.54	15.5824	27.7245	33.4206	36.1382	36.4514	37.6145	59.84	5.88477	11.0154	21.4786	41.9991	41.1261	67.2244	77.6476	81.0187
62.64	15.5824	27.7379	33.4245	36.1508	36.4647	37.6161	59.94	5.89258	11.0349	21.5177	42.0648	41.1666	67.2556	77.6639	81.0187
62.74	15.591	27.7238	33.4175	36.1343	36.467	37.6059	60.04	5.91211	11.0576	21.5685	42.1359	41.2206	67.2908	77.6703	81.0233
62.84	15.573	27.7316	33.4276	36.1406	36.4701	37.5825	60.14	5.92383	11.0623	21.5958	42.1952	41.2596	67.3174	77.6749	81.0187
62.94	15.5707	27.712	33.4159	36.1335	36.4584	37.5559	60.24	5.93164	11.0669	21.6224	42.2491	41.3221	67.3298	77.6749	81.0187
63.04	15.5707	27.705	33.4058	36.1234	36.4365	37.5278	60.34	5.948	11.0864	21.6395	42.3124	41.3807	67.3657	77.6991	81.0233
63.14	15.5793	27.7214	33.4128	36.132	36.4521	37.5262	60.44	5.96216	11.1123	21.6927	42.3844	41.4354	67.3962	77.7133	81.0492
63.24	15.573	27.712	33.405	36.1179	36.4459	37.5074	60.54	5.96436	11.113	21.7216	42.4139	41.4752	67.4158	77.7108	81.0468
63.34	15.5684	27.7097	33.3784	36.0992	36.4334	37.5028	60.64	5.97852	11.1248	21.7677	42.4718	41.5331	67.4431	77.7374	81.0538
63.44	15.5824	27.7214	33.3854	36.1109	36.4279	37.5168	60.74	5.99023	11.1528	21.8075	42.5616	41.6027	67.4666	77.7577	81.0656
63.54	15.5824	27.7285	33.369	36.0914	36.431	37.5121	60.84	5.99805	11.1677	21.8341	42.632	41.6346	67.4939	77.7609	81.0656
63.64	15.5871	27.7206	33.3589	36.0883	36.4287	37.5051	60.94	6.01294	11.1826	21.8522	42.6891	41.6769	67.5088	77.7758	81.0687
63.74	15.5941	27.7285	33.3464	36.0836	36.431	37.4903	61.04	6.00586	11.1787	21.8654	42.7374	41.7206	67.5283	77.7687	81.0616
63.84	15.5972	27.7206	33.3347	36.0718	36.4287	37.4942	61.14	6.02539	11.2029	21.9083	42.7999	41.8026	67.5525	77.7882	81.0734
63.94	15.6136	27.7238	33.3495	36.0789	36.4474	37.4926	61.24	6.02539	11.2146	21.9279	42.8358	41.8534	67.572	77.7999	81.0734
64.04	15.6136	27.7253	33.3464	36.0765	36.4396	37.4895	61.34	6.04492	11.2388	21.9747	42.9093	41.9198	67.5994	77.8031	81.0812
64.14	15.6136	27.7238	33.3347	36.0867	36.4396	37.4778	61.44	6.04492	11.2537	22.006	42.9679	41.9901	67.6189	77.8038	81.0695
64.24	15.6168	27.7198	33.33	36.0945	36.431	37.4731	61.54	6.06836	11.2771	22.049	43.0499	42.0604	67.6501	77.8273	81.0812
64.34	15.6183	27.7214	33.3198	36.0883	36.4357	37.4677	61.64	6.07617	11.2966	22.088	43.1085	42.108	67.6665	77.839	81.0883
64.44	15.6136	27.7089	33.3151	36.0836	36.4357	37.4622	61.74	6.0957	11.3193	22.1154	43.1625	42.1573	67.6931	77.8546	81.0936
64.54	15.6105	27.7136	33.3081	36.0883	36.4279	37.4504	61.84	6.0957	11.3318	22.1434	43.2062	42.2089	67.708	77.8546	81.1007
64.64	15.6207	27.7238	33.3104	36.0867	36.424	37.4418	61.94	6.11523	11.363	22.1896	43.2687	42.2909	67.7322	77.8734	81.1078
64.74	15.6136	27.705	33.2917	36.0718	36.4123	37.427	62.04	6.11523	11.3748	22.2208	43.3077	42.3534	67.7517	77.8741	81.1007
64.84	15.6136	27.705	33.2948	36.0648	36.4045	37.427	62.14	6.12695	11.3896	22.2482	43.3781	42.4198	67.7681	77.8741	81.1007
64.94	15.6168	27.705	33.28	36.0718	36.4045	37.4106	62.24	6.12695	11.3904	22.2716	43.4257	42.4706	67.783	77.8827	81.1007
65.04	15.6215	27.705	33.2722	36.0718	36.4092	37.4036	62.34	6.13477	11.3989	22.306	43.4913	42.5409	67.8025	77.8859	81.1007
65.14	15.6097	27.6972	33.2604	36.064	36.4045	37.4083	62.44	6.1543	11.4216	22.3458	43.5382	42.6112	67.822	77.9054	81.1163
65.24	15.6097	27.6972	33.2487	36.0554	36.3967	37.3958	62.54	6.1543	11.4412	22.3771	43.589	42.6549	67.8416	77.9125	81.1132
65.34	15.6215	27.6972	33.2409	36.0601	36.3998	37.3879	62.64	6.16602	11.4529	22.4044	43.6476	42.701	67.8564	77.9132	81.1007
65.44	15.6215	27.712	33.2456	36.0601	36.4045	37.3911	62.74	6.18555	11.4841	22.4474	43.7054	42.7948	67.8923	77.9249	81.1124
65.54	15.6262	27.7167	33.2526	36.0601	36.4045	37.3958	62.84	6.18555	11.4958	22.4786	43.7491	42.8488	67.9119	77.9249	81.1202
65.64	15.6332	27.7097	33.2448	36.0601	36.4045	37.3809	62.94	6.19727	11.5271	22.5294	43.8195	42.8925	67.9431	77.9562	81.132
65.74	15.6332	27.712	33.2331	36.0601	36.4014	37.3879	63.04	6.20581	11.5388	22.5575	43.8639	42.9401	67.9712	77.953	81.1288
65.84	15.6332	27.705	33.2331	36.0523	36.3967	37.3684	63.14	6.20435	11.5466	22.5919	43.9054	42.9745	67.9829	77.9569	81.1241
65.94	15.6332	27.7097	33.2253	36.0523	36.3967	37.3731	63.24	6.20508	11.574	22.6388	43.9718	43.0214	68.0088	77.9601	81.132
66.04	15.641	27.7245	33.2214	36.0601	36.3998	37.3793	63.34	6.21216	11.5811	22.6654	43.9984	43.0551	68.04	77.9554	81.1273
66.14	15.6332	27.7167	33.2136	36.0601	36.3928	37.3762	63.44	6.20972	11.595	22.702	44.0546	43.0963	68.0618	77.9608	81.1366
66.24	15.6332	27.7167	33.2167	36.0484	36.381	37.3645	63.54	6.23633	11.6169	22.7404	44.1124	43.1425	68.0955	77.9796	81.139
66.34	15.6215	27.7167	33.2097	36.0406	36.381	37.3614	63.64	6.24414	11.6365	22.7794	44.171	43.1815	68.115	77.9945	81.132
66.44	15.6215	27.7167	33.1979	36.0406	36.3732	37.3567	63.74	6.25122	11.6514	22.8138	44.2367	43.2277	68.1416	77.9945	81.1351
66.54	15.6183	27.7136	33.1948	36.0305	36.3584	37.345	63.84	6.26758	11.6755	22.8615	44.2758	43.2831	68.1736	77.9991	81.1398
66.64	15.6136	27.7089	33.1823	36.0328	36.3537	37.3372	63.94	6.27539	11.6951	22.8888	44.3195	43.319	68.2048	78.007	81.1398
66.74	15.6136	27.6972	33.1823	36.025	36.3459	37.3372	64.04	6.27539	11.7146	22.92	44.382	43.3534	68.2244	78.0038	81.1398
66.84	15.6089	27.6925	33.1659	36.0234	36.3412	37.3254	64.14	6.28711	11.7334	22.9591	44.421	43.4042	68.2439	78.0187	81.1398
66.94	15.6215	27.6972	33.1753	36.0258	36.3389	37.3419	64.24	6.28711	11.7341	22.974	44.4882	43.4432	68.2705	78.0304	81.1515
67.04	15.6332	27.6972	33.1745	36.0328	36.3459	37.3325	64.34	6.29956	11.7654	23.0028	44.5421	43.494	68.283	78.0336	81.1469
67.14	15.6215	27.6941	33.1745	36.025	36.3381	37.3293	64.44	6.31836	11.7732	23.0411	44.5765	43.5526	68.3025	78.0382	81.1398
67.24	15.6215	27.6894	33.1597	36.025	36.3264	37.3176	64.54	6.31445	11.7732	23.0685	44.6202	43.6034	68.322	78.0265	81.1281
67.34	15.6215	27.6894	33.1472	36.0132	36.3264	37.3059	64.64	6.33789	11.7927	23.1068	44.6906	43.6737	68.3533	78.0577	81.1366
67.44	15.6215	27.6894	33.1354	36.0132	36.3193	37.2981	64.74	6.33081	11.8169	23.12	44.7225	43.7174	68.3743	78.0624	81.1249
67.54	15.6136	27.6847	33.1354	36.0132	36.3185	37.3028	64.84	6.35742	11.8435	23.1583	44.7953	43.7753	68.3962	78.0741	81.1398
67.64	15.6136	27.6824	33.1276	36.0132	36.3068	37.2981	64.94	6.37231	11.8669	23.2059	44.8624	43.8409	68.4229	78.0929	81.1515
67.74	15.6136	27.6847	33.119	35.9984	36.299	37.2903	65.04	6.38867	11.8833	23.2208	44.9061	43.8971	68.447	78.1007	81.1515
67.84	15.6136	27.6824	33.112	35.989	36.3021	37.2786	65.14	6.38867	11.8865	23.2521	44.9523	43.9425	68.4666	78.1007	81.1586
67.94	15.6136	27.6894	33.1089	35.9937	36.2951	37.2817	65.24	6.39648	11.8982	23.2833	45.0109	44.0018	68.4814	78.1078	81.1515
68.04	15.6136	27.6894	33.1112	35.982	36.2951	37.2637	65.34	6.4082	11.9163	23.3209	45.0648	44.0643	68.4971	78.1163	81.1593
68.14	15.6136	27.6894	33.1089	35.982	36.2998	37.2621	65.44	6.41602	11.9333	23.3497	45.1273	44.1034	68.5181	78.1351	81.1593
68.24	15.6136	27.6777	33.1042	35.982	36.299	37.259	65.54	6.41602	11.9333	23.3771	45.1788	44.1573	68.533	78.1359	81.1593
68.34	15.6136	27.6777	33.0964	35.9742	36.299	37.2473	65.64	6.42383	11.9497	23.3934	45.2179	44.201	68.5408	78.1359	81.1547
68.44	15.605	27.6808	33.0995	35.9656	36.2904	37.2387	65.74	6.43237	11.9614	23.4247	45.2701	44.2565	68.5493	78.1522	81.1444
68.54	15.6066	27.6824	33.0925	35.9672	36.292	37.2372	65.84	6.43799	11.9795	23.4545	45.318	44.2863	68.5627	78.1508	81.1547
68.64	15.6019	27.6777	33.0847	35.9515	36.2795	37.2278	65.94	6.44336	12.0037	23.4865	45.3749	44.3463	68.5916	78.1671	81.1593
68.74	15.6019	27.6699	33.0776	35.9351	36.2795	37.22	66.04	6.45508	12.0232	23.5131	45.4093	44.3729	68.5962	78.1749	81.1639
68.84	15.6019	27.6699	33.0729	35.9351	36.2631	37.22	66.14	6.46753	12.0513	23.5419	45.4601	44.4362	68.6079	78.1991	81.1639
68.94	15.6097	27.6777	33.0729	35.9265	36.2686	37.2161	66.24	6.47461	12.0732	23.5802	45.5187	44.494	68.6345	78.2179	81.171
69.04	15.6097	27.6777	33.0729	35.9117	36.2639	37.2083	66.34	6.48633	12.0857	23.6044	45.5812	44.5331	68.6462	78.2133	81.1664
69.14	15.6019	27.6777	33.0612	35.9117	36.256	37.1965	66.44	6.49097	12.1052	23.631	45.6171	44.5909	68.6736	78.2179	81.1561
69.24	15.5972	27.673	33.0565	35.907	36.2513	37.1918	66.54	6.4856	12.1169	23.6544	45.6586	44.6151	68.6853	78.2179	81.139
69.34	15.5949	27.666	33.0495	35.8882	36.2326	37.1817	66.64	6.50269	12.1411	23.6935	45.6952	44.6464	68.7095	78.2343	81.1483
69.44	15.6019	27.666	33.0417	35.8882	36.2248	37.177	66.74	6.51685	12.1631	23.713	45.7531	44.7018	68.74	78.246	81.1554
69.54	15.6019	27.6613	33.0347	35.8882	36.2131	37.1684	66.84	6.49805	12.1638	23.7404	45.7772	44.7245	68.7432	78.2413	81.1515
69.64	15.5902	27.6542	33.0417	35.8804	36.2131	37.1653	66.94	6.52075	12.1982	23.7701	45.8383	44.7738	68.7471	78.2445	81.15
69.74	15.6019	27.666	33.0487	35.8773	36.2279	37.1739	67.04	6.52148	12.2107	23.795	45.8773	44.7987	68.7595	78.257	81.1476
69.84	15.6019	27.666	33.0417	35.8726	36.2248	37.1606	67.14	6.53003	12.2224	23.8114	45.9171	44.8463	68.7712	78.257	81.1476
69.94	15.6019	27.666	33.0417	35.8648	36.2131	37.1575	67.24	6.53784	12.2434	23.8622	45.9874	44.8971	68.7954	78.2811	81.1522
70.04	15.6019	27.6707	33.0339	35.8531	36.2131	37.1575	67.34	6.55664	12.2654	23.9083	46.0304	44.9581	68.822	78.2836	81.1639
70.14	15.5972	27.6777	33.0222	35.8562	36.21	37.1458	67.44	6.56763	12.2881	23.9506	46.0804	45.005	68.8564	78.2914	81.1625
70.24	15.5902	27.673	33.0222	35.8531	36.2053	37.1426	67.54	6.57153	12.2998	23.9786	46.1281	45.0526	68.8728	78.2928	81.171
70.34	15.6019	27.666	33.0104	35.8414	36.2053	37.1332	67.64	6.573	12.3123	24.0099	46.1757	45.1112	68.8923	78.2999	81.171
70.44	15.6019	27.666	33.0073	35.8297	36.1935	37.1262	67.74	6.58081	12.3286	24.0411	46.2264	45.1635	68.9165	78.3124	81.171
70.54	15.6066	27.6707	33.019	35.8265	36.1904	37.1309	67.84	6.60742	12.3669	24.077	46.3038	45.2316	68.9353	78.3312	81.1788
70.64	15.6168	27.6886	33.0175	35.8367	36.1888	37.1293	67.94	6.60742	12.3911	24.0997	46.3741	45.2831	68.9548	78.3312	81.1788
70.74	15.6215	27.6824	33.0143	35.8218	36.1888	37.1262	68.04	6.61914	12.3982	24.1427	46.4406	45.3456	68.9744	78.339	81.1757
70.84	15.6152	27.6746	33.0143	35.8187	36.1756	37.1231	68.14	6.62695	12.4177	24.17	46.4984	45.4042	68.9939	78.3461	81.171
70.94	15.6058	27.6699	33.0112	35.8023	36.1662	37.1184	68.24	6.64185	12.4326	24.2045	46.5531	45.4581	69.0283	78.3422	81.1742
71.04	15.6042	27.6683	32.9932	35.7945	36.1537	37.102	68.34	6.65356	12.4568	24.2435	46.6053	45.5299	69.0525	78.3585	81.1906
71.14	15.6066	27.6675	32.9878	35.7875	36.1396	37.0997	68.44	6.65894	12.4763	24.2794	46.6593	45.5643	69.0688	78.3663	81.1906
71.24	15.6105	27.6699	32.9831	35.7867	36.1467	37.0989	68.54	6.66602	12.4958	24.3231	46.7264	45.6393	69.0806	78.371	81.1906
71.34	15.6089	27.673	32.9862	35.7781	36.1498	37.102	68.64	6.66602	12.5037	24.3771	46.7726	45.6932	69.0908	78.3781	81.1788
71.44	15.5902	27.666	32.9714	35.7593	36.131	37.0833	68.74	6.67383	12.5264	24.4083	46.8297	45.7426	69.0994	78.389	81.1937
71.54	15.6019	27.666	32.9597	35.7546	36.131	37.0833	68.84	6.67773	12.5317	24.4349	46.8702	45.8026	69.1182	78.3827	81.1906
71.64	15.6019	27.666	32.9597	35.7593	36.1232	37.0833	68.94	6.7019	12.5513	24.4716	46.9139	45.8463	69.1274	78.3944	81.203
71.74	15.5988	27.6707	32.9448	35.7445	36.1084	37.0723	69.04	6.70508	12.5708	24.5114	46.9647	45.8971	69.1587	78.4022	81.1998
71.84	15.5941	27.6699	32.9487	35.7515	36.1076	37.0793	69.14	6.7168	12.5928	24.5411	47.0194	45.9581	69.1736	78.4047	81.2023
71.94	15.6058	27.6699	32.944	35.7437	36.1076	37.0676	69.24	6.72852	12.6084	24.5787	47.0648	45.9972	69.208	78.4171	81.2008
72.04	15.6089	27.673	32.9471	35.7351	36.099	37.0707	69.34	6.73169	12.6326	24.6075	47.1156	46.0455	69.229	78.4242	81.1984
72.14	15.6136	27.6777	32.9323	35.732	36.0959	37.0801	69.44	6.72925	12.6458	24.6466	47.1639	46.0963	69.2485	78.4296	81.2147
72.24	15.6105	27.6746	32.9292	35.7172	36.0928	37.0715	69.54	6.75903	12.6663	24.681	47.225	46.1456	69.2737	78.4515	81.225
72.34	15.6058	27.6581	32.9167	35.7125	36.0764	37.0481	69.64	6.76367	12.6833	24.7169	47.257	46.2128	69.283	78.4562	81.2296
72.44	15.6058	27.6581	32.9167	35.7007	36.0764	37.0481	69.74	6.7832	12.6997	24.7606	47.3077	46.2565	69.3071	78.4725	81.2343
72.54	15.6058	27.6581	32.905	35.6898	36.0764	37.0481	69.84	6.77539	12.7139	24.788	47.339	46.287	69.3181	78.4718	81.2382
72.64	15.6254	27.6699	32.9167	35.6968	36.0803	37.0481	69.94	6.79175	12.7114	24.8224	47.3898	46.3065	69.3376	78.475	81.2335
72.74	15.6254	27.6816	32.9167	35.6882	36.0803	37.0403	70.04	6.79736	12.7295	24.8568	47.4406	46.3683	69.3557	78.4828	81.2367
72.84	15.6207	27.6769	32.9003	35.6804	36.0638	37.0239	70.14	6.80664	12.7412	24.8959	47.4913	46.3995	69.3611	78.4952	81.2413
72.94	15.6183	27.6746	32.8979	35.6781	36.0615	37.0215	70.24	6.8042	12.7434	24.9059	47.535	46.4362	69.3704	78.485	81.2296
73.04	15.6207	27.6769	32.8925	35.6687	36.0521	37.0161	70.34	6.81836	12.7654	24.9513	47.6007	46.4791	69.3845	78.4991	81.2296
73.14	15.6136	27.6613	32.8854	35.6617	36.0373	37.009	70.44	6.82617	12.7803	24.9904	47.6469	46.5135	69.4041	78.507	81.2413
73.24	15.6089	27.6628	32.8854	35.6539	36.0209	37.009	70.54	6.82617	12.7927	25.0294	47.6906	46.5643	69.4236	78.507	81.2413
73.34	15.6066	27.6628	32.8815	35.6469	36.0186	37.0137	70.64	6.83789	12.8162	25.056	47.7296	46.6105	69.4353	78.5187	81.2367
73.44	15.6285	27.6761	32.8885	35.657	36.0178	37.0121	70.74	6.84424	12.8467	25.088	47.7914	46.6534	69.458	78.5219	81.2374
73.54	15.6262	27.6785	32.8862	35.6469	35.999	37.0098	70.84	6.86279	12.8677	25.1271	47.8483	46.694	69.4868	78.5389	81.2616
73.64	15.6332	27.6855	32.8815	35.639	36.006	37.0168	70.94	6.88403	12.8911	25.1583	47.9015	46.7604	69.5134	78.5577	81.264
73.74	15.6332	27.6855	32.8815	35.6257	36.0092	37.009	71.04	6.88477	12.9014	25.1896	47.9406	46.7784	69.533	78.5695	81.257
73.84	15.6332	27.6777	32.8784	35.6273	36.0029	36.9973	71.14	6.89331	12.9106	25.2137	47.996	46.819	69.5369	78.5741	81.2538
73.94	15.6332	27.6777	32.8854	35.6148	35.9865	37.002	71.24	6.9082	12.9373	25.2606	48.0656	46.8573	69.5564	78.5883	81.2726
74.04	15.6332	27.6777	32.8737	35.6148	35.9865	37.009	71.34	6.91138	12.9482	25.2748	48.0961	46.9073	69.5596	78.5804	81.264
74.14	15.6332	27.666	32.8737	35.6031	35.9865	37.0012	71.44	6.92383	12.9841	25.3107	48.1469	46.951	69.5688	78.5968	81.2687
74.24	15.6449	27.6777	32.8807	35.6101	35.9904	37.0012	71.54	6.93701	13.0037	25.3497	48.203	47.0065	69.5806	78.6061	81.2733
74.34	15.6402	27.673	32.869	35.5984	35.974	36.9965	71.64	6.94727	13.0154	25.381	48.2609	47.0416	69.6072	78.6202	81.2804
74.44	15.6379	27.6777	32.8511	35.5914	35.967	36.9895	71.74	6.95898	13.0349	25.4005	48.3116	47.0878	69.6267	78.6202	81.2804
74.54	15.6254	27.666	32.8347	35.5836	35.967	36.9778	71.84	6.94263	13.0278	25.4279	48.339	47.1229	69.6345	78.6202	81.2655
74.64	15.6254	27.666	32.8347	35.5765	35.9553	36.97	71.94	6.95044	13.0576	25.4623	48.3812	47.1644	69.6494	78.6266	81.2758
74.74	15.6332	27.6738	32.8425	35.5914	35.9584	36.9809	72.04	6.96289	13.0693	25.495	48.4366	47.201	69.6736	78.6359	81.2804
74.84	15.6254	27.6707	32.8276	35.5883	35.9404	36.9708	72.14	6.97925	13.0833	25.5223	48.4999	47.2643	69.6814	78.6451	81.285
74.94	15.6332	27.6902	32.8347	35.5953	35.9553	36.9778	72.24	6.98633	13.1091	25.556	48.5468	47.2948	69.6931	78.6515	81.2797
75.04	15.6332	27.6972	32.8347	35.5836	35.9435	36.9778	72.34	6.99487	13.1169	25.5802	48.5929	47.326	69.7126	78.6469	81.2726
75.14	15.6332	27.6972	32.8229	35.5836	35.9435	36.9661	72.44	6.99023	13.1318	25.5997	48.6469	47.3605	69.7361	78.6476	81.2772
75.24	15.6332	27.6925	32.8229	35.5836	35.9435	36.9661	72.54	7.00977	13.1443	25.6193	48.6906	47.4042	69.7439	78.6593	81.2921
75.34	15.6402	27.6894	32.83	35.5789	35.9427	36.9731	72.64	7.01758	13.1528	25.6576	48.7413	47.4432	69.7634	78.6639	81.2797
75.44	15.6348	27.6894	32.8198	35.5687	35.9256	36.963	72.74	7.03564	13.1709	25.681	48.7953	47.494	69.7783	78.6742	81.2836
75.54	15.6371	27.6941	32.8268	35.5757	35.9279	36.9583	72.84	7.03003	13.1787	25.7052	48.8241	47.5214	69.7908	78.6742	81.2765
75.64	15.6371	27.7011	32.8151	35.5757	35.9279	36.9583	72.94	7.03711	13.1912	25.7333	48.8585	47.5721	69.8025	78.6749	81.2765
75.74	15.6402	27.7042	32.8182	35.5671	35.931	36.9496	73.04	7.04492	13.2029	25.756	48.9093	47.6112	69.8103	78.6866	81.2765
75.84	15.6332	27.6972	32.8112	35.5632	35.9162	36.9348	73.14	7.05664	13.2224	25.7872	48.9554	47.662	69.8267	78.6945	81.2733
75.94	15.6379	27.7019	32.8081	35.5617	35.9092	36.9395	73.24	7.06909	13.2466	25.8309	49.0116	47.701	69.8416	78.6945	81.2733
76.04	15.6472	27.7159	32.8104	35.5593	35.9185	36.9536	73.34	7.07153	13.2732	25.8888	49.0648	47.7518	69.8579	78.7062	81.2804
76.14	15.6332	27.6972	32.8034	35.5476	35.8928	36.9395	73.44	7.07617	13.2927	25.9154	49.0936	47.7792	69.8682	78.7257	81.2804
76.24	15.6332	27.6972	32.8034	35.5523	35.8928	36.9418	73.54	7.08398	13.3123	25.9474	49.1281	47.8268	69.8728	78.7225	81.2804
76.34	15.6332	27.6972	32.7956	35.5375	35.8928	36.9317	73.64	7.0957	13.3357	25.9833	49.1906	47.8729	69.8923	78.7374	81.2758
76.44	15.6332	27.6925	32.7839	35.5328	35.8849	36.927	73.74	7.10278	13.3552	26.0099	49.2296	47.912	69.9119	78.7374	81.2687
76.54	15.6449	27.6972	32.7956	35.5328	35.8967	36.9387	73.84	7.10352	13.363	26.049	49.2836	47.955	69.9236	78.7491	81.2687
76.64	15.6449	27.6972	32.7839	35.5328	35.8849	36.9309	73.94	7.0957	13.3716	26.0724	49.3116	47.9894	69.9307	78.7445	81.2609
76.74	15.6449	27.6855	32.7839	35.525	35.8771	36.9192	74.04	7.1167	13.3911	26.1115	49.3522	48.0494	69.936	78.7538	81.2655
76.84	15.6285	27.6972	32.7761	35.525	35.8771	36.9114	74.14	7.11914	13.4216	26.1505	49.3937	48.0956	69.9666	78.7687	81.2726
76.94	15.641	27.7097	32.7792	35.5328	35.8701	36.9075	74.24	7.13403	13.428	26.1654	49.443	48.13	69.9775	78.7687	81.2804
77.04	15.6293	27.7167	32.7769	35.5164	35.8685	36.9075	74.34	7.13477	13.4333	26.2091	49.4874	48.1588	69.99	78.7687	81.2875
77.14	15.6527	27.7238	32.7909	35.5258	35.8849	36.9075	74.44	7.13477	13.4451	26.2528	49.5304	48.2128	70.0017	78.7765	81.2687
77.24	15.641	27.7214	32.7722	35.5328	35.8849	36.8997	74.54	7.14648	13.4724	26.2911	49.5663	48.2472	70.0095	78.7882	81.2687
77.34	15.641	27.7167	32.7722	35.525	35.8771	36.8997	74.64	7.1543	13.4912	26.3256	49.5961	48.2909	70.0212	78.7953	81.2804
77.44	15.641	27.7167	32.7769	35.525	35.8771	36.8879	74.74	7.16602	13.4888	26.338	49.6281	48.337	70.0408	78.796	81.2804
77.54	15.6488	27.7245	32.7839	35.5281	35.8732	36.8911	74.84	7.17773	13.5037	26.3693	49.6788	48.3807	70.0571	78.8077	81.2804
77.64	15.6488	27.7245	32.7722	35.5093	35.8732	36.8926	74.94	7.18555	13.5107	26.392	49.7374	48.4393	70.0642	78.8156	81.2804
77.74	15.6488	27.7167	32.7722	35.5093	35.8654	36.8762	75.04	7.19019	13.5278	26.4325	49.7897	48.4752	70.0767	78.817	81.285
77.84	15.6457	27.7167	32.7722	35.5015	35.8654	36.8762	75.14	7.2168	13.5544	26.4669	49.8234	48.5214	70.0955	78.8312	81.2921
77.94	15.641	27.712	32.7643	35.5062	35.8537	36.8684	75.24	7.21997	13.574	26.5099	49.8969	48.5753	70.1182	78.8422	81.2921
78.04	15.641	27.705	32.7479	35.5085	35.8506	36.8684	75.34	7.22852	13.5857	26.5294	49.9281	48.608	70.115	78.8507	81.2843
78.14	15.641	27.705	32.7409	35.4945	35.8459	36.8684	75.44	7.23633	13.6052	26.5607	49.9718	48.6425	70.1345	78.8507	81.2843
78.24	15.6449	27.7167	32.7409	35.5132	35.8459	36.8684	75.54	7.24805	13.6287	26.5756	50.0109	48.6854	70.1541	78.8585	81.2843
78.34	15.6449	27.7167	32.7409	35.5054	35.8381	36.8715	75.64	7.24414	13.6248	26.5958	50.0531	48.6964	70.1494	78.8539	81.2726
78.44	15.6449	27.7167	32.7331	35.5054	35.8381	36.8684	75.74	7.25586	13.6443	26.6239	50.089	48.7401	70.1501	78.8468	81.2726
78.54	15.6449	27.7167	32.7214	35.4937	35.8264	36.8567	75.84	7.25586	13.6638	26.6505	50.1249	48.776	70.1587	78.8585	81.2804
78.64	15.6449	27.7167	32.7261	35.4937	35.8217	36.8567	75.94	7.27222	13.688	26.6825	50.1757	48.8268	70.1782	78.871	81.285
78.74	15.648	27.7167	32.7253	35.489	35.8264	36.8567	76.04	7.28711	13.7068	26.7357	50.2413	48.8651	70.197	78.8898	81.2875
78.84	15.641	27.705	32.7089	35.482	35.8264	36.845	76.14	7.29883	13.7334	26.7599	50.2804	48.88	70.2048	78.8976	81.2804
78.94	15.6488	27.7128	32.7097	35.4898	35.8342	36.8497	76.24	7.30664	13.7458	26.7958	50.3312	48.912	70.2197	78.8976	81.2875
79.04	15.6488	27.7128	32.7097	35.4898	35.8224	36.8567	76.34	7.31836	13.7622	26.8302	50.382	48.9432	70.229	78.8976	81.2804
79.14	15.6488	27.7097	32.7018	35.4781	35.8146	36.8567	76.44	7.31836	13.7771	26.8732	50.421	48.9745	70.2393	78.9093	81.2804
79.24	15.6488	27.705	32.6901	35.4703	35.8146	36.845	76.54	7.31372	13.792	26.8881	50.4476	49.0135	70.2439	78.9061	81.2804
79.34	15.6488	27.705	32.6901	35.475	35.8029	36.845	76.64	7.31445	13.7966	26.9083	50.4796	49.0526	70.2634	78.9015	81.2804
79.44	15.6457	27.705	32.6823	35.482	35.8029	36.8372	76.74	7.32935	13.8193	26.9427	50.5336	49.0948	70.283	78.9125	81.2804
79.54	15.648	27.705	32.6792	35.4703	35.7834	36.8403	76.84	7.32227	13.8169	26.9716	50.5546	49.1307	70.283	78.9171	81.2687
79.64	15.641	27.705	32.6628	35.4625	35.7834	36.8333	76.94	7.34326	13.8403	27.0223	50.5936	49.1713	70.2908	78.9296	81.2733
79.74	15.641	27.705	32.6628	35.4625	35.7717	36.8254	77.04	7.3457	13.8552	27.0443	50.6398	49.2128	70.3025	78.932	81.2804
79.84	15.6527	27.712	32.6628	35.4742	35.7756	36.8254	77.14	7.35742	13.8748	27.0685	50.6788	49.2635	70.322	78.9366	81.2758
79.94	15.6527	27.705	32.6628	35.4625	35.7756	36.8254	77.24	7.36841	13.8896	27.1107	50.725	49.3058	70.3447	78.9398	81.2719
80.04	15.641	27.6972	32.6503	35.4625	35.7639	36.8254	77.34	7.37305	13.9138	27.1349	50.7765	49.3566	70.3689	78.9445	81.2765
80.14	15.6527	27.6972	32.6432	35.4547	35.7639	36.8137	77.44	7.39648	13.9451	27.1732	50.839	49.4003	70.3923	78.9757	81.285
80.24	15.6527	27.6925	32.6385	35.45	35.7592	36.809	77.54	7.4043	13.9646	27.1974	50.8851	49.444	70.4087	78.9757	81.2882
80.34	15.6527	27.6824	32.6245	35.4312	35.7443	36.7942	77.64	7.41602	13.9763	27.2365	50.9093	49.4777	70.4072	78.9828	81.2882
80.44	15.648	27.6777	32.6237	35.4312	35.7326	36.7942	77.74	7.42847	14.0005	27.2684	50.9413	49.526	70.4165	78.9803	81.2928
80.54	15.641	27.6777	32.6237	35.4234	35.7326	36.7825	77.84	7.44727	14.0225	27.3153	50.9991	49.5721	70.4431	78.9952	81.2999
80.64	15.641	27.6777	32.612	35.4234	35.7248	36.7747	77.94	7.46216	14.0271	27.338	51.035	49.6307	70.4548	78.9921	81.2953
80.74	15.6457	27.6777	32.612	35.4117	35.7248	36.7747	78.04	7.47461	14.0349	27.381	51.0687	49.6815	70.458	78.9991	81.2882
80.84	15.6527	27.6613	32.6042	35.4117	35.7178	36.7629	78.14	7.47925	14.0591	27.4247	51.1053	49.7252	70.4751	79.0038	81.2928
80.94	15.6574	27.6511	32.5894	35.3969	35.71	36.7598	78.24	7.50586	14.0779	27.4708	51.1515	49.7753	70.5024	79.0109	81.3116
81.04	15.6527	27.6464	32.5847	35.3922	35.7006	36.7473	78.34	7.50586	14.0974	27.4857	51.2023	49.8143	70.5173	79.0187	81.3085
81.14	15.6527	27.6464	32.5721	35.3843	35.6982	36.7473	78.44	7.52075	14.1201	27.5099	51.2445	49.8566	70.5283	79.0219	81.307
81.24	15.6527	27.6433	32.5534	35.3843	35.6974	36.7356	78.54	7.53857	14.1482	27.5575	51.2968	49.901	70.5486	79.0468	81.328
81.34	15.6527	27.6417	32.5534	35.3843	35.6974	36.7356	78.64	7.53247	14.1443	27.5638	51.3102	49.9159	70.5479	79.0453	81.3102
81.44	15.6527	27.6433	32.5417	35.3726	35.6974	36.7278	78.74	7.55664	14.1677	27.6115	51.3585	49.9667	70.5806	79.0616	81.3195
81.54	15.6527	27.6386	32.5339	35.3726	35.6857	36.7161	78.84	7.552	14.1826	27.6381	51.4093	50.0089	70.5759	79.0695	81.3163
81.64	15.648	27.6339	32.5292	35.3601	35.6732	36.7114	78.94	7.56836	14.1833	27.6583	51.4288	50.0299	70.5955	79.0648	81.3234
81.74	15.6332	27.6269	32.5104	35.3531	35.6662	36.6926	79.04	7.57617	14.2114	27.6896	51.4679	50.0597	70.6072	79.0695	81.3234
81.84	15.6332	27.6191	32.5104	35.3414	35.6545	36.6895	79.14	7.58789	14.2185	27.7208	51.5187	50.1002	70.6267	79.0741	81.3187
81.94	15.6379	27.6238	32.5073	35.3461	35.6592	36.7012	79.24	7.5957	14.2263	27.745	51.5499	50.13	70.6299	79.0695	81.3116
82.04	15.6402	27.6292	32.4979	35.3406	35.6615	36.6989	79.34	7.61206	14.2458	27.7762	51.5936	50.1705	70.647	79.0858	81.3163
82.14	15.6332	27.6199	32.4909	35.3218	35.6545	36.6778	79.44	7.62695	14.2576	27.8177	51.6561	50.2167	70.6658	79.0929	81.3187
82.24	15.6379	27.6191	32.4878	35.3218	35.6467	36.677	79.54	7.64648	14.2935	27.8497	51.7054	50.2518	70.6931	79.1085	81.3312
82.34	15.6402	27.6191	32.4784	35.3101	35.6349	36.677	79.64	7.66138	14.3115	27.8888	51.7523	50.298	70.7126	79.1117	81.3344
82.44	15.6379	27.6191	32.4597	35.3023	35.6349	36.677	79.74	7.67383	14.3311	27.92	51.7928	50.33	70.7244	79.1281	81.3273
82.54	15.6449	27.6191	32.4518	35.3023	35.6349	36.6653	79.84	7.67065	14.3318	27.9349	51.8226	50.3566	70.7244	79.1281	81.3241
82.64	15.6332	27.6027	32.4401	35.2789	35.6154	36.6536	79.94	7.67773	14.3435	27.9591	51.8632	50.3807	70.7393	79.1234	81.3312
82.74	15.6332	27.5839	32.4284	35.2711	35.6037	36.6536	80.04	7.68555	14.3584	27.9865	51.8898	50.4081	70.7439	79.1241	81.3265
82.84	15.6332	27.6003	32.4284	35.2711	35.599	36.6458	80.14	7.70898	14.3826	28.0248	51.9523	50.451	70.7751	79.1476	81.328
82.94	15.6332	27.5878	32.4175	35.2679	35.5936	36.6309	80.24	7.70898	14.3911	28.0568	51.9913	50.4823	70.7798	79.1476	81.3312
83.04	15.6332	27.5808	32.4128	35.2515	35.5795	36.6215	80.34	7.7168	14.406	28.0731	52.0226	50.5182	70.7869	79.1593	81.3312
83.14	15.6254	27.5753	32.3979	35.2437	35.5646	36.6114	80.44	7.72388	14.4287	28.0997	52.0616	50.5526	70.79	79.1671	81.3312
83.24	15.6332	27.5761	32.4128	35.2437	35.5646	36.6137	80.54	7.7168	14.4529	28.1193	52.0961	50.6034	70.7947	79.1671	81.3265
83.34	15.6254	27.5683	32.3972	35.2242	35.5451	36.5919	80.64	7.73242	14.4802	28.1583	52.1359	50.6503	70.8057	79.1866	81.3436
83.44	15.6254	27.5683	32.3807	35.2242	35.5373	36.5989	80.74	7.74414	14.4998	28.1779	52.1639	50.6815	70.8103	79.1913	81.3461
83.54	15.6285	27.5636	32.369	35.2273	35.5404	36.5903	80.84	7.75586	14.5115	28.2123	52.2179	50.7206	70.822	79.182	81.339
83.64	15.6332	27.5683	32.362	35.2125	35.5334	36.5825	80.94	7.76294	14.5396	28.2482	52.2804	50.7831	70.8384	79.1984	81.3585
83.74	15.6332	27.5683	32.3503	35.2125	35.5334	36.5754	81.04	7.7605	14.5544	28.2872	52.3116	50.8143	70.8533	79.1937	81.3585
83.84	15.6183	27.5714	32.3503	35.2125	35.5334	36.5637	81.14	7.75586	14.574	28.3185	52.3344	50.8339	70.8533	79.1866	81.3585
83.94	15.6168	27.5644	32.3425	35.2007	35.5256	36.5637	81.24	7.77539	14.5889	28.338	52.3702	50.8683	70.865	79.1913	81.3553
84.04	15.6332	27.5691	32.3307	35.1929	35.5139	36.5637	81.34	7.77856	14.5981	28.3849	52.3976	50.9003	70.8806	79.1945	81.3702
84.14	15.6215	27.5683	32.3307	35.1929	35.5107	36.5559	81.44	7.78784	14.613	28.4161	52.4366	50.9276	70.8877	79.2062	81.3702
84.24	15.6332	27.5636	32.3276	35.1812	35.4982	36.5442	81.54	7.79492	14.6326	28.4474	52.4647	50.9589	70.8884	79.214	81.3656
84.34	15.6215	27.5566	32.3229	35.1617	35.4865	36.5442	81.64	7.7981	14.6521	28.4716	52.4874	50.9869	70.9001	79.2257	81.3585
84.44	15.6183	27.5566	32.3182	35.1617	35.4896	36.5364	81.74	7.80273	14.6716	28.4982	52.5304	51.0214	70.9119	79.2328	81.3663
84.54	15.6136	27.5566	32.3112	35.1539	35.4912	36.5247	81.84	7.823	14.7068	28.5411	52.5765	51.0643	70.9282	79.2374	81.3781
84.64	15.6019	27.5417	32.2917	35.1304	35.4631	36.5129	81.94	7.82617	14.7263	28.5685	52.6085	51.087	70.9353	79.2421	81.3749
84.74	15.6019	27.5253	32.2917	35.1304	35.4631	36.5012	82.04	7.83789	14.7505	28.5997	52.6412	51.1322	70.9478	79.2421	81.3866
84.84	15.6136	27.5253	32.28	35.1226	35.4553	36.4934	82.14	7.83398	14.7607	28.6075	52.6664	51.162	70.9548	79.2445	81.382
84.94	15.6136	27.5253	32.2722	35.1109	35.4506	36.4934	82.24	7.83716	14.7686	28.6302	52.6937	51.2081	70.958	79.2484	81.3734
85.04	15.6089	27.5253	32.2604	35.0992	35.4435	36.4903	82.34	7.85352	14.8005	28.6708	52.7374	51.2401	70.9626	79.2616	81.3781
85.14	15.6019	27.5253	32.2604	35.0992	35.4318	36.477	82.44	7.85815	14.8123	28.6927	52.7719	51.2714	70.9822	79.2523	81.3734
85.24	15.6019	27.5253	32.2487	35.0914	35.4318	36.4739	82.54	7.85352	14.8286	28.7169	52.796	51.2909	70.9893	79.2648	81.3781
85.34	15.6019	27.5136	32.2409	35.0797	35.4318	36.4739	82.64	7.86524	14.8271	28.7365	52.8319	51.3221	71.0017	79.2648	81.3781
85.44	15.6066	27.5183	32.2456	35.0844	35.4287	36.4669	82.74	7.88867	14.8599	28.7872	52.8702	51.3612	71.0212	79.2882	81.3898
85.54	15.6089	27.5206	32.2456	35.0914	35.424	36.4739	82.84	7.89185	14.8701	28.8068	52.9047	51.3925	71.033	79.296	81.3898
85.64	15.6097	27.5058	32.2479	35.0836	35.4162	36.4708	82.94	7.89648	14.8794	28.8334	52.9171	51.4315	71.0525	79.3046	81.3898
85.74	15.605	27.5011	32.2362	35.0624	35.4115	36.4536	83.04	7.9043	14.906	28.8544	52.9484	51.4628	71.0571	79.2999	81.3851
85.84	15.598	27.4941	32.2292	35.0484	35.3896	36.4348	83.14	7.91602	14.9185	28.8739	52.9811	51.5182	71.0688	79.3077	81.3827
85.94	15.5996	27.4988	32.2261	35.0453	35.3896	36.4395	83.24	7.92065	14.949	28.9083	53.0109	51.5643	71.0876	79.3077	81.3976
86.04	15.6089	27.5011	32.2284	35.0476	35.392	36.434	83.34	7.93555	14.9639	28.9349	53.0616	51.6034	71.0986	79.3195	81.3898
86.14	15.6066	27.4871	32.2144	35.0336	35.3779	36.42	83.44	7.94263	14.9646	28.9591	53.1007	51.6378	71.1118	79.3273	81.3944
86.24	15.6019	27.4941	32.2214	35.0406	35.3771	36.427	83.54	7.92066	14.9724	28.9833	53.1202	51.662	71.115	79.3109	81.3781
86.34	15.6058	27.4832	32.2136	35.0211	35.3646	36.4192	83.64	7.93555	15.0076	29.0099	53.1664	51.7128	71.1345	79.3273	81.4015
86.44	15.6058	27.4785	32.2057	35.0132	35.3576	36.3997	83.74	7.93555	14.999	29.0248	53.1866	51.7401	71.1345	79.3202	81.3898
86.54	15.6058	27.4816	32.194	35.0132	35.3459	36.3997	83.84	7.9458	15.0264	29.0717	53.2328	51.8058	71.1448	79.3304	81.4047
86.64	15.6011	27.4863	32.194	35.0101	35.3334	36.3997	83.94	7.95508	15.0396	29.0958	53.2765	51.8417	71.1619	79.3468	81.4093
86.74	15.5988	27.4832	32.194	34.9937	35.3264	36.3879	84.04	7.95508	15.0544	29.1239	53.3077	51.8807	71.1736	79.3468	81.4093
86.84	15.5894	27.4706	32.194	34.9859	35.3232	36.3801	84.14	7.95117	15.0505	29.1466	53.3468	51.9081	71.165	79.3351	81.3976
86.94	15.5793	27.4706	32.1823	34.9812	35.3068	36.3801	84.24	7.96753	15.0786	29.1708	53.3795	51.9408	71.1821	79.3546	81.3976
87.04	15.5746	27.4706	32.1823	34.9625	35.3068	36.3684	84.34	7.98242	15.0935	29.2123	53.4047	51.9855	71.2009	79.3546	81.3976
87.14	15.5746	27.4706	32.1792	34.9625	35.299	36.3684	84.44	7.98242	15.113	29.2482	53.4288	52.0182	71.1978	79.3663	81.3944
87.24	15.5777	27.4769	32.1729	34.9547	35.2904	36.3637	84.54	7.98633	15.1248	29.2762	53.4601	52.0402	71.1931	79.3553	81.3937
87.34	15.5824	27.4863	32.1792	34.9429	35.2904	36.3567	84.64	7.99561	15.1489	29.2911	53.496	52.0768	71.2095	79.3632	81.3983
87.44	15.5824	27.4863	32.1745	34.9382	35.2756	36.3489	84.74	8.01294	15.1709	29.3334	53.557	52.1261	71.2393	79.3734	81.4086
87.54	15.5894	27.4832	32.1581	34.9312	35.2756	36.3489	84.84	8.01367	15.1833	29.3693	53.5858	52.1503	71.2275	79.3781	81.4093
87.64	15.5707	27.4667	32.1315	34.9117	35.249	36.3254	84.94	8.02539	15.2029	29.4083	53.6156	52.1666	71.2322	79.3734	81.4093
87.74	15.5871	27.4832	32.1479	34.9281	35.249	36.3301	85.04	8.03247	15.21	29.4357	53.6398	52.1932	71.24	79.3741	81.4164
87.84	15.5941	27.4902	32.1432	34.9234	35.256	36.3372	85.14	8.02539	15.2029	29.4708	53.6827	52.2167	71.2407	79.3749	81.4015
87.94	15.5941	27.4902	32.1432	34.9187	35.2435	36.3293	85.24	8.03711	15.2231	29.5099	53.7101	52.244	71.2439	79.3781	81.4093
88.04	15.5902	27.4785	32.1315	34.9	35.2295	36.3176	85.34	8.03784	15.231	29.5419	53.7374	52.2682	71.2485	79.3781	81.399
88.14	15.5902	27.4667	32.1237	34.9	35.2248	36.3059	85.44	8.05347	15.2458	29.5802	53.7687	52.3143	71.2634	79.3781	81.4015
88.24	15.5871	27.462	32.119	34.8969	35.2201	36.3059	85.54	8.05981	15.2607	29.5983	53.7999	52.3488	71.2783	79.3929	81.4164
88.34	15.5824	27.455	32.1167	34.8922	35.2053	36.2981	85.64	8.07617	15.2849	29.6271	53.839	52.38	71.2979	79.3944	81.4164
88.44	15.5824	27.455	32.119	34.8922	35.2053	36.2864	85.74	8.07617	15.3044	29.6661	53.8702	52.4003	71.3025	79.3929	81.4093
88.54	15.5824	27.455	32.112	34.8804	35.1935	36.2864	85.84	8.08008	15.3115	29.6974	53.9015	52.4191	71.3025	79.3781	81.4093
88.64	15.5941	27.4667	32.1237	34.8796	35.2053	36.2903	85.94	8.08789	15.3208	29.7184	53.9406	52.4557	71.3188	79.3827	81.4139
88.74	15.5894	27.4589	32.1237	34.8726	35.1974	36.2786	86.04	8.0957	15.324	29.7286	53.9679	52.4628	71.3188	79.3851	81.4047
88.84	15.5941	27.4589	32.1206	34.8695	35.1857	36.2739	86.14	8.0957	15.3357	29.7599	54.0109	52.4987	71.3259	79.3859	81.4093
88.94	15.5988	27.4683	32.1206	34.8578	35.1904	36.2762	86.24	8.10742	15.3552	29.799	54.035	52.5331	71.3337	79.3859	81.4061
89.04	15.6058	27.4706	32.1159	34.857	35.1974	36.2786	86.34	8.10425	15.3716	29.8185	54.0734	52.5597	71.3408	79.4022	81.4015
89.14	15.6058	27.4628	32.1159	34.8523	35.1943	36.2708	86.44	8.1106	15.3655	29.8529	54.0922	52.5753	71.3252	79.4008	81.3883
89.24	15.6011	27.4628	32.1159	34.8336	35.1967	36.2708	86.54	8.11523	15.3872	29.8771	54.1398	52.6073	71.3494	79.4132	81.3859
89.34	15.605	27.4612	32.1112	34.8367	35.181	36.2739	86.64	8.11524	15.406	29.8817	54.1639	52.6322	71.3579	79.41	81.3827
89.44	15.6097	27.4589	32.1159	34.8304	35.1857	36.2621	86.74	8.13159	15.4255	29.9271	54.2023	52.6737	71.3696	79.4288	81.3983
89.54	15.6097	27.4519	32.1159	34.8257	35.174	36.2551	86.84	8.14575	15.4255	29.9474	54.2289	52.705	71.3767	79.4242	81.382
89.64	15.6066	27.4589	32.1042	34.821	35.174	36.2473	86.94	8.15112	15.4497	29.9918	54.2655	52.744	71.3845	79.4335	81.3866
89.74	15.6019	27.4589	32.0878	34.814	35.1662	36.2473	87.04	8.16138	15.4685	30.0248	54.2953	52.7863	71.3994	79.4406	81.3922
89.84	15.6019	27.462	32.0807	34.8023	35.1662	36.2356	87.14	8.17773	15.488	30.056	54.3358	52.8417	71.4158	79.4484	81.3898
89.94	15.6019	27.4636	32.0807	34.8023	35.1545	36.2356	87.24	8.19019	15.5122	30.0731	54.3671	52.8744	71.4236	79.453	81.3912
90.04	15.6019	27.4589	32.0729	34.7976	35.1545	36.2278	87.34	8.18872	15.5139	30.0912	54.4047	52.9073	71.415	79.4515	81.3851
90.14	15.6019	27.4542	32.0729	34.7906	35.1545	36.2278	87.44	8.20508	15.5232	30.1271	54.4406	52.9432	71.4282	79.4562	81.3969
90.24	15.6019	27.4566	32.0745	34.7844	35.1514	36.2208	87.54	8.21289	15.5544	30.1466	54.4796	52.9659	71.4314	79.4679	81.3898
90.34	15.5972	27.4612	32.0604	34.782	35.1389	36.2231	87.64	8.21997	15.574	30.1779	54.514	52.9901	71.4314	79.4633	81.3944
90.44	15.6066	27.4519	32.0581	34.7679	35.1318	36.213	87.74	8.2207	15.5818	30.2052	54.5382	53.0245	71.4385	79.4608	81.3851
90.54	15.6019	27.4394	32.0534	34.7585	35.1193	36.2083	87.84	8.22461	15.5857	30.2169	54.5695	53.0526	71.4314	79.4484	81.3702
90.64	15.6136	27.4511	32.0573	34.7632	35.1342	36.2083	87.94	8.20972	15.5889	30.2482	54.5773	53.0846	71.4282	79.4437	81.3702
90.74	15.6019	27.4441	32.0456	34.7515	35.1123	36.1965	88.04	8.22461	15.6013	30.2872	54.6039	53.1066	71.4236	79.4366	81.3702
90.84	15.5988	27.4511	32.0456	34.7398	35.1076	36.1965	88.14	8.22461	15.6255	30.3114	54.6327	53.1517	71.4478	79.4491	81.3702
90.94	15.5972	27.4542	32.037	34.7429	35.1107	36.1996	88.24	8.23633	15.6333	30.3497	54.6561	53.173	71.4541	79.4679	81.3624
91.04	15.6019	27.4472	32.0417	34.7398	35.1107	36.1926	88.34	8.22144	15.6396	30.3771	54.671	53.1705	71.4626	79.453	81.3553
91.14	15.6019	27.4472	32.0417	34.7398	35.092	36.1817	88.44	8.23877	15.656	30.4232	54.7172	53.2152	71.4775	79.475	81.361
91.24	15.6066	27.4519	32.0386	34.7328	35.0967	36.17	88.54	8.22925	15.6802	30.4403	54.7343	53.2057	71.4868	79.4562	81.3483
91.34	15.6136	27.4589	32.0339	34.7398	35.0959	36.177	88.64	8.23316	15.7139	30.4637	54.7601	53.2362	71.5056	79.453	81.3429
91.44	15.6011	27.4417	32.0214	34.7195	35.0717	36.1567	88.74	8.24805	15.731	30.4857	54.785	53.2518	71.5103	79.4633	81.3578
91.54	15.5988	27.4371	32.0112	34.7172	35.0615	36.1544	88.84	8.25977	15.7646	30.5216	54.8234	53.2753	71.5205	79.4843	81.3507
91.64	15.6058	27.4511	32.0065	34.7211	35.0685	36.1497	88.94	8.28711	15.7732	30.5372	54.8624	53.3026	71.5134	79.507	81.3507
91.74	15.5824	27.4394	31.9948	34.7047	35.0451	36.1379	89.04	8.302	15.8005	30.5568	54.8898	53.3495	71.5408	79.5297	81.3514
91.84	15.5855	27.4425	31.9979	34.696	35.0482	36.1411	89.14	8.32153	15.8389	30.6146	54.9235	53.3722	71.5635	79.5726	81.35
91.94	15.5902	27.4472	31.9909	34.7007	35.0451	36.1411	89.24	8.30347	15.8762	30.6044	54.9108	53.3729	71.5642	79.535	81.3163
92.04	15.5902	27.4472	31.9909	34.696	35.0334	36.134	89.34	8.34571	15.9138	30.6115	54.9406	53.3846	71.5884	79.5265	81.3234
92.14	15.5949	27.4519	31.9878	34.6937	35.0381	36.1387	89.44	8.39257	15.9365	30.6544	55.0148	53.4276	71.5798	79.5297	81.3468
92.24	15.6019	27.4589	31.9948	34.7007	35.0373	36.1379	89.54	8.42066	15.9575	30.7091	55.1014	53.526	71.6157	79.5436	81.3898
92.34	15.6019	27.4589	31.9831	34.6929	35.0256	36.1262	89.64	8.45508	15.9834	30.7286	55.1664	53.5721	71.6182	79.6	81.3898
92.44	15.6019	27.462	31.9831	34.6929	35.0256	36.1262	89.74	8.49804	16.0481	30.7723	55.1788	53.4393	71.6235	79.6139	81.3234
92.54	15.6019	27.455	31.9753	34.6812	35.0256	36.1145	89.84	8.63245	16.045	30.7576	55.1772	53.2229	71.64	79.7328	81.4242
92.64	15.5972	27.455	31.9753	34.6812	35.0139	36.1145	89.94	8.61364	16.267	30.838	55.3054	53.7666	71.6743	79.7546	81.6359
92.74	15.5949	27.4519	31.9589	34.6664	35.0186	36.1036	90.04	8.73548	16.0974	31.1051	55.3834	54.026	71.647	80.3663	82.8062
92.84	15.6003	27.4503	31.955	34.6648	35.0209	36.0903	90.14	8.4176	16.2037	30.9521	55.3906	53.8605	72.1541	81.3914	85.5547
92.94	15.598	27.455	31.9518	34.6617	35.0256	36.095	90.24	8.65589	16.4788	31.6115	56.1696	54.9393	73.0807	82.9844	88.671
93.04	15.6097	27.4472	31.9448	34.6617	35.0256	36.0872	90.34	8.59728	16.3943	31.631	56.1483	54.5448	73.4712	82.9335	88.4374
93.14	15.598	27.4472	31.9518	34.6617	35.0256	36.0872	90.44	8.48475	16.3098	31.3481	56.1663	54.5081	73.1681	82.828	88.046
93.24	15.6074	27.4519	31.9565	34.6547	35.0186	36.0801	90.54	8.63318	16.3708	31.4856	56.26	54.5604	73.286	82.9171	87.6499
93.34	15.6215	27.4472	31.9518	34.6531	35.0139	36.0754	90.64	8.52466	16.2498	31.2911	56.207	54.4675	73.1119	82.6094	87.3601
93.44	15.6097	27.4472	31.9401	34.6547	35.0013	36.0676	90.74	8.46838	16.2263	31.4373	56.1991	54.4706	73.0931	82.3976	87.1414
93.54	15.6097	27.4472	31.9323	34.6422	35.0021	36.0676	90.84	8.58325	16.2849	31.5092	56.2086	54.5128	73.069	82.4398	87.0804
93.64	15.6097	27.4472	31.9323	34.6422	34.9943	36.0559	90.94	8.58325	16.3552	31.556	56.1835	54.4362	73.0049	82.3788	86.8749
93.74	15.6019	27.4308	31.9081	34.6375	34.9865	36.0317	91.04	8.54565	16.3279	31.4943	56.1366	54.412	72.9282	82.2413	86.6476
93.84	15.6019	27.4355	31.8932	34.6304	34.9865	36.0168	91.14	8.51294	16.2834	31.4552	56.1071	54.405	72.8806	82.0883	86.4414
93.94	15.6019	27.4355	31.8815	34.6304	34.9865	36.0168	91.24	8.53711	16.2942	31.5028	56.103	54.412	72.8267	81.985	86.3124
94.04	15.5941	27.4355	31.8815	34.6226	34.9865	36.0051	91.34	8.56836	16.3162	31.5099	56.0992	54.4042	72.7705	81.8468	86.1429
94.14	15.5988	27.4402	31.8784	34.6273	34.9912	36.0145	91.44	8.573	16.3286	31.5223	56.0748	54.3783	72.6954	81.7233	85.9897
94.24	15.5941	27.4277	31.862	34.6226	34.9701	36.009	91.54	8.55274	16.3279	31.5333	56.0773	54.3651	72.6299	81.5968	85.8273
94.34	15.5941	27.4277	31.862	34.6109	34.9631	36.009	91.64	8.53247	16.3232	31.5365	56.0499	54.3324	72.5603	81.4594	85.6788
94.44	15.5941	27.4277	31.8542	34.6109	34.96	35.9973	91.74	8.5293	16.2966	31.5201	56.0187	54.2831	72.4783	81.3156	85.5109
94.54	15.5941	27.4277	31.8425	34.6109	34.9584	35.9973	91.84	8.52539	16.2764	31.5037	55.996	54.2252	72.376	81.1796	85.3468
94.64	15.5941	27.4324	31.8425	34.6031	34.9521	35.9895	91.94	8.55664	16.2896	31.5568	55.9796	54.2159	72.3345	81.0812	85.1991
94.74	15.5824	27.423	31.8307	34.5914	34.9506	35.9778	92.04	8.55664	16.2927	31.5763	55.9874	54.2104	72.2759	80.9686	85.0897
94.84	15.5941	27.4324	31.8347	34.6031	34.9521	35.9895	92.14	8.55982	16.3044	31.5717	55.9484	54.1847	72.2041	80.8507	84.9476
94.94	15.5941	27.4347	31.8229	34.6031	34.9506	35.9817	92.24	8.57617	16.3123	31.566	55.9093	54.1713	72.1321	80.7186	84.8007
95.04	15.5824	27.4081	31.8112	34.5914	34.9404	35.9583	92.34	8.56445	16.3123	31.5717	55.8781	54.141	72.0361	80.6	84.6437
95.14	15.5824	27.4128	31.8034	34.5914	34.9357	35.9536	92.44	8.5542	16.3169	31.5614	55.8468	54.1041	71.9719	80.4686	84.5084
95.24	15.5824	27.4199	31.8034	34.5797	34.9357	35.9348	92.54	8.56372	16.3279	31.5802	55.8328	54.0885	71.8994	80.3436	84.3624
95.34	15.5824	27.4199	31.7917	34.5797	34.9279	35.9395	92.64	8.552	16.3193	31.5638	55.8102	54.0753	71.7979	80.2062	84.1906
95.44	15.5746	27.4199	31.7917	34.5797	34.9279	35.9465	92.74	8.57763	16.3333	31.5927	55.7897	54.0736	71.7368	80.1132	84.0421
95.54	15.5746	27.4199	31.7808	34.5718	34.9279	35.9387	92.84	8.59497	16.3459	31.5997	55.7679	54.0629	71.6814	80.0094	83.9015
95.64	15.5746	27.4081	31.7643	34.5718	34.9162	35.927	92.94	8.58789	16.3599	31.6122	55.7374	54.062	71.6033	79.8757	83.7374
95.74	15.5863	27.4152	31.7761	34.5836	34.9279	35.9309	93.04	8.59424	16.3701	31.6178	55.6859	54.0363	71.5166	79.7555	83.5992
95.84	15.5816	27.4034	31.7635	34.5757	34.9232	35.9262	93.14	8.58081	16.3506	31.6044	55.6171	53.9823	71.4236	79.6281	83.4257
95.94	15.5746	27.3847	31.7401	34.5671	34.9162	35.9075	93.24	8.59253	16.345	31.5997	55.6007	53.9432	71.343	79.4967	83.2609
96.04	15.5629	27.373	31.7097	34.557	34.9045	35.8958	93.34	8.57935	16.3435	31.5763	55.5577	53.8807	71.2595	79.4078	83.1133
96.14	15.5629	27.373	31.7097	34.5406	34.9045	35.8958	93.44	8.5957	16.3357	31.5717	55.5258	53.8495	71.1814	79.2811	82.9633
96.24	15.5629	27.3652	31.7018	34.5406	34.8881	35.8879	93.54	8.60352	16.3521	31.5778	55.4889	53.8314	71.1196	79.1764	82.8436
96.34	15.5582	27.3574	31.694	34.5359	34.8654	35.8684	93.64	8.61523	16.3499	31.5834	55.4867	53.7933	71.0432	79.0602	82.6788
96.44	15.5676	27.3699	31.6901	34.5484	34.8732	35.8762	93.74	8.62695	16.3403	31.5731	55.4523	53.7682	70.979	78.9288	82.5304
96.54	15.5629	27.3769	31.6901	34.5375	34.8732	35.8762	93.84	8.61206	16.3521	31.5685	55.4178	53.7323	70.8696	78.817	82.3749
96.64	15.5629	27.3769	31.687	34.5328	34.8732	35.8684	93.94	8.61523	16.3506	31.5685	55.4	53.701	70.79	78.6891	82.2086
96.74	15.566	27.3769	31.6745	34.5281	34.8615	35.8567	94.04	8.61377	16.3342	31.5553	55.3422	53.6488	70.6814	78.5492	82.0382
96.84	15.5707	27.3652	31.6745	34.5211	34.8615	35.8567	94.14	8.61206	16.3318	31.5497	55.3124	53.6237	70.5955	78.4413	81.9139
96.94	15.5707	27.3769	31.6628	34.5211	34.8615	35.845	94.24	8.60742	16.3325	31.5575	55.2889	53.5885	70.5056	78.3195	81.7726
97.04	15.5824	27.3769	31.6698	34.5179	34.8654	35.8489	94.34	8.60742	16.3357	31.549	55.2491	53.5643	70.4087	78.2062	81.6249
97.14	15.5777	27.3722	31.6581	34.5085	34.8607	35.8442	94.44	8.6145	16.3311	31.5514	55.2172	53.5448	70.3245	78.0577	81.4821
97.24	15.5707	27.3652	31.6511	34.5015	34.8537	35.8372	94.54	8.59253	16.3254	31.5341	55.153	53.5026	70.229	77.9257	81.3358
97.34	15.5676	27.3652	31.6385	34.5015	34.8584	35.8254	94.64	8.60034	16.3357	31.5223	55.132	53.4581	70.1345	77.7999	81.1757
97.44	15.5543	27.3652	31.6198	34.4937	34.8459	35.8254	94.74	8.60742	16.3279	31.5099	55.0929	53.4237	70.0493	77.6835	81.0304
97.54	15.5707	27.3683	31.6167	34.4937	34.8459	35.8254	94.84	8.6106	16.3162	31.4982	55.0375	53.3776	69.9548	77.5695	80.8929
97.64	15.5707	27.373	31.6003	34.482	34.8342	35.8254	94.94	8.62695	16.3279	31.4904	54.9913	53.3456	69.8799	77.4554	80.7726
97.74	15.5785	27.3808	31.6081	34.4898	34.842	35.8254	95.04	8.62231	16.3154	31.4708	54.9523	53.2902	69.7783	77.3344	80.6398
97.84	15.5785	27.373	31.6003	34.4898	34.8342	35.8254	95.14	8.60352	16.3083	31.4513	54.9132	53.2355	69.6814	77.2179	80.5109
97.94	15.5785	27.3777	31.6003	34.482	34.842	35.8137	95.24	8.60034	16.3052	31.4396	54.871	53.1979	69.5806	77.0936	80.3702
98.04	15.5754	27.38	31.5886	34.482	34.842	35.809	95.34	8.58789	16.2888	31.4318	54.8265	53.1542	69.4861	76.9796	80.2218
98.14	15.5707	27.373	31.5886	34.482	34.8342	35.802	95.44	8.60034	16.2998	31.4325	54.7999	53.108	69.4041	76.8781	80.1053
98.24	15.5707	27.3613	31.576	34.4703	34.8342	35.7942	95.54	8.60278	16.2881	31.4154	54.7531	53.0675	69.3096	76.7523	79.975
98.34	15.559	27.3613	31.5737	34.4703	34.8224	35.7942	95.64	8.5957	16.2927	31.4154	54.7054	53.0331	69.229	76.6476	79.8312
98.44	15.559	27.3613	31.576	34.4703	34.8224	35.7825	95.74	8.5957	16.2849	31.4083	54.6788	52.994	69.1345	76.5428	79.6835
98.54	15.559	27.3613	31.5573	34.4703	34.8224	35.7825	95.84	8.59888	16.2849	31.3888	54.6398	52.9432	69.0525	76.4288	79.5538
98.64	15.5707	27.3613	31.5573	34.4586	34.8107	35.7825	95.94	8.61523	16.2966	31.3934	54.6124	52.9073	68.9666	76.3116	79.4281
98.74	15.559	27.3582	31.5495	34.4507	34.8107	35.7825	96.04	8.61059	16.2881	31.3842	54.5844	52.8566	68.8877	76.2086	79.2953
98.84	15.5511	27.3488	31.5417	34.4265	34.7951	35.7629	96.14	8.60352	16.2732	31.3724	54.5428	52.8182	68.783	76.1046	79.1593
98.94	15.5511	27.3456	31.53	34.4195	34.7951	35.7551	96.24	8.61987	16.2849	31.3693	54.5304	52.776	68.7126	75.9952	79.035
99.04	15.5629	27.3456	31.5269	34.4195	34.7834	35.7551	96.34	8.63477	16.281	31.3654	54.4945	52.7401	68.6338	75.8859	78.9093
99.14	15.5511	27.3339	31.5222	34.4117	34.7756	35.7551	96.44	8.63159	16.2778	31.3427	54.4335	52.6862	68.5649	75.7545	78.7921
99.24	15.5511	27.3339	31.5222	34.4117	34.7756	35.7481	96.54	8.61524	16.2654	31.3263	54.4093	52.6425	68.4822	75.6476	78.6515
99.34	15.5511	27.3261	31.5143	34.4	34.7639	35.7551	96.64	8.62695	16.2771	31.3302	54.382	52.6151	68.4236	75.5616	78.5304
99.44	15.5464	27.3261	31.5096	34.4	34.7639	35.7473	96.74	8.62231	16.2607	31.306	54.3265	52.5597	68.3337	75.4359	78.3851
99.54	15.5394	27.323	31.4909	34.4	34.7592	35.7473	96.84	8.61987	16.2551	31.2919	54.285	52.5228	68.2563	75.3241	78.2733
99.64	15.5394	27.3066	31.4909	34.3922	34.7607	35.7356	96.94	8.62695	16.2498	31.2872	54.2413	52.4862	68.1782	75.2296	78.171
99.74	15.5394	27.3066	31.4909	34.3922	34.7474	35.7356	97.04	8.63477	16.2576	31.2872	54.2101	52.455	68.1345	75.1476	78.0499
99.84	15.5441	27.3113	31.4839	34.3969	34.7568	35.7403	97.14	8.63477	16.2458	31.2645	54.1561	52.4042	68.0447	75.0499	77.9335
99.94	15.5511	27.3183	31.4909	34.3922	34.7639	35.7395	97.24	8.64648	16.2529	31.2631	54.1241	52.3651	67.9861	74.9406	77.8187
100.04	15.5464	27.3136	31.4784	34.3875	34.7513	35.7348	97.34	8.64648	16.2458	31.2677	54.0812	52.3292	67.8962	74.839	77.6906
100.14	15.541	27.2996	31.4761	34.3851	34.749	35.7278	97.44	8.64648	16.2388	31.2599	54.0421	52.2831	67.8259	74.7445	77.5812
100.24	15.5511	27.3097	31.4878	34.3882	34.7639	35.7239	97.54	8.64648	16.238	31.2482	54.0031	52.244	67.7361	74.6593	77.4523
100.34	15.5511	27.3074	31.4714	34.3882	34.7521	35.7239	97.64	8.64966	16.2412	31.2435	53.9672	52.1964	67.6611	74.5609	77.3422
100.44	15.5464	27.3097	31.4714	34.3882	34.7521	35.7161	97.74	8.64648	16.2341	31.2365	53.9281	52.1698	67.5837	74.4562	77.2491
100.54	15.5394	27.2949	31.4714	34.3804	34.7404	35.7161	97.84	8.65112	16.2388	31.2294	53.8827	52.1354	67.5181	74.3593	77.1522
100.64	15.5316	27.287	31.4557	34.3726	34.7295	35.6965	97.94	8.64648	16.2295	31.2169	53.8273	52.08	67.4307	74.2616	77.0304
100.74	15.5363	27.2917	31.4557	34.3609	34.7217	35.6981	98.04	8.6582	16.231	31.2091	53.7921	52.0643	67.3533	74.1906	76.921
100.84	15.5402	27.287	31.4557	34.3609	34.7287	35.6887	98.14	8.63477	16.2263	31.202	53.7491	52.0214	67.2322	74.0577	76.7999
100.94	15.5355	27.287	31.4557	34.3609	34.717	35.6809	98.24	8.63477	16.2146	31.1974	53.7101	51.9706	67.1665	73.9484	76.7179
101.04	15.5386	27.2823	31.4471	34.3562	34.7123	35.684	98.34	8.65112	16.231	31.1942	53.6874	51.9557	67.1196	73.8632	76.6132
101.14	15.5433	27.287	31.4518	34.3609	34.717	35.6887	98.44	8.6582	16.2302	31.2013	53.6632	51.9237	67.0564	73.7804	76.5226
101.24	15.5386	27.287	31.4518	34.3609	34.7053	35.6887	98.54	8.65356	16.2334	31.1935	53.632	51.8893	66.9783	73.6742	76.3983
101.34	15.548	27.2886	31.4487	34.3656	34.7131	35.6887	98.64	8.64966	16.2295	31.192	53.5914	51.8605	66.8994	73.5804	76.307
101.44	15.5433	27.2823	31.4557	34.3726	34.7248	35.6817	98.74	8.6543	16.2341	31.1825	53.5499	51.8143	66.8259	73.4757	76.1906
101.54	15.5433	27.287	31.444	34.3609	34.717	35.6887	98.84	8.6543	16.2224	31.1779	53.507	51.7831	66.7588	73.3663	76.0812
101.64	15.5316	27.2722	31.4323	34.3492	34.7021	35.6692	98.94	8.65894	16.2271	31.1747	53.4843	51.7487	66.6782	73.2811	75.9764
101.74	15.5582	27.2823	31.4393	34.3609	34.7006	35.684	99.04	8.67773	16.2341	31.1818	53.4601	51.705	66.615	73.203	75.8937
101.84	15.5511	27.2753	31.4323	34.3562	34.6935	35.6606	99.14	8.66602	16.2263	31.17	53.4257	51.6737	66.5415	73.1039	75.7875
101.94	15.5558	27.2722	31.4253	34.3422	34.6982	35.6583	99.24	8.67383	16.2295	31.1732	53.3851	51.6378	66.4814	73.0343	75.6937
102.04	15.5582	27.2792	31.4323	34.3414	34.6974	35.6575	99.34	8.68091	16.2388	31.17	53.3507	51.6034	66.3962	72.9562	75.5812
102.14	15.5511	27.2745	31.4323	34.3297	34.6857	35.6575	99.44	8.68164	16.2419	31.1661	53.3273	51.5675	66.3337	72.8859	75.4796
102.24	15.5511	27.2558	31.4206	34.3297	34.6857	35.6458	99.54	8.69336	16.2412	31.1732	53.2999	51.526	66.2783	72.7882	75.3898
102.34	15.5511	27.2706	31.4237	34.3375	34.6771	35.6489	99.64	8.698	16.2388	31.1708	53.2687	51.4987	66.2251	72.7108	75.3046
102.44	15.5511	27.2605	31.4284	34.3328	34.6818	35.6536	99.74	8.70972	16.2458	31.1661	53.2296	51.4581	66.1736	72.6398	75.2218
102.54	15.5511	27.2558	31.4206	34.3179	34.6818	35.6458	99.84	8.7168	16.2341	31.1583	53.1984	51.412	66.115	72.5577	75.132
102.64	15.5558	27.2558	31.4253	34.3226	34.6787	35.6505	99.94	8.71216	16.2341	31.1466	53.171	51.3729	66.0298	72.4874	75.0258
102.74	15.5504	27.2402	31.4128	34.3101	34.6732	35.6497	100.04	8.70508	16.231	31.1388	53.1398	51.3339	65.9666	72.3976	74.921
102.84	15.5433	27.2402	31.4128	34.3101	34.6662	35.6379	100.14	8.7168	16.2334	31.1388	53.1124	51.3112	65.8916	72.2999	74.8429
102.94	15.5433	27.2433	31.4159	34.3054	34.6693	35.6379	100.24	8.72144	16.238	31.1388	53.0812	51.287	65.8228	72.2218	74.7382
103.04	15.5511	27.2433	31.4206	34.3101	34.6623	35.6379	100.34	8.73633	16.2341	31.1388	53.0546	51.244	65.7471	72.1281	74.632
103.14	15.5558	27.241	31.4175	34.3031	34.667	35.6309	100.44	8.73633	16.231	31.1271	53.0109	51.2081	65.6931	72.0428	74.5304
103.24	15.5582	27.2363	31.4245	34.3101	34.674	35.6332	100.54	8.72852	16.2263	31.1271	52.9835	51.1542	65.615	71.9554	74.4327
103.34	15.5511	27.2332	31.4128	34.3101	34.6662	35.6184	100.64	8.72388	16.2185	31.1075	52.9523	51.1229	65.533	71.8632	74.3312
103.44	15.5558	27.2332	31.4175	34.307	34.6709	35.6184	100.74	8.72778	16.2217	31.1107	52.9242	51.0753	65.4658	71.7836	74.2445
103.54	15.5511	27.2285	31.405	34.2906	34.6631	35.6067	100.84	8.73242	16.2146	31.1154	52.8929	51.0487	65.3806	71.6984	74.1281
103.64	15.5511	27.2238	31.405	34.2953	34.6584	35.6067	100.94	8.73242	16.2146	31.0958	52.8585	51.0214	65.3103	71.6085	74.0187
103.74	15.5511	27.205	31.405	34.2945	34.6467	35.5919	101.04	8.73242	16.2146	31.0841	52.8195	50.9901	65.24	71.5297	73.9171
103.84	15.548	27.2019	31.405	34.2898	34.6467	35.5872	101.14	8.73242	16.2146	31.0763	52.7882	50.9479	65.1619	71.4445	73.7999
103.94	15.5433	27.1972	31.3932	34.2711	34.6467	35.5872	101.24	8.73706	16.2192	31.0809	52.7616	50.9088	65.0962	71.371	73.6906
104.04	15.5464	27.2003	31.3964	34.2742	34.642	35.5825	101.34	8.73315	16.21	31.0685	52.7413	50.8729	65.0525	71.2882	73.5773
104.14	15.5511	27.205	31.4011	34.2789	34.642	35.5872	101.44	8.73169	16.2029	31.0568	52.6984	50.8339	65.0017	71.1866	73.4796
104.24	15.5511	27.205	31.4011	34.2672	34.6232	35.5872	101.54	8.73633	16.1951	31.049	52.671	50.8143	64.9478	71.0968	73.3898
104.34	15.5511	27.205	31.3893	34.2593	34.6232	35.5707	101.64	8.73633	16.1997	31.0372	52.6171	50.7635	64.8962	71.007	73.2999
104.44	15.5558	27.205	31.394	34.264	34.6279	35.5684	101.74	8.71362	16.199	31.0099	52.5734	50.7245	64.8181	70.9093	73.1906
104.54	15.5629	27.1972	31.3932	34.2711	34.6201	35.5754	101.84	8.71216	16.199	30.995	52.5538	50.6854	64.7478	70.8077	73.0897
104.64	15.5582	27.1972	31.3932	34.2711	34.6154	35.5676	101.94	8.72144	16.1919	30.9872	52.5194	50.651	64.6704	70.7147	72.9999
104.74	15.5511	27.1972	31.3932	34.2593	34.6029	35.5645	102.04	8.71362	16.1873	30.9708	52.4789	50.6105	64.5955	70.6249	72.9132
104.84	15.5433	27.1894	31.3737	34.2437	34.5881	35.552	102.14	8.70435	16.1826	30.9467	52.4281	50.5597	64.5237	70.5258	72.8187
104.94	15.5386	27.1847	31.3643	34.2273	34.5834	35.5473	102.24	8.7019	16.1802	30.9325	52.3912	50.5182	64.4673	70.4335	72.746
105.04	15.5332	27.1793	31.3472	34.2172	34.5764	35.5333	102.34	8.7207	16.1943	30.9467	52.3663	50.4979	64.4158	70.3656	72.6749
105.14	15.5238	27.1699	31.3425	34.2007	34.5529	35.5286	102.44	8.7207	16.1794	30.9396	52.3304	50.455	64.3572	70.2804	72.5851
105.24	15.5238	27.1699	31.3425	34.2007	34.5451	35.5286	102.54	8.7207	16.1794	30.9318	52.2726	50.4276	64.2869	70.2023	72.4952
105.34	15.5238	27.1699	31.3394	34.189	34.542	35.5168	102.64	8.7207	16.1841	30.92	52.2452	50.3917	64.2283	70.1398	72.4008
105.44	15.5191	27.1777	31.326	34.189	34.5373	35.5168	102.74	8.7207	16.1912	30.9169	52.1945	50.3502	64.158	70.0499	72.2921
105.54	15.5121	27.1699	31.3276	34.1812	34.5256	35.5043	102.84	8.72852	16.199	30.9154	52.1515	50.3339	64.0955	69.9874	72.2101
105.64	15.5035	27.1691	31.3174	34.1726	34.517	35.4887	102.94	8.72852	16.1873	30.8934	52.1124	50.2902	64.0251	69.9171	72.1366
105.74	15.5199	27.1777	31.3386	34.1742	34.5256	35.4934	103.04	8.73169	16.1873	30.9005	52.0812	50.2323	63.9712	69.8585	72.0538
105.84	15.5199	27.1855	31.3307	34.1695	34.5209	35.4934	103.14	8.72778	16.1904	30.8842	52.0453	50.1932	63.9189	69.7719	71.9703
105.94	15.5316	27.1808	31.3307	34.1617	34.5021	35.4856	103.24	8.72144	16.1919	30.8856	51.996	50.1588	63.8813	69.7147	71.8749
106.04	15.5199	27.1542	31.319	34.15	34.4904	35.4739	103.34	8.72852	16.1912	30.8732	51.964	50.1346	63.8298	69.6515	71.8038
106.14	15.5199	27.1542	31.3073	34.1382	34.4904	35.4739	103.44	8.72852	16.1912	30.8615	51.9327	50.0909	63.7791	69.5695	71.7335
106.24	15.5121	27.1511	31.2995	34.1304	34.4795	35.4543	103.54	8.72852	16.1912	30.8583	51.882	50.0643	63.697	69.4796	71.6437
106.34	15.5121	27.1581	31.2917	34.1226	34.467	35.4543	103.64	8.73169	16.1826	30.8522	51.8461	50.0253	63.6494	69.4047	71.5734
106.44	15.5121	27.1581	31.2917	34.1109	34.467	35.4465	103.74	8.73315	16.1873	30.8466	51.8116	49.9862	63.5759	69.3195	71.4913
106.54	15.5121	27.1581	31.2995	34.1109	34.467	35.4348	103.84	8.72461	16.1951	30.8497	51.7882	49.951	63.5134	69.2648	71.4288
106.64	15.5121	27.1581	31.2917	34.1031	34.4553	35.4348	103.94	8.72461	16.1951	30.8334	51.7609	49.9237	63.4626	69.1866	71.3624
106.74	15.5168	27.1581	31.28	34.0914	34.4553	35.4395	104.04	8.72144	16.1841	30.8153	51.7264	49.8776	63.4009	69.0819	71.2921
106.84	15.5191	27.1581	31.28	34.0797	34.4467	35.4387	104.14	8.7168	16.1794	30.799	51.6906	49.8456	63.3376	68.9874	71.2101
106.94	15.5121	27.1534	31.28	34.0718	34.4482	35.4387	104.24	8.7168	16.1794	30.7794	51.6469	49.8065	63.2751	68.9093	71.132
107.04	15.5121	27.1511	31.2651	34.075	34.4357	35.427	104.34	8.7168	16.1677	30.7794	51.6249	49.7635	63.1853	68.8273	71.0468
107.14	15.5121	27.1581	31.2604	34.0797	34.4357	35.427	104.44	8.71216	16.1677	30.7599	51.6007	49.744	63.115	68.746	70.9523
107.24	15.5121	27.1613	31.2526	34.0679	34.4357	35.427	104.54	8.70508	16.156	30.7599	51.5812	49.705	63.0564	68.671	70.8624
107.34	15.5004	27.1425	31.2409	34.0484	34.4123	35.3989	104.64	8.69409	16.156	30.7482	51.5304	49.6659	63.0056	68.5812	70.7875
107.44	15.4973	27.1511	31.2378	34.0453	34.4014	35.3809	104.74	8.70117	16.1677	30.7521	51.5031	49.6346	62.947	68.5109	70.714
107.54	15.4926	27.1464	31.2331	34.0375	34.3967	35.3762	104.84	8.70117	16.1553	30.7521	51.4835	49.5909	62.8962	68.4327	70.6241
107.64	15.5004	27.1464	31.2331	34.0211	34.3849	35.3762	104.94	8.70117	16.1482	30.7404	51.4523	49.5448	62.8376	68.3383	70.5421
107.74	15.4957	27.1464	31.2331	34.0211	34.3849	35.3762	105.04	8.67773	16.1365	30.7208	51.4015	49.5018	62.7673	68.2374	70.4523
107.84	15.4839	27.13	31.2167	34.0117	34.3724	35.3715	105.14	8.67774	16.1365	30.7091	51.3702	49.4745	62.7166	68.1788	70.3507
107.94	15.4808	27.1152	31.2018	33.982	34.3576	35.345	105.24	8.68481	16.1365	30.713	51.3429	49.4432	62.6611	68.1202	70.2679
108.04	15.4808	27.1152	31.2018	33.975	34.3459	35.3497	105.34	8.67773	16.1365	30.7013	51.3116	49.4042	62.5759	68.0616	70.1632
108.14	15.4886	27.123	31.1971	33.9898	34.3568	35.352	105.44	8.67773	16.1365	30.6935	51.2921	49.3729	62.5369	67.9601	70.0812
108.24	15.4746	27.1168	31.1792	33.9664	34.3428	35.334	105.54	8.66602	16.1248	30.67	51.2531	49.3221	62.4431	67.8781	69.9882
108.34	15.4761	27.1222	31.1823	33.9625	34.3459	35.3301	105.64	8.66284	16.1248	30.6537	51.2218	49.2948	62.3845	67.7999	69.8937
108.44	15.4808	27.1199	31.1823	33.9476	34.3459	35.3372	105.74	8.6582	16.1169	30.6434	51.2023	49.2518	62.3142	67.7374	69.8038
108.54	15.4808	27.1269	31.1823	33.9429	34.3342	35.3293	105.84	8.65356	16.1201	30.6373	51.1625	49.2159	62.2471	67.6476	69.725
108.64	15.4808	27.1269	31.1706	33.9312	34.3271	35.3293	105.94	8.6582	16.113	30.6317	51.1281	49.1815	62.1931	67.5773	69.6515
108.74	15.4644	27.1222	31.1659	33.9187	34.3217	35.3129	106.04	8.6582	16.113	30.6224	51.1007	49.1471	62.1423	67.5023	69.5616
108.84	15.4574	27.1269	31.1589	33.9117	34.3146	35.3059	106.14	8.6582	16.113	30.6154	51.0577	49.1112	62.0916	67.4249	69.4718
108.94	15.4574	27.1152	31.1558	33.9	34.3146	35.2981	106.24	8.64185	16.113	30.6075	51.0382	49.0721	62.0408	67.3468	69.3898
109.04	15.4543	27.1152	31.1464	33.9	34.3029	35.2864	106.34	8.63477	16.113	30.5958	51.0109	49.0331	61.9939	67.2687	69.2953
109.14	15.4418	27.1152	31.1511	33.9	34.2951	35.2864	106.44	8.63477	16.1052	30.5958	50.9679	48.9823	61.9478	67.1866	69.2179
109.24	15.4418	27.1152	31.1511	33.8804	34.2951	35.2864	106.54	8.63477	16.1052	30.588	50.9452	48.9432	61.8845	67.1163	69.1444
109.34	15.4371	27.1105	31.1432	33.8788	34.2787	35.2817	106.64	8.63477	16.0935	30.5809	50.9093	48.912	61.8533	67.046	69.0695
109.44	15.4301	27.1035	31.1315	33.8765	34.2639	35.2629	106.74	8.64648	16.1052	30.5834	50.882	48.8917	61.8064	66.975	69.0031
109.54	15.4301	27.1035	31.1198	33.8687	34.2639	35.2629	106.84	8.63013	16.0818	30.5568	50.8461	48.8221	61.7439	66.8859	68.9288
109.64	15.4301	27.1035	31.112	33.857	34.2521	35.2629	106.94	8.61133	16.074	30.545	50.8124	48.7955	61.6736	66.8319	68.8344
109.74	15.4418	27.1152	31.119	33.8687	34.2639	35.2668	107.04	8.61133	16.0708	30.5255	50.7999	48.7635	61.6228	66.7687	68.757
109.84	15.4418	27.1152	31.1003	33.8492	34.2592	35.2551	107.14	8.61133	16.0662	30.5223	50.7562	48.7323	61.5596	66.6984	68.6906
109.94	15.4418	27.1152	31.1003	33.8492	34.2404	35.2551	107.24	8.61133	16.0662	30.4982	50.7179	48.6932	61.4985	66.6359	68.6085
110.04	15.4418	27.1074	31.1003	33.8492	34.2404	35.2504	107.34	8.61133	16.0544	30.4865	50.6788	48.662	61.4353	66.5726	68.5304
110.14	15.4387	27.1074	31.0972	33.8344	34.2295	35.2403	107.44	8.61133	16.0544	30.4786	50.6476	48.6346	61.3604	66.507	68.4796
110.24	15.434	27.1074	31.0925	33.8297	34.2248	35.2356	107.54	8.61133	16.042	30.4669	50.6085	48.5839	61.2908	66.4249	68.3976
110.34	15.4418	27.1199	31.0972	33.8375	34.2256	35.2356	107.64	8.60352	16.0349	30.4545	50.5695	48.548	61.2322	66.3546	68.3241
110.44	15.4418	27.1152	31.0807	33.8297	34.2326	35.2239	107.74	8.60034	16.0232	30.4474	50.5382	48.4948	61.1768	66.3124	68.2413
110.54	15.4371	27.1105	31.076	33.825	34.2201	35.2192	107.84	8.5957	16.0232	30.4357	50.5109	48.4698	61.1111	66.2374	68.1906
110.64	15.4301	27.1035	31.0612	33.8179	34.2131	35.2122	107.94	8.5957	16.0232	30.4161	50.4796	48.4198	61.0525	66.1866	68.0844
110.74	15.4222	27.0956	31.0534	33.7984	34.1935	35.1926	108.04	8.59106	16.0232	30.4083	50.4406	48.3807	60.9985	66.1039	68.0187
110.84	15.4348	27.1003	31.0659	33.8109	34.2061	35.2051	108.14	8.58862	16.02	30.4012	50.4139	48.3463	60.936	66.0311	67.9335
110.94	15.4418	27.1074	31.0612	33.8101	34.2131	35.2043	108.24	8.59106	16.0107	30.392	50.3851	48.3097	60.8799	65.975	67.8578
111.04	15.4301	27.0956	31.0612	33.7984	34.2131	35.2043	108.34	8.60034	16.0232	30.3966	50.3585	48.2792	60.8416	65.9171	67.8077
111.14	15.4301	27.0956	31.0565	33.7984	34.2131	35.2043	108.44	8.58789	16.0154	30.3888	50.3265	48.2323	60.7705	65.8241	67.7296
111.24	15.4535	27.1074	31.0729	33.7992	34.2248	35.2043	108.54	8.58789	16.0154	30.3888	50.285	48.201	60.7126	65.7491	67.6515
111.34	15.4535	27.1074	31.0729	33.7945	34.217	35.2043	108.64	8.58789	16.0154	30.3771	50.2491	48.1737	60.6541	65.6742	67.5695
111.44	15.4566	27.1074	31.0612	33.7828	34.217	35.1965	108.74	8.57617	16.0122	30.3661	50.2218	48.1346	60.6033	65.6085	67.4945
111.54	15.4566	27.1144	31.0682	33.7898	34.224	35.2036	108.84	8.57617	16.0076	30.3497	50.1788	48.1034	60.5525	65.5187	67.4374
111.64	15.4496	27.1074	31.0612	33.7711	34.2053	35.1848	108.94	8.57153	16.0029	30.3419	50.1469	48.0839	60.4744	65.4484	67.3429
111.74	15.4496	27.1074	31.0534	33.7632	34.2053	35.1848	109.04	8.56445	15.9958	30.3302	50.1085	48.0526	60.4119	65.3781	67.2921
111.84	15.4496	27.1105	31.0534	33.7632	34.2084	35.1848	109.14	8.56128	15.9958	30.3224	50.0741	48.0331	60.3533	65.3195	67.2218
111.94	15.4418	27.1152	31.0503	33.7515	34.2053	35.1848	109.24	8.55664	15.9841	30.306	50.0453	47.994	60.2947	65.2491	67.171
112.04	15.4418	27.1152	31.0456	33.7546	34.2053	35.177	109.34	8.56128	15.981	30.3082	50.0038	47.9557	60.2454	65.1686	67.1053
112.14	15.4465	27.1199	31.0386	33.7562	34.1982	35.1817	109.44	8.56836	15.988	30.3107	49.9718	47.9237	60.1853	65.1007	67.0616
112.24	15.4418	27.1035	31.0339	33.7515	34.1904	35.1653	109.54	8.56372	15.988	30.3029	49.9374	47.9042	60.1072	65.0375	67.0031
112.34	15.4418	27.1035	31.0222	33.7398	34.1857	35.1653	109.64	8.55664	15.988	30.2911	49.8937	47.8651	60.0596	64.9601	66.9445
112.44	15.4387	27.1003	31.0222	33.7398	34.1888	35.1653	109.74	8.55981	15.9795	30.2701	49.8656	47.837	60.0088	64.9047	66.8922
112.54	15.434	27.0988	31.0175	33.7398	34.1787	35.1575	109.84	8.56909	15.9958	30.2677	49.8312	47.8221	59.9431	64.839	66.8507
112.64	15.434	27.1035	31.0026	33.7367	34.174	35.1458	109.94	8.56445	15.9678	30.2482	49.7999	47.7714	59.8494	64.7648	66.7765
112.74	15.434	27.1035	31.0026	33.732	34.174	35.1458	110.04	8.56445	15.9607	30.2365	49.7804	47.7369	59.8071	64.6984	66.7257
112.84	15.434	27.0956	30.9909	33.7242	34.1662	35.1458	110.14	8.55981	15.9575	30.2169	49.7374	47.701	59.7439	64.6117	66.6476
112.94	15.434	27.0956	30.9909	33.7242	34.1615	35.134	110.24	8.56201	15.9575	30.2184	49.7147	47.6737	59.6978	64.5389	66.6014
113.04	15.434	27.0956	30.9909	33.7125	34.1545	35.1309	110.34	8.57617	15.9646	30.2091	49.6788	47.6425	59.6541	64.507	66.535
113.14	15.4222	27.0925	30.9831	33.7125	34.1514	35.1215	110.44	8.57617	15.9646	30.2013	49.6515	47.6112	59.5986	64.4366	66.4718
113.24	15.4222	27.0878	30.9831	33.7047	34.1467	35.1262	110.54	8.57153	15.9568	30.1896	49.6124	47.5839	59.5642	64.3632	66.4132
113.34	15.4222	27.0878	30.9714	33.7	34.142	35.1145	110.64	8.55664	15.949	30.1818	49.5734	47.5448	59.5056	64.2726	66.3429
113.44	15.4144	27.0831	30.9714	33.6859	34.1349	35.1067	110.74	8.56836	15.9443	30.174	49.5343	47.5253	59.4744	64.2101	66.2843
113.54	15.4293	27.0878	30.9831	33.7047	34.1467	35.1184	110.84	8.55664	15.9255	30.1622	49.5031	47.4816	59.4236	64.1515	66.2218
113.64	15.434	27.0847	30.9722	33.7047	34.1467	35.1067	110.94	8.55664	15.9255	30.1544	49.4718	47.4432	59.365	64.1007	66.1437
113.74	15.4222	27.08	30.9557	33.6929	34.1318	35.1067	111.04	8.55664	15.9255	30.1427	49.4327	47.412	59.3188	64.0226	66.0851
113.84	15.4222	27.08	30.9557	33.6929	34.1271	35.1036	111.14	8.56836	15.9287	30.1342	49.3969	47.3878	59.2783	63.9633	66.0062
113.94	15.4105	27.0683	30.9315	33.6734	34.1107	35.0793	111.24	8.56836	15.9224	30.131	49.3702	47.358	59.2439	63.9093	65.9476
114.04	15.4222	27.0683	30.9362	33.6851	34.1154	35.0911	111.34	8.56128	15.9224	30.1239	49.3436	47.3221	59.1899	63.8585	65.8749
114.14	15.4105	27.0597	30.9159	33.6765	34.099	35.0707	111.44	8.55664	15.906	30.1115	49.3116	47.2877	59.1345	63.757	65.7999
114.24	15.4175	27.0644	30.9206	33.6765	34.1037	35.0754	111.54	8.55664	15.9014	30.0997	49.2726	47.2635	59.0759	63.703	65.7296
114.34	15.4105	27.0566	30.9089	33.6695	34.1006	35.0707	111.64	8.573	15.9106	30.1161	49.2577	47.244	59.0415	63.6561	65.6757
114.44	15.4105	27.0566	30.9089	33.6578	34.0912	35.0559	111.74	8.58008	15.9177	30.1185	49.2452	47.2167	58.9861	63.6124	65.6288
114.54	15.4105	27.0566	30.9011	33.6625	34.0842	35.0559	111.84	8.57227	15.9177	30.1115	49.214	47.1854	58.9229	63.5616	65.5656
114.64	15.4074	27.0535	30.8979	33.6664	34.0811	35.0411	111.94	8.57227	15.9099	30.1005	49.1827	47.1464	58.865	63.5226	65.4952
114.74	15.4144	27.0605	30.8932	33.6656	34.0717	35.0481	112.04	8.57544	15.9099	30.0873	49.1554	47.1119	58.7837	63.4718	65.4562
114.84	15.4144	27.0511	30.8885	33.664	34.0599	35.0317	112.14	8.58008	15.895	30.0802	49.1241	47.076	58.7314	63.4281	65.3812
114.94	15.4144	27.037	30.8737	33.6586	34.0529	35.0168	112.24	8.57153	15.8818	30.0638	49.0765	47.0284	58.6768	63.3539	65.3148
115.04	15.4027	27.0417	30.8737	33.6539	34.0529	35.0168	112.34	8.57617	15.8865	30.0685	49.0499	47.0018	58.6306	63.3156	65.2491
115.14	15.4027	27.0488	30.862	33.6422	34.0529	35.0051	112.44	8.58789	15.8982	30.0685	49.0226	46.994	58.5806	63.2687	65.1827
115.24	15.4074	27.0417	30.8667	33.6469	34.0467	35.0145	112.54	8.57617	15.8865	30.0458	48.9718	46.955	58.5134	63.2062	65.1085
115.34	15.4144	27.0488	30.8737	33.6539	34.049	35.0286	112.64	8.56909	15.8748	30.0341	48.9452	46.9283	58.479	63.16	65.0546
115.44	15.4144	27.0488	30.8737	33.6461	34.049	35.0208	112.74	8.57153	15.8701	30.0319	48.9164	46.8995	58.4307	63.1039	64.9867
115.54	15.4144	27.0441	30.8737	33.6461	34.0373	35.0208	112.84	8.56445	15.863	30.0177	48.882	46.8651	58.3845	63.0382	64.9015
115.64	15.4144	27.037	30.8737	33.6296	34.0373	35.009	112.94	8.56445	15.863	30.006	48.8507	46.8292	58.3337	62.9757	64.8046
115.74	15.4222	27.0323	30.869	33.6257	34.0404	35.0074	113.04	8.56592	15.8599	30.0028	48.8241	46.7955	58.3071	62.91	64.7382
115.84	15.4293	27.037	30.8667	33.6304	34.0451	35.0098	113.14	8.58325	15.8818	30.0052	48.8187	46.798	58.2776	62.8851	64.6781
115.94	15.4074	27.0222	30.8589	33.6125	34.0225	35.002	113.24	8.58008	15.8865	29.9982	48.7921	46.7831	58.2322	62.8273	64.6078
116.04	15.4058	27.0206	30.8573	33.5945	34.0092	34.9957	113.34	8.58008	15.8865	29.9982	48.7609	46.7518	58.1931	62.757	64.5109
116.14	15.4105	27.0222	30.862	33.5914	34.0139	34.9856	113.44	8.58008	15.8748	29.9904	48.7218	46.7128	58.1619	62.6984	64.4523
116.24	15.4105	27.0206	30.862	33.5914	33.9943	34.9739	113.54	8.58008	15.8748	29.9708	48.6906	46.6932	58.115	62.6476	64.4015
116.34	15.4105	27.0136	30.8495	33.5914	33.9943	34.9739	113.64	8.58789	15.8826	29.9716	48.671	46.6698	58.072	62.621	64.339
116.44	15.3918	27.0066	30.8237	33.5679	33.9709	34.9551	113.74	8.58472	15.8794	29.9637	48.6171	46.6393	58.0298	62.5499	64.2655
116.54	15.4105	27.0058	30.8307	33.5679	33.9709	34.9622	113.84	8.60278	15.8943	29.9708	48.6124	46.6229	58.0017	62.507	64.2101
116.64	15.3988	27.0089	30.8307	33.5601	33.9709	34.9622	113.94	8.5957	15.8865	29.9591	48.5695	46.5839	57.9626	62.4484	64.1398
116.74	15.4035	27.0066	30.8307	33.5648	33.9725	34.9669	114.04	8.5957	15.8865	29.9396	48.5499	46.5526	57.9119	62.4171	64.057
116.84	15.4105	27.0105	30.8307	33.5718	33.9748	34.9661	114.14	8.5957	15.8865	29.9318	48.5109	46.5214	57.865	62.3663	63.9725
116.94	15.4152	27.0058	30.8159	33.5718	33.967	34.9661	114.24	8.58789	15.8865	29.92	48.4718	46.5018	57.8025	62.3273	63.9164
117.04	15.4222	27.0058	30.8112	33.557	33.9623	34.9661	114.34	8.58008	15.8787	29.9122	48.4327	46.4628	57.7439	62.2413	63.8507
117.14	15.4144	26.998	30.7956	33.5445	33.9357	34.9583	114.44	8.57153	15.8701	29.8959	48.3969	46.4386	57.708	62.1937	63.7882
117.24	15.4144	26.998	30.7956	33.5445	33.9357	34.9465	114.54	8.57617	15.8748	29.8888	48.3702	46.4166	57.6541	62.1281	63.7367
117.34	15.4144	26.998	30.7909	33.5367	33.9326	34.9434	114.64	8.57617	15.8701	29.881	48.3312	46.4042	57.572	62.089	63.6906
117.44	15.4144	26.998	30.7722	33.532	33.9279	34.9387	114.74	8.56128	15.8435	29.8575	48.2999	46.3534	57.5134	62.007	63.6163
117.54	15.4128	27.0011	30.7753	33.5164	33.931	34.9293	114.84	8.55981	15.8435	29.8497	48.2687	46.3143	57.4595	61.9679	63.5656
117.64	15.4105	27.0058	30.7769	33.5211	33.931	34.927	114.94	8.56909	15.8481	29.8427	48.2343	46.2877	57.4087	61.9296	63.528
117.74	15.4105	27.0058	30.7643	33.5211	33.9162	34.927	115.04	8.573	15.8435	29.8419	48.2101	46.2635	57.3767	61.8781	63.4796
117.84	15.4027	26.9933	30.7643	33.5164	33.9162	34.9153	115.14	8.55664	15.8435	29.8302	48.171	46.2245	57.3259	61.7882	63.4406
117.94	15.4105	26.9863	30.7526	33.5015	33.8998	34.9153	115.24	8.55664	15.8403	29.8185	48.132	46.1932	57.2556	61.7147	63.3969
118.04	15.4027	26.9863	30.7526	33.5015	33.8928	34.9122	115.34	8.54492	15.824	29.7943	48.089	46.1425	57.1931	61.6281	63.3202
118.14	15.4027	26.9832	30.7526	33.4867	33.881	34.9028	115.44	8.54492	15.824	29.7677	48.0499	46.1034	57.1494	61.5773	63.2445
118.24	15.391	26.9667	30.7362	33.4703	33.8662	34.8958	115.54	8.54492	15.824	29.7723	48.0187	46.0558	57.0916	61.5187	63.1866
118.34	15.398	26.9785	30.7409	33.4703	33.8654	34.8958	115.64	8.53564	15.8154	29.7709	47.9828	46.0441	57.0557	61.4633	63.1312
118.44	15.384	26.9714	30.7261	33.4633	33.8584	34.884	115.74	8.53784	15.8201	29.7677	47.9562	46.0096	57.0181	61.4054	63.046
118.54	15.391	26.9785	30.7331	33.4625	33.8537	34.884	115.84	8.53711	15.8091	29.7528	47.9288	45.9635	56.9478	61.3436	62.9921
118.64	15.391	26.9785	30.7214	33.4625	33.8537	34.884	115.94	8.52539	15.8044	29.7404	47.8944	45.9198	56.9158	61.2765	62.9288
118.74	15.391	26.9785	30.7214	33.4507	33.8568	34.884	116.04	8.52539	15.8044	29.7286	47.8585	45.8807	56.8845	61.2179	62.8632
118.84	15.391	26.9738	30.7097	33.4507	33.8537	34.8809	116.14	8.52539	15.8044	29.7169	47.8195	45.8495	56.8455	61.1742	62.7999
118.94	15.4019	26.9698	30.705	33.446	33.8568	34.8793	116.24	8.52539	15.7927	29.7091	47.7999	45.8221	56.7979	61.1046	62.7413
119.04	15.3988	26.9745	30.7097	33.4507	33.8498	34.8762	116.34	8.52075	15.7927	29.6974	47.7562	45.7792	56.7634	61.0656	62.671
119.14	15.4066	26.9745	30.7097	33.4507	33.8498	34.8762	116.44	8.50195	15.7803	29.6849	47.7179	45.7401	56.7244	61.0265	62.6085
119.24	15.4035	26.9714	30.7097	33.439	33.8467	34.8715	116.54	8.50195	15.7732	29.6825	47.6866	45.7252	56.6931	60.9757	62.5695
119.34	15.4035	26.9745	30.7026	33.4437	33.8389	34.8692	116.64	8.50195	15.7732	29.6732	47.6561	45.6932	56.6541	60.9249	62.5187
119.44	15.4222	26.9745	30.7018	33.4507	33.849	34.8762	116.74	8.50195	15.7732	29.6583	47.6281	45.662	56.6228	60.8859	62.4601
119.54	15.4222	26.9745	30.7018	33.4429	33.842	34.8762	116.84	8.49878	15.7732	29.6466	47.6117	45.6307	56.5916	60.8397	62.421
119.64	15.4175	26.9745	30.7018	33.4382	33.842	34.8762	116.94	8.48633	15.7732	29.6271	47.589	45.6066	56.5408	60.8077	62.3702
119.74	15.4105	26.9745	30.7018	33.4195	33.8342	34.8762	117.04	8.48633	15.77	29.6271	47.5546	45.58	56.4971	60.757	62.2999
119.84	15.4105	26.9714	30.6901	33.4195	33.8224	34.8762	117.14	8.49414	15.7654	29.6075	47.5187	45.5409	56.4392	60.7101	62.2491
119.94	15.4105	26.9667	30.6901	33.4195	33.8224	34.8614	117.24	8.50122	15.7654	29.6193	47.5031	45.5409	56.4119	60.6593	62.2101
120.04	15.4222	26.9785	30.694	33.4312	33.8342	34.8684	117.34	8.49414	15.7654	29.6075	47.4796	45.5135	56.3806	60.6007	62.1515
120.14	15.4191	26.9738	30.694	33.4234	33.8146	34.8684	117.44	8.49097	15.7654	29.5997	47.4601	45.4901	56.3416	60.5616	62.1007
120.24	15.4144	26.9667	30.694	33.4086	33.8146	34.8637	117.54	8.47851	15.7654	29.588	47.4359	45.4628	56.2908	60.4991	62.0304
120.34	15.4144	26.9667	30.694	33.4039	33.8029	34.8567	117.64	8.47461	15.7568	29.5568	47.3976	45.4198	56.24	60.432	61.9601
120.44	15.4144	26.9667	30.6792	33.3922	33.8076	34.8536	117.74	8.46533	15.749	29.5521	47.3734	45.3956	56.1846	60.3695	61.8734
120.54	15.4144	26.9667	30.6745	33.3922	33.8146	34.8489	117.84	8.45581	15.7466	29.5348	47.3397	45.3588	56.1477	60.3085	61.8124
120.64	15.4144	26.9589	30.6745	33.3843	33.8068	34.8364	117.94	8.45972	15.7537	29.5294	47.3273	45.3339	56.1033	60.2452	61.7609
120.74	15.4222	26.9667	30.6745	33.3922	33.8146	34.8372	118.04	8.45508	15.7419	29.5131	47.3077	45.3026	56.0525	60.2062	61.7101
120.84	15.4175	26.9667	30.6581	33.3922	33.8146	34.8325	118.14	8.45508	15.7466	29.4982	47.2765	45.2714	56.0017	60.1476	61.6593
120.94	15.4105	26.9667	30.6558	33.3804	33.8029	34.8254	118.24	8.45508	15.7537	29.4865	47.257	45.2518	55.9431	60.0773	61.589
121.04	15.4074	26.9667	30.6511	33.3804	33.8029	34.8106	118.34	8.44726	15.7537	29.4786	47.2374	45.2323	55.8728	60.0265	61.5304
121.14	15.4144	26.9785	30.6628	33.3843	33.8146	34.8176	118.44	8.43482	15.7458	29.4591	47.2101	45.1932	55.8259	59.9679	61.4835
121.24	15.4144	26.9832	30.6503	33.3679	33.8146	34.8176	118.54	8.4231	15.7412	29.4545	47.1827	45.1691	55.7783	59.9047	61.4164
121.34	15.4144	26.9785	30.6432	33.3609	33.8068	34.8176	118.64	8.42847	15.7388	29.4403	47.1522	45.1471	55.7446	59.8397	61.3781
121.44	15.4144	26.9902	30.6315	33.3609	33.8068	34.8176	118.74	8.43555	15.7458	29.4442	47.1273	45.1261	55.7009	59.7928	61.3436
121.54	15.4144	26.9738	30.612	33.3492	33.7834	34.8012	118.84	8.43555	15.7458	29.4279	47.089	45.0917	55.6377	59.725	61.3031
121.64	15.4097	26.955	30.612	33.3414	33.7803	34.7825	118.94	8.43555	15.7373	29.4154	47.0695	45.0604	55.5845	59.6749	61.2296
121.74	15.4027	26.955	30.5972	33.3297	33.7826	34.7825	119.04	8.43555	15.7388	29.4083	47.0499	45.026	55.5525	59.6281	61.1788
121.84	15.4027	26.955	30.5925	33.3344	33.7639	34.7825	119.14	8.43555	15.7341	29.3966	47.0187	44.9972	55.5017	59.5726	61.1444
121.94	15.4027	26.955	30.5925	33.3414	33.7686	34.7747	119.24	8.42456	15.7146	29.381	46.9796	44.951	55.4431	59.507	61.0812
122.04	15.4027	26.9597	30.58	33.3297	33.7639	34.7747	119.34	8.4082	15.7146	29.3693	46.9491	44.9237	55.3962	59.4562	61.0421
122.14	15.391	26.9667	30.5729	33.3297	33.756	34.7715	119.44	8.41601	15.7224	29.3646	46.921	44.9003	55.3533	59.4249	61.0109
122.24	15.3894	26.9698	30.576	33.325	33.7592	34.77	119.54	8.41919	15.7256	29.349	46.9	44.869	55.3057	59.3663	60.9515
122.34	15.3871	26.9745	30.569	33.3297	33.7521	34.7629	119.64	8.41992	15.7146	29.3231	46.8553	44.819	55.2603	59.3046	60.8866
122.44	15.3871	26.9745	30.5737	33.3297	33.7443	34.7629	119.74	8.41602	15.7029	29.3231	46.8195	44.7902	55.2126	59.257	60.8507
122.54	15.3988	26.9745	30.5807	33.3179	33.7443	34.7551	119.84	8.41602	15.7029	29.3068	46.7882	44.7518	55.1736	59.1984	60.7804
122.64	15.3957	26.9628	30.5612	33.3179	33.7326	34.7504	119.94	8.41919	15.7061	29.3021	46.7594	44.7238	55.1306	59.1586	60.7328
122.74	15.391	26.9628	30.5612	33.3101	33.7326	34.7317	120.04	8.42383	15.6958	29.3068	46.7257	44.6971	55.0916	59.1163	60.682
122.84	15.391	26.9628	30.5612	33.2984	33.7248	34.7317	120.14	8.42383	15.6833	29.295	46.6945	44.6666	55.0283	59.0538	60.6241
122.94	15.391	26.9472	30.5417	33.2906	33.717	34.7239	120.24	8.41919	15.6833	29.2826	46.66	44.6307	54.9705	59.0148	60.5773
123.04	15.3988	26.955	30.5448	33.2984	33.7279	34.7239	120.34	8.41211	15.6833	29.2638	46.6281	44.6112	54.9314	58.964	60.4952
123.14	15.3988	26.955	30.53	33.2906	33.7209	34.7239	120.44	8.41211	15.6833	29.2606	46.5968	44.5675	54.8806	58.9132	60.4335
123.24	15.4035	26.9597	30.5347	33.2953	33.7256	34.7169	120.54	8.41357	15.6951	29.2645	46.5936	44.5573	54.8462	58.8827	60.3749
123.34	15.4105	26.962	30.5417	33.2906	33.7209	34.7239	120.64	8.41138	15.6904	29.2552	46.5648	44.5284	54.79	58.8226	60.3265
123.44	15.4027	26.9472	30.5292	33.2828	33.7131	34.7161	120.74	8.4043	15.6716	29.2365	46.5336	44.4869	54.7439	58.757	60.2609
123.54	15.3902	26.9472	30.5269	33.275	33.7053	34.7161	120.84	8.4043	15.6716	29.2169	46.507	44.4628	54.7009	58.7062	60.1906
123.64	15.3832	26.9355	30.5222	33.2664	33.7053	34.7083	120.94	8.4043	15.6685	29.2091	46.4757	44.4237	54.6665	58.6554	60.1398
123.74	15.3832	26.9355	30.5175	33.2711	33.6935	34.6965	121.04	8.4043	15.6638	29.1974	46.4562	44.3925	54.6345	58.5968	60.0648
123.84	15.3832	26.9355	30.5104	33.2562	33.6935	34.6965	121.14	8.4082	15.6631	29.2013	46.4452	44.3846	54.5955	58.5773	60.0187
123.94	15.3848	26.9371	30.5151	33.2679	33.6951	34.6895	121.24	8.41602	15.656	29.1896	46.421	44.3456	54.5564	58.5219	59.9601
124.04	15.3871	26.9394	30.5112	33.275	33.7092	34.6887	121.34	8.41284	15.6606	29.1747	46.3944	44.319	54.5298	58.4803	59.9061
124.14	15.3871	26.9394	30.5065	33.2632	33.6974	34.6887	121.44	8.41528	15.6482	29.1654	46.3649	44.2902	54.4814	58.4437	59.8656
124.24	15.3871	26.9347	30.4948	33.2632	33.6974	34.677	121.54	8.41602	15.6443	29.1537	46.3273	44.2667	54.4431	58.3866	59.7928
124.34	15.3902	26.9308	30.4979	33.2585	33.6927	34.6801	121.64	8.41602	15.6396	29.1466	46.3077	44.2323	54.4119	58.3663	59.7491
124.44	15.3949	26.9355	30.5026	33.2632	33.6974	34.677	121.74	8.41602	15.6326	29.1349	46.2733	44.201	54.3728	58.3156	59.6906
124.54	15.3949	26.9355	30.5026	33.2585	33.6857	34.6653	121.84	8.43237	15.6411	29.1434	46.2655	44.1862	54.3501	58.2733	59.6632
124.64	15.3832	26.9355	30.5026	33.2398	33.6857	34.6653	121.94	8.43945	15.6482	29.1388	46.2413	44.1659	54.3259	58.2374	59.632
124.74	15.3832	26.9355	30.4901	33.2398	33.6662	34.6653	122.04	8.41602	15.6248	29.1193	46.1976	44.1307	54.2588	58.1866	59.5695
124.84	15.3832	26.9277	30.4714	33.2398	33.6662	34.6575	122.14	8.42773	15.6365	29.1193	46.1827	44.1151	54.2244	58.1593	59.5304
124.94	15.3832	26.9277	30.4714	33.232	33.6615	34.6458	122.24	8.42773	15.6318	29.1115	46.1593	44.0956	54.1736	58.1202	59.4913
125.04	15.3832	26.9277	30.4714	33.232	33.6545	34.6458	122.34	8.43237	15.6294	29.1044	46.1366	44.0807	54.1509	58.0741	59.442
125.14	15.3863	26.9277	30.4597	33.232	33.6428	34.6309	122.44	8.44726	15.6443	29.1075	46.132	44.0643	54.1228	58.0382	59.4086
125.24	15.3879	26.9277	30.4565	33.2203	33.6349	34.6184	122.54	8.44727	15.6443	29.0966	46.1007	44.0331	54.0837	57.9874	59.3624
125.34	15.3863	26.9277	30.444	33.2172	33.6349	34.6215	122.64	8.44727	15.6326	29.0802	46.0812	43.9972	54.0447	57.9484	59.3195
125.44	15.3793	26.9277	30.444	33.2156	33.6232	34.6114	122.74	8.43945	15.6326	29.0724	46.0616	43.9674	53.9893	57.8976	59.2726
125.54	15.3793	26.9277	30.444	33.2125	33.6201	34.6067	122.84	8.44263	15.6279	29.0638	46.0336	43.9464	53.9463	57.85	59.2328
125.64	15.3723	26.916	30.4323	33.189	33.6037	34.5872	122.94	8.44727	15.6294	29.0607	46.0038	43.9315	53.9243	57.796	59.1859
125.74	15.3746	26.9042	30.4206	33.189	33.6037	34.5872	123.04	8.45508	15.6248	29.056	45.9828	43.9003	53.8877	57.7257	59.1359
125.84	15.3676	26.9042	30.4159	33.1742	33.6037	34.5872	123.14	8.43945	15.6169	29.0341	45.9406	43.8729	53.8337	57.6671	59.0858
125.94	15.3597	26.8964	30.3979	33.1648	33.5834	34.5676	123.24	8.43945	15.6052	29.0294	45.9093	43.8456	53.8025	57.6085	59.0421
126.04	15.3597	26.8964	30.405	33.1664	33.5764	34.5676	123.34	8.42774	15.5889	29.0099	45.8671	43.798	53.7446	57.546	58.9796
126.14	15.3597	26.8964	30.3932	33.157	33.5764	34.5629	123.44	8.44409	15.5981	29.0145	45.8475	43.7877	53.7173	57.528	58.9406
126.24	15.3566	26.8964	30.3932	33.1617	33.5764	34.5676	123.54	8.43482	15.5779	28.9928	45.807	43.7472	53.6689	57.4672	58.8773
126.34	15.3566	26.9011	30.3979	33.1664	33.5811	34.5606	123.64	8.44409	15.5825	28.9833	45.7968	43.7338	53.6345	57.4257	58.8553
126.44	15.3636	26.9034	30.3972	33.1586	33.5764	34.5676	123.74	8.44653	15.5896	28.9708	45.7765	43.7167	53.5955	57.3969	58.8085
126.54	15.355	26.8878	30.3768	33.1453	33.5677	34.5512	123.84	8.43945	15.5732	28.9708	45.7452	43.6854	53.5415	57.339	58.7531
126.64	15.3715	26.9042	30.3932	33.1617	33.5795	34.5606	123.94	8.43945	15.5662	28.963	45.7094	43.6573	53.4978	57.2804	58.714
126.74	15.3715	26.9011	30.3932	33.1617	33.5724	34.5676	124.04	8.43945	15.5693	28.9545	45.6742	43.6378	53.4697	57.2328	58.6735
126.84	15.3715	26.8964	30.3854	33.1492	33.5646	34.5559	124.14	8.43945	15.574	28.9474	45.6547	43.6276	53.4236	57.1984	58.6085
126.94	15.3715	26.8917	30.3854	33.1422	33.5646	34.5481	124.24	8.45508	15.5818	28.9474	45.6281	43.6034	53.3923	57.1671	58.589
127.04	15.3746	26.8847	30.3737	33.1422	33.5529	34.5481	124.34	8.44727	15.574	28.9474	45.5968	43.58	53.3533	57.1241	58.5382
127.14	15.3676	26.873	30.362	33.1187	33.5412	34.5247	124.44	8.45044	15.574	28.9279	45.5656	43.5526	53.3142	57.0897	58.4991
127.24	15.3676	26.8621	30.3503	33.1187	33.5412	34.5168	124.54	8.44336	15.5708	28.9161	45.546	43.5284	53.283	57.046	58.4484
127.34	15.3723	26.8621	30.355	33.1234	33.5459	34.5247	124.64	8.44336	15.5544	28.9083	45.5155	43.4901	53.2517	57.007	58.3976
127.44	15.3715	26.8722	30.362	33.1226	33.542	34.5247	124.74	8.43555	15.5498	28.8966	45.4796	43.4706	53.2126	56.9484	58.3436
127.54	15.3683	26.8738	30.3542	33.1226	33.5373	34.5247	124.84	8.43555	15.5427	28.8771	45.4484	43.4393	53.1619	56.9054	58.2882
127.64	15.3636	26.8691	30.3425	33.1226	33.5256	34.5168	124.94	8.42774	15.5349	28.8575	45.4015	43.3971	53.115	56.8507	58.2413
127.74	15.3636	26.8574	30.3347	33.1226	33.5256	34.5168	125.04	8.43555	15.5349	28.8497	45.382	43.3651	53.0759	56.8195	58.1827
127.84	15.3636	26.8605	30.3347	33.1109	33.5256	34.5051	125.14	8.43237	15.5349	28.8302	45.3507	43.3456	53.0251	56.7804	58.132
127.94	15.3636	26.8621	30.3229	33.1109	33.5256	34.5051	125.24	8.42773	15.5349	28.8185	45.307	43.3143	52.9939	56.7374	58.0929
128.04	15.3636	26.8574	30.3229	33.0992	33.5139	34.5051	125.34	8.43555	15.531	28.8185	45.2765	43.3026	52.958	56.7062	58.0499
128.14	15.3636	26.8574	30.3229	33.0992	33.506	34.5098	125.44	8.43091	15.5278	28.8068	45.2491	43.2831	52.9197	56.6671	58.0062
128.24	15.3636	26.8574	30.3182	33.0961	33.506	34.509	125.54	8.42383	15.5232	28.795	45.2179	43.2518	52.8689	56.6281	57.9366
128.34	15.3754	26.8691	30.3198	33.0953	33.506	34.5208	125.64	8.42383	15.5232	28.7919	45.2062	43.2323	52.8416	56.5773	57.9093
128.44	15.3754	26.8691	30.3073	33.0953	33.506	34.509	125.74	8.42383	15.5232	28.7794	45.1866	43.2128	52.8025	56.5414	57.8468
128.54	15.3707	26.8613	30.2956	33.0984	33.506	34.509	125.84	8.41602	15.52	28.7599	45.1522	43.1854	52.7681	56.4967	57.8046
128.64	15.3636	26.8495	30.2839	33.1031	33.506	34.509	125.94	8.4043	15.5154	28.7599	45.1202	43.1425	52.7212	56.4484	57.7413
128.74	15.3715	26.8574	30.2839	33.1109	33.506	34.5051	126.04	8.40112	15.5154	28.7482	45.0975	43.1229	52.6853	56.4093	57.6906
128.84	15.3715	26.8574	30.287	33.1078	33.4943	34.5051	126.14	8.39648	15.5154	28.7404	45.0499	43.0917	52.6345	56.3781	57.6515
128.94	15.3715	26.8574	30.28	33.1031	33.4943	34.4973	126.24	8.39648	15.5076	28.7255	45.0226	43.069	52.6033	56.339	57.6124
129.04	15.3715	26.8574	30.28	33.1031	33.4943	34.4973	126.34	8.39648	15.5076	28.713	44.9913	43.0448	52.5674	56.2882	57.5695
129.14	15.3715	26.8409	30.28	33.0867	33.4818	34.4973	126.44	8.39648	15.4958	28.7013	44.9601	43.0135	52.533	56.2491	57.5187
129.24	15.3597	26.8339	30.2651	33.0797	33.4748	34.4809	126.54	8.39648	15.499	28.6967	44.9406	42.994	52.4907	56.1906	57.4718
129.34	15.3832	26.8456	30.2839	33.0836	33.4748	34.4903	126.64	8.39966	15.5068	28.681	44.9164	42.9659	52.4385	56.1508	57.432
129.44	15.3715	26.8378	30.2761	33.0836	33.4748	34.4973	126.74	8.40112	15.5083	28.6747	44.8944	42.9432	52.4087	56.1132	57.3944
129.54	15.3762	26.8378	30.2643	33.0914	33.4748	34.4895	126.84	8.39966	15.499	28.6732	44.8656	42.9073	52.3682	56.0531	57.3422
129.64	15.3949	26.8378	30.2675	33.0914	33.4717	34.4895	126.94	8.39966	15.5037	28.6661	44.8507	42.8925	52.3337	56.0265	57.3077
129.74	15.3949	26.8378	30.2604	33.0867	33.4584	34.4778	127.04	8.39258	15.5037	28.6537	44.8195	42.8761	52.2979	55.9874	57.257
129.84	15.3949	26.8378	30.2526	33.0718	33.46	34.4778	127.14	8.38477	15.4958	28.6271	44.7921	42.8221	52.2439	55.9288	57.2023
129.94	15.3949	26.8378	30.2573	33.0718	33.4584	34.4778	127.24	8.38159	15.4958	28.6193	44.764	42.8026	52.2048	55.8781	57.1398
130.04	15.3949	26.8261	30.2526	33.0718	33.4521	34.47	127.34	8.36914	15.4841	28.6044	44.7413	42.7682	52.1541	55.8312	57.1124
130.14	15.3902	26.8214	30.2479	33.0671	33.4427	34.4536	127.44	8.36914	15.4841	28.5951	44.7101	42.7355	52.1228	55.7804	57.0616
130.24	15.3715	26.8191	30.2331	33.0484	33.4357	34.4465	127.54	8.36206	15.4888	28.5895	44.6952	42.7174	52.0852	55.7421	57.0233
130.34	15.3793	26.8339	30.2362	33.0531	33.4349	34.4575	127.64	8.35742	15.4731	28.5685	44.671	42.6893	52.0447	55.6906	56.9843
130.44	15.3715	26.8261	30.2261	33.0406	33.4287	34.4395	127.74	8.35742	15.4685	28.5607	44.6444	42.6666	52.001	55.6476	56.9523
130.54	15.3793	26.8261	30.2292	33.0406	33.424	34.4426	127.84	8.35742	15.4568	28.549	44.6124	42.6346	51.9626	55.6085	56.9132
130.64	15.3793	26.8261	30.2292	33.0406	33.424	34.4426	127.94	8.35278	15.4568	28.5411	44.5929	42.6229	51.9119	55.5695	56.8741
130.74	15.3793	26.8261	30.2214	33.032	33.4271	34.4379	128.04	8.3457	15.4568	28.5294	44.5616	42.5917	51.8728	55.5304	56.8429
130.84	15.3793	26.8261	30.2214	33.0336	33.4201	34.4426	128.14	8.3457	15.4568	28.5216	44.5421	42.5643	51.8455	55.4796	56.7953
130.94	15.3746	26.8261	30.2097	33.0289	33.4201	34.4309	128.24	8.33472	15.4412	28.4974	44.5148	42.5253	51.7869	55.4327	56.7413
131.04	15.3676	26.8261	30.2097	33.0289	33.4201	34.4309	128.34	8.33008	15.4412	28.4904	44.4835	42.494	51.7556	55.382	56.6906
131.14	15.3793	26.8378	30.2136	33.0328	33.424	34.4348	128.44	8.31836	15.4294	28.4786	44.4398	42.4667	51.7212	55.3624	56.6632
131.24	15.3793	26.8261	30.2136	33.0328	33.4092	34.4348	128.54	8.31836	15.4326	28.4708	44.4015	42.4354	51.6775	55.2999	56.6124
131.34	15.3793	26.8261	30.2136	33.0328	33.4076	34.4395	128.64	8.31836	15.4373	28.4591	44.3702	42.3964	51.6462	55.2726	56.5616
131.44	15.391	26.8261	30.2136	33.0328	33.4045	34.4301	128.74	8.31372	15.4373	28.4513	44.3507	42.3768	51.6072	55.2218	56.5109
131.54	15.391	26.8261	30.2018	33.0211	33.3928	34.4278	128.84	8.30664	15.4341	28.4513	44.3202	42.3456	51.5798	55.1781	56.4718
131.64	15.4027	26.8378	30.2253	33.0328	33.4045	34.4387	128.94	8.30664	15.4177	28.4364	44.296	42.3175	51.5369	55.1281	56.421
131.74	15.4027	26.8378	30.2253	33.0328	33.4092	34.4387	129.04	8.30664	15.4255	28.4349	44.2726	42.2994	51.5127	55.0968	56.3898
131.84	15.4027	26.83	30.2253	33.0281	33.4162	34.427	129.14	8.30664	15.4255	28.4279	44.2413	42.2667	51.4744	55.046	56.3312
131.94	15.4027	26.83	30.2089	33.0093	33.4045	34.427	129.24	8.30664	15.4209	28.4279	44.2218	42.2291	51.4431	55.007	56.2882
132.04	15.4027	26.83	30.2018	33.0093	33.3967	34.4192	129.34	8.30347	15.406	28.42	44.1859	42.1932	51.4236	54.9679	56.2296
132.14	15.4027	26.8183	30.1901	33.0015	33.3967	34.4192	129.44	8.302	15.4092	28.4115	44.1625	42.1652	51.3831	54.9008	56.182
132.24	15.4105	26.8261	30.2026	33.0093	33.4045	34.4153	129.54	8.29492	15.4138	28.4044	44.1398	42.1503	51.3494	54.8663	56.1281
132.34	15.4105	26.8261	30.205	33.0062	33.3928	34.4153	129.64	8.29175	15.4106	28.3934	44.1053	42.108	51.304	54.8209	56.0741
132.44	15.4105	26.8261	30.1901	32.9929	33.3802	34.42	129.74	8.2793	15.3982	28.3778	44.0734	42.076	51.2478	54.7531	56.0109
132.54	15.4027	26.8183	30.1823	32.982	33.3654	34.4145	129.84	8.28247	15.3896	28.3763	44.0453	42.048	51.2197	54.7054	55.9945
132.64	15.4027	26.8183	30.1823	32.982	33.3537	34.4075	129.94	8.28247	15.3943	28.3693	44.0187	42.0253	51.1931	54.6593	55.9406
132.74	15.4027	26.8183	30.1706	32.982	33.3537	34.3958	130.04	8.27539	15.3896	28.3615	43.9945	42.0018	51.1658	54.6202	55.8944
132.84	15.4027	26.8183	30.1706	32.9703	33.3506	34.3958	130.14	8.26758	15.3748	28.3497	43.9679	41.9823	51.1345	54.5695	55.8702
132.94	15.4027	26.8066	30.1628	32.9703	33.3459	34.3879	130.24	8.26758	15.3748	28.3497	43.9601	41.955	51.0986	54.5304	55.8265
133.04	15.4027	26.8097	30.1628	32.9703	33.3459	34.3879	130.34	8.27222	15.3762	28.3466	43.9303	41.9283	51.0571	54.496	55.778
133.14	15.4027	26.8144	30.1628	32.9625	33.3381	34.3879	130.44	8.27466	15.3818	28.3419	43.9132	41.9042	51.0415	54.4718	55.7452
133.24	15.3996	26.8144	30.1628	32.9594	33.3381	34.3879	130.54	8.25586	15.3865	28.3373	43.882	41.8768	50.9978	54.4327	55.7023
133.34	15.398	26.8066	30.1511	32.9547	33.3264	34.3879	130.64	8.25586	15.3865	28.327	43.8624	41.8456	50.9619	54.3898	55.6749
133.44	15.4105	26.8144	30.1589	32.9625	33.3342	34.384	130.74	8.25269	15.3748	28.3224	43.8383	41.8175	50.9236	54.3507	55.6241
133.54	15.4105	26.8113	30.1589	32.9507	33.3295	34.3762	130.84	8.25269	15.3794	28.3075	43.8209	41.8041	50.9009	54.3163	55.5929
133.64	15.4105	26.8066	30.1589	32.9507	33.3146	34.3762	130.94	8.26294	15.3896	28.3177	43.807	41.7784	50.8916	54.2758	55.5453
133.74	15.4105	26.7988	30.1479	32.9351	33.3068	34.3684	131.04	8.26758	15.3943	28.3029	43.7875	41.7635	50.865	54.2413	55.5109
133.84	15.4105	26.8066	30.1511	32.9429	33.3029	34.3645	131.14	8.25977	15.3943	28.2911	43.7491	41.7362	50.8337	54.2101	55.4718
133.94	15.4105	26.8019	30.1511	32.9429	33.3029	34.3645	131.24	8.26758	15.4021	28.2911	43.7374	41.7206	50.7993	54.1742	55.4374
134.04	15.4105	26.7949	30.1511	32.9382	33.2912	34.3645	131.34	8.27222	15.3989	28.2841	43.7194	41.6979	50.7681	54.1405	55.3976
134.14	15.4105	26.7949	30.1432	32.9195	33.2881	34.352	131.44	8.26758	15.3943	28.2911	43.6906	41.6854	50.7361	54.1085	55.3702
134.24	15.4105	26.7949	30.1432	32.9195	33.2834	34.345	131.54	8.26758	15.3911	28.2716	43.6827	41.6659	50.7048	54.0773	55.3312
134.34	15.4183	26.7949	30.1315	32.9125	33.2756	34.3333	131.64	8.26294	15.3818	28.2552	43.6586	41.63	50.6729	54.0336	55.2953
134.44	15.4183	26.7831	30.1315	32.9195	33.2709	34.338	131.74	8.25122	15.3669	28.2357	43.6202	41.6034	50.6345	53.9952	55.2374
134.54	15.4183	26.7831	30.1315	32.9117	33.2521	34.3372	131.84	8.24414	15.3669	28.2169	43.6007	41.5721	50.5955	53.9562	55.1952
134.64	15.4152	26.78	30.1315	32.907	33.2521	34.3254	131.94	8.24414	15.3552	28.2091	43.5812	41.5526	50.5518	53.9171	55.132
134.74	15.4105	26.7675	30.1315	32.9	33.2521	34.3254	132.04	8.25342	15.3599	28.202	43.5546	41.5377	50.5063	53.871	55.1053
134.84	15.4027	26.7597	30.1237	32.8804	33.249	34.3176	132.14	8.25586	15.3669	28.2013	43.5375	41.5253	50.4744	53.839	55.0687
134.94	15.4027	26.7597	30.119	32.8804	33.2482	34.3223	132.24	8.25586	15.3669	28.1942	43.4991	41.494	50.4548	53.7999	55.0304
135.04	15.4027	26.7597	30.1042	32.8804	33.2365	34.3176	132.34	8.25586	15.3623	28.1818	43.4718	41.4745	50.4158	53.757	54.9913
135.14	15.4027	26.755	30.1042	32.8804	33.2396	34.3176	132.44	8.25586	15.3552	28.17	43.4523	41.4432	50.3728	53.7179	54.9523
135.24	15.391	26.7441	30.0894	32.8609	33.2295	34.2934	132.54	8.24341	15.3552	28.1576	43.4288	41.4237	50.3337	53.6788	54.9132
135.34	15.4027	26.748	30.0964	32.8726	33.2287	34.3028	132.64	8.24414	15.3467	28.1537	43.4125	41.391	50.2979	53.6383	54.8734
135.44	15.391	26.7363	30.0729	32.8609	33.2201	34.2934	132.74	8.25122	15.3435	28.1466	43.3898	41.3658	50.2634	53.6163	54.839
135.54	15.4027	26.7558	30.0847	32.8578	33.2248	34.2981	132.84	8.24414	15.3435	28.1434	43.3663	41.3534	50.2322	53.5734	54.8031
135.64	15.391	26.7332	30.0612	32.8414	33.2131	34.2794	132.94	8.24414	15.3435	28.1342	43.3358	41.3339	50.1931	53.5311	54.7687
135.74	15.391	26.7285	30.0612	32.8414	33.2131	34.2864	133.04	8.25586	15.3435	28.131	43.3116	41.3143	50.1658	53.4874	54.7491
135.84	15.391	26.7363	30.0534	32.8336	33.2131	34.2864	133.14	8.24414	15.3435	28.1239	43.2875	41.2948	50.1228	53.4484	54.6984
135.94	15.391	26.7285	30.0534	32.8336	33.2131	34.2739	133.24	8.24414	15.3481	28.1193	43.2491	41.2753	50.0837	53.4171	54.6593
136.04	15.3863	26.7238	30.0534	32.8336	33.1982	34.2668	133.34	8.24878	15.3599	28.1161	43.2343	41.2487	50.0493	53.3944	54.61
136.14	15.384	26.7167	30.0417	32.8218	33.1935	34.2668	133.44	8.26294	15.3623	28.1185	43.2062	41.2269	50.0127	53.3461	54.5765
136.24	15.398	26.7167	30.0417	32.8218	33.1888	34.2551	133.54	8.24561	15.3599	28.1044	43.1678	41.2103	49.9673	53.3077	54.535
136.34	15.391	26.7167	30.0417	32.8218	33.174	34.2551	133.64	8.25976	15.3669	28.0919	43.1437	41.1925	49.947	53.2655	54.4984
136.44	15.391	26.7167	30.0339	32.8218	33.174	34.2551	133.74	8.25513	15.3623	28.0748	43.1078	41.1573	49.9111	53.2172	54.4672
136.54	15.4027	26.7238	30.0456	32.8289	33.1857	34.2668	133.84	8.25586	15.3552	28.0568	43.0765	41.1307	49.8728	53.1788	54.4288
136.64	15.4027	26.7167	30.0339	32.8101	33.174	34.2621	133.94	8.25586	15.3552	28.045	43.0382	41.0995	49.8337	53.1281	54.3749
136.74	15.4027	26.7167	30.0339	32.8101	33.174	34.252	134.04	8.2605	15.3481	28.0419	43.0233	41.0846	49.8071	53.1014	54.3358
136.84	15.4027	26.705	30.0339	32.8023	33.174	34.259	134.14	8.25586	15.3552	28.0372	42.9991	41.0604	49.783	53.0773	54.2999
136.94	15.391	26.6933	30.0143	32.7906	33.1545	34.2309	134.24	8.25122	15.3552	28.0294	42.9796	41.0409	49.7556	53.0382	54.2531
137.04	15.391	26.6933	30.0143	32.7906	33.1623	34.2239	134.34	8.24414	15.3552	28.0145	42.9523	41.0214	49.708	52.9991	54.2023
137.14	15.4027	26.7019	30.0261	32.8023	33.174	34.2208	134.44	8.24414	15.3552	28.0021	42.921	41.0096	49.6736	52.9679	54.1632
137.24	15.391	26.6855	30.0026	32.7789	33.1514	34.2043	134.54	8.24414	15.3474	27.9904	42.8898	40.9823	49.6423	52.9288	54.1202
137.34	15.391	26.6855	30.0026	32.7758	33.1467	34.1996	134.64	8.24414	15.3474	27.9779	42.8656	40.9596	49.6001	52.8898	54.0695
137.44	15.3996	26.6855	29.9909	32.7632	33.1467	34.2012	134.74	8.23633	15.3311	27.9591	42.8273	40.9354	49.5642	52.839	54.0226
137.54	15.3879	26.6902	29.9878	32.7679	33.1514	34.2012	134.84	8.24414	15.324	27.9591	42.8077	40.912	49.5251	52.8031	53.9718
137.64	15.3949	26.6972	29.9831	32.7632	33.1584	34.2036	134.94	8.23633	15.324	27.9427	42.785	40.8925	49.4939	52.757	53.921
137.74	15.3949	26.6925	29.9831	32.7632	33.1584	34.1965	135.04	8.2395	15.3154	27.9388	42.764	40.8878	49.4775	52.7211	53.8851
137.84	15.3949	26.6855	29.9831	32.7632	33.1584	34.1965	135.14	8.24414	15.3201	27.9357	42.7491	40.8612	49.4431	52.6866	53.839
137.94	15.398	26.6972	29.9784	32.7617	33.1615	34.1996	135.24	8.24414	15.3123	27.9208	42.7296	40.8534	49.4119	52.6437	53.7953
138.04	15.3996	26.6941	29.98	32.7679	33.1514	34.1895	135.34	8.24414	15.3123	27.9083	42.7101	40.8221	49.3728	52.6046	53.7491
138.14	15.4066	26.6894	29.9636	32.7484	33.1467	34.1817	135.44	8.24878	15.3052	27.9012	42.6788	40.8151	49.3579	52.5585	53.703
138.24	15.4066	26.6894	29.9636	32.7437	33.142	34.1692	135.54	8.25586	15.3123	27.9083	42.6476	40.8026	49.3291	52.5265	53.6788
138.34	15.4066	26.6847	29.9636	32.7468	33.1349	34.1692	135.64	8.25269	15.3013	27.8973	42.6249	40.7799	49.2798	52.4843	53.6366
138.44	15.3902	26.6777	29.9636	32.7437	33.1271	34.1692	135.74	8.25976	15.2966	27.8927	42.6124	40.7675	49.2556	52.4601	53.6046
138.54	15.391	26.6808	29.9542	32.7468	33.1302	34.1559	135.84	8.25977	15.2966	27.8881	42.5812	40.7362	49.2244	52.4288	53.5585
138.64	15.4027	26.6855	29.9518	32.7515	33.1232	34.1536	135.94	8.25977	15.2966	27.8732	42.5616	40.7167	49.1853	52.3898	53.5148
138.74	15.4144	26.6824	29.9401	32.7398	33.1232	34.1536	136.04	8.2644	15.2966	27.87	42.5311	40.6854	49.1587	52.3624	53.4757
138.84	15.4144	26.6777	29.9401	32.7367	33.1232	34.1505	136.14	8.27002	15.2998	27.8568	42.5094	40.6691	49.1416	52.3226	53.4476
138.94	15.4144	26.666	29.9401	32.7203	33.1154	34.1379	136.24	8.26758	15.2966	27.8497	42.4991	40.6659	49.115	52.2999	53.3969
139.04	15.4097	26.6777	29.9323	32.7203	33.1154	34.1379	136.34	8.26758	15.2849	27.8419	42.4764	40.6346	49.0837	52.2491	53.3507
139.14	15.4074	26.666	29.9292	32.7156	33.1154	34.1379	136.44	8.27222	15.2896	27.8466	42.4491	40.6198	49.0493	52.2147	53.3163
139.24	15.4144	26.6613	29.9245	32.7203	33.1037	34.1379	136.54	8.26294	15.2803	27.8326	42.4164	40.5909	49.0127	52.1547	53.2758
139.34	15.4222	26.6542	29.9128	32.7086	33.1037	34.1379	136.64	8.25586	15.2654	27.8068	42.3898	40.5721	48.9744	52.1085	53.2296
139.44	15.4144	26.6542	29.9128	32.7007	33.1084	34.1215	136.74	8.25586	15.27	27.8068	42.3702	40.5448	48.9385	52.0656	53.1874
139.54	15.4222	26.6589	29.9175	32.7054	33.1154	34.1192	136.84	8.25586	15.2607	27.8068	42.3507	40.5214	48.9001	52.0194	53.1547
139.64	15.4308	26.6824	29.9128	32.7007	33.1154	34.1262	136.94	8.2605	15.2537	27.799	42.3312	40.5018	48.8728	51.9945	53.1171
139.74	15.4261	26.6847	29.9128	32.6929	33.1037	34.1184	137.04	8.26758	15.2537	27.7872	42.3116	40.494	48.8384	51.9562	53.0734
139.84	15.4261	26.6824	29.905	32.6812	33.1084	34.1184	137.14	8.25122	15.2419	27.7755	42.2804	40.451	48.7908	51.9054	53.0109
139.94	15.434	26.6894	29.905	32.6812	33.1076	34.1114	137.24	8.23633	15.2271	27.7645	42.2413	40.4354	48.7556	51.871	52.9718
140.04	15.434	26.6847	29.9003	32.6734	33.1154	34.1184	137.34	8.23633	15.2263	27.7552	42.2218	40.3925	48.7048	51.839	52.9164
140.14	15.434	26.666	29.8932	32.6617	33.1076	34.1137	137.44	8.23633	15.2263	27.7482	42.1976	40.3729	48.6736	51.8077	52.882
140.24	15.434	26.666	29.8932	32.6617	33.1107	34.095	137.54	8.24097	15.231	27.7411	42.1835	40.3698	48.6509	51.7765	52.8358
140.34	15.4371	26.6738	29.8846	32.6453	33.1068	34.0981	137.64	8.24805	15.238	27.7404	42.1757	40.3456	48.6267	51.7491	52.8116
140.44	15.4449	26.6855	29.8893	32.65	33.1084	34.1028	137.74	8.25122	15.2295	27.7435	42.1664	40.3175	48.5908	51.7101	52.7758
140.54	15.4496	26.6855	29.8815	32.6382	33.0959	34.1028	137.84	8.25586	15.2341	27.7365	42.1515	40.3026	48.5479	51.682	52.7491
140.64	15.4387	26.6855	29.8815	32.6382	33.0959	34.0919	137.94	8.24414	15.2146	27.7169	42.0961	40.2714	48.5017	51.6327	52.6788
140.74	15.434	26.6808	29.8815	32.6304	33.0959	34.0872	138.04	8.25586	15.2263	27.7169	42.0695	40.2518	48.4744	51.589	52.6515
140.84	15.434	26.6738	29.8698	32.6187	33.0842	34.0754	138.14	8.24097	15.2146	27.7052	42.0382	40.201	48.4282	51.546	52.5968
140.94	15.4293	26.6738	29.8698	32.6156	33.0842	34.0786	138.24	8.24341	15.2263	27.7091	42.0187	40.1815	48.4041	51.5265	52.5695
141.04	15.4301	26.6738	29.862	32.6109	33.0717	34.0723	138.34	8.23633	15.2263	27.6974	41.9991	40.1573	48.3728	51.4991	52.5304
141.14	15.4222	26.6738	29.8573	32.5992	33.0529	34.0676	138.44	8.23633	15.2146	27.6942	41.9796	40.1425	48.3291	51.4601	52.4991
141.24	15.4348	26.6738	29.8503	32.6023	33.0529	34.0676	138.54	8.22925	15.2075	27.6825	41.9498	40.1041	48.2876	51.4218	52.453
141.34	15.4371	26.6738	29.8386	32.5992	33.0451	34.0676	138.64	8.23633	15.2146	27.6818	41.921	40.0721	48.2634	51.3976	52.4093
141.44	15.4222	26.6738	29.8386	32.5992	33.0451	34.0559	138.74	8.23316	15.2068	27.674	41.8937	40.0448	48.2212	51.3624	52.3624
141.54	15.4301	26.6785	29.8386	32.5875	33.0334	34.0512	138.84	8.2207	15.2068	27.6576	41.8624	40.0214	48.1775	51.3312	52.3312
141.64	15.4301	26.6777	29.8354	32.5844	33.0334	34.0364	138.94	8.2168	15.1873	27.6388	41.8187	39.9823	48.1345	51.2687	52.2804
141.74	15.4301	26.6777	29.8307	32.5797	33.0217	34.0247	139.04	8.21216	15.1709	27.6271	41.7804	39.9596	48.1072	51.2374	52.2609
141.84	15.4301	26.6777	29.8307	32.5718	33.0139	34.0247	139.14	8.20044	15.1592	27.6146	41.7562	39.9191	48.0549	51.1937	52.2054
141.94	15.4301	26.6777	29.8229	32.5601	33.0139	34.0215	139.24	8.20508	15.1606	27.6193	41.7296	39.9073	48.0251	51.1788	52.171
142.04	15.4301	26.6777	29.8229	32.5601	33.0139	34.0168	139.34	8.20508	15.156	27.6075	41.6984	39.8807	47.9939	51.1429	52.132
142.14	15.4301	26.6691	29.8112	32.5523	33.0068	34.0051	139.44	8.198	15.1411	27.6005	41.6639	39.8541	47.9556	51.0983	52.0936
142.24	15.4301	26.6738	29.8112	32.5406	33.0139	33.9973	139.54	8.20508	15.1482	27.5997	41.6515	39.8221	47.9353	51.0609	52.0695
142.34	15.4301	26.6738	29.8112	32.5359	33.006	33.9973	139.64	8.20972	15.1365	27.588	41.632	39.7994	47.8923	51.035	52.0304
[truncated: 1,706 more rows]
