# Supplementary material for: Structural insights into the activation of human calcium-sensing receptor
Source: eLife. 2021 Sep 1;10:e68578. doi: 10.7554/eLife.68578 (PMC8476121; doi:10.7554/eLife.68578)
Supplement: Figure 3—source data 1. [file elife-68578-fig3-data1.xlsx]

## Sheet: Sheet1
Figure 3-Source Data 1 Intracellular Ca2+ flux assay on CaSR mutations
logCa2+mM	WT				Y489F				D190K				S170K				E297K
-0.3	0.42	0	0	0.42	2.93	3.77	3.77	2.93	2.09	3.35	2.51	2.51	3.35	3.77	2.93	3.35	3.77	1.67	2.51	1.67
-0.18	2.51	5.86	2.93	1.67	0	4.18	7.95	0.84	1.67	0.84	4.18	0.84	1.26	0	0.42	2.09	0.84	1.67	0.84	0
-0.08	21.76	18.83	13.81	10.46	2.09	2.09	1.67	0	3.35	2.93	0.84	2.51	2.93	0.42	2.51	0.42	1.26	1.67	0.42	1.26
0	30.96	30.13	28.87	23.43	4.18	3.77	3.77	3.35	4.6	3.35	2.93	3.35	7.11	4.6	7.11	4.6	4.6	3.35	3.35	3.35
0.1	36.4	29.71	28.87	29.71	3.77	3.77	2.51	2.93	2.51	0	1.67	1.26	3.35	2.93	2.93	6.28	2.51	4.18	2.09	2.51
0.18	52.3	39.33	59.83	35.56	18.41	16.74	5.44	6.28	3.35	3.77	4.18	2.93	7.11	8.79	11.3	11.3	3.35	2.51	3.35	2.09
0.3	65.69	67.78	56.49	61.92	24.69	26.78	17.57	16.74	7.53	8.37	9.62	2.93	12.55	13.39	21.34	12.97	2.51	3.77	3.35	2.93
0.4	65.27	71.97	82.43	71.13	44.35	44.35	43.93	28.87	6.28	3.35	4.18	3.35	10.04	10.88	14.23	13.39	2.93	2.93	2.51	3.35
0.48	72.8	74.06	71.13	71.55	36.82	47.7	45.61	41	5.86	6.69	3.35	3.77	11.72	13.39	13.39	12.13	2.09	2.93	2.93	4.18
0.6	69.04	89.54	84.1	79.5	51.88	53.14	65.69	51.05	4.6	6.69	3.77	4.18	10.88	16.74	15.9	16.74	2.51	3.77	3.77	1.26
0.7	90.38	94.98	96.65	90.38	70.29	76.57	76.15	56.49	8.79	5.86	8.37	5.44	17.99	15.06	22.59	22.59	2.51	2.93	2.51	4.18
0.85	89.54	95.82	98.33	97.07	82.01	89.96	85.36	68.62	10.46	10.88	6.69	7.53	16.74	24.27	21.34	27.2	1.26	2.93	2.93	2.93
1	83.68	94.14	94.14	100	70.29	75.31	73.22	70.29	10.46	9.21	3.35	2.93	19.67	27.62	24.27	21.34	2.51	3.77	4.6	3.35
