# Supplementary material for: Structural insights into the activation of human calcium-sensing receptor
Source: eLife. 2021 Sep 1;10:e68578. doi: 10.7554/eLife.68578 (PMC8476121; doi:10.7554/eLife.68578)
Supplement: Figure 3—source data 2. [file elife-68578-fig3-data2.xlsx]

## Sheet: Sheet1
Figure 3-Source Data 2 Intracellular Ca2+ flux assay on CaSR-TNCA complex
Concentration of TNCA (mM)	Intracellular calcium response % maximum (0.5 mM CaCl2)
-5	22.0962	21.0975	21.5969
-5.52288	14.1066	12.9831	12.8582
-6	13.3576	12.6086	12.4837
-6.52288	13.2328	12.6086	12.6086
-7	32.7074	26.2158	19.4746
-7.52288	55.1781	69.2848	64.9155
-8	81.1443	76.8998	70.658
-8.52288	90.1326	89.1339	90
