# Supplementary material for: Structural insights into the activation of human calcium-sensing receptor
Source: eLife. 2021 Sep 1;10:e68578. doi: 10.7554/eLife.68578 (PMC8476121; doi:10.7554/eLife.68578)
Supplement: Figure 7—source data 1. [file elife-68578-fig7-data1.xlsx]

## Sheet: Sheet1
Figure 7-Source Data 1 Intracellular Ca2+ flux assay on various CaSR mutations
logCa2+mM	WT				F789A				F792A				P823R
-0.3	0.42	0	0	0.42	2.93	4.6	3.77	3.77	1.67	0	1.67	1.26	1.26	2.51	2.93	0
-0.18	2.51	5.86	2.93	1.67	2.09	0.42	0.84	0.84	2.09	1.26	6.69	1.26	5.44	2.93	4.18	2.93
-0.08	21.76	18.83	13.81	10.46	2.51	2.09	0	0.42	1.26	0.42	4.18	1.67	6.69	5.02	3.35	2.51
0	30.96	30.13	28.87	23.43	6.69	4.18	3.77	6.69	5.02	3.77	4.18	3.35	7.53	6.28	6.28	4.6
0.1	36.4	29.71	28.87	29.71	7.53	8.79	5.02	6.28	6.69	6.69	6.69	5.44	9.21	7.53	8.79	7.95
0.18	52.3	39.33	59.83	35.56	9.62	8.79	9.21	7.95	12.97	17.99	11.3	13.39	12.13	12.97	16.74	14.64
0.3	65.69	67.78	56.49	61.92	13.81	14.64	13.81	11.3	19.67	20.5	21.34	17.57	19.67	17.99	18.83	17.99
0.4	65.27	71.97	82.43	71.13	12.97	13.39	12.55	16.74	24.27	27.2	24.69	22.18	24.69	35.56	28.03	24.69
0.48	72.8	74.06	71.13	71.55	12.55	14.64	15.48	17.15	24.69	28.45	24.27	25.1	20.92	28.87	20.92	20.92
0.6	69.04	89.54	84.1	79.5	19.67	17.99	20.5	18.83	25.94	33.05	32.64	27.62	15.06	22.18	28.45	23.43
0.7	90.38	94.98	96.65	90.38	20.92	23.01	23.43	22.59	32.22	38.49	37.66	32.22	29.71	34.31	34.31	28.87
0.85	89.54	95.82	98.33	97.07	20.92	21.34	22.18	23.43	35.15	36.4	35.98	39.33	32.22	38.08	37.24	33.89
1	83.68	94.14	94.14	100	38.08	40.17	41	31.8	28.03	31.38	33.89	35.98	30.96	46.44	51.05	44.35
