# Supplementary material for: Structural insights into the activation of human calcium-sensing receptor
Source: eLife. 2021 Sep 1;10:e68578. doi: 10.7554/eLife.68578 (PMC8476121; doi:10.7554/eLife.68578)
Supplement: Figure 8—source data 1. [file elife-68578-fig8-data1.xlsx]

## Sheet: Sheet1
Figure 8-Source Data 1 Intracellular Ca2+ flux assay on various CaSR mutations
logCa2+mM	WT				ΔD758-E759				K601E				W590E
-0.3	0.42	0	0	0.42	3.35	5.44	4.6	3.77	0.42	0.42	0.84	0.84	1.67	2.09	2.93	4.18
-0.18	2.51	5.86	2.93	1.67	0	1.67	2.93	0.84	1.26	0	0.84	2.51	2.09	1.67	1.67	2.09
-0.08	21.76	18.83	13.81	10.46	2.51	2.93	2.09	0.84	0.84	1.26	2.09	1.67	0.42	1.67	1.67	1.67
0	30.96	30.13	28.87	23.43	5.02	4.6	2.93	3.35	1.67	2.93	3.35	3.35	0.42	0.84	0.42	0
0.1	36.4	29.71	28.87	29.71	6.28	5.86	7.11	7.11	3.35	3.35	5.02	0.42	1.67	2.09	2.93	2.51
0.18	52.3	39.33	59.83	35.56	12.55	16.74	13.39	15.9	1.26	2.93	3.77	3.77	2.51	5.02	3.77	2.93
0.3	65.69	67.78	56.49	61.92	18.41	20.5	20.5	21.34	4.6	4.6	5.86	5.02	6.69	10.88	7.53	7.11
0.4	65.27	71.97	82.43	71.13	21.76	20.92	24.27	26.36	7.11	7.11	11.72	10.46	10.46	10.88	12.97	14.23
0.48	72.8	74.06	71.13	71.55	22.18	25.52	20.92	23.43	15.48	10.88	18.41	15.9	12.13	10.46	12.97	11.3
0.6	69.04	89.54	84.1	79.5	23.43	30.54	30.54	28.87	27.62	18.83	27.2	25.52	13.81	17.15	18.41	20.5
0.7	90.38	94.98	96.65	90.38	33.89	39.33	39.33	35.56	16.32	30.96	34.73	30.96	28.87	15.9	28.03	25.1
0.85	89.54	95.82	98.33	97.07	35.56	40.17	37.66	34.73	24.27	30.54	33.47	28.45	27.2	30.96	26.36	27.62
1	83.68	94.14	94.14	100	36.82	42.26	42.26	36.82	27.62	32.64	31.38	31.8	30.13	33.05	32.22	30.96
